# Supplementary material
Source: PubMed Central journal article supplement (PMC9359894)

# THE LANCET

## Global Health

### Supplementary appendix 2

This translation in French was submitted by the authors and we reproduce it as supplied. It has not been peer reviewed. *The Lancet's* editorial processes have only been applied to the original in English, which should serve as reference for this manuscript.

Cette traduction en français a été proposée par les auteurs et nous l'avons reproduite telle quelle. Elle n'a pas été examinée par des pairs. Les processus éditoriaux du *Lancet* n'ont été appliqués qu'à l'original en anglais et c'est cette version qui doit servir de référence pour ce manuscrit.

Supplement to: Moseson H, Jayaweera R, Egwuatu I, et al. Effectiveness of self-managed medication abortion with accompaniment support in Argentina and Nigeria (SAFE): a prospective, observational cohort study and non-inferiority analysis with historical controls. *Lancet Glob Health* 2021; published online Nov 18. [http://dx.doi.org/10.1016/S2214-109X\(21\)00461-7](http://dx.doi.org/10.1016/S2214-109X(21)00461-7).

**Titre :** Efficacité de l'avortement médicamenteux autogéré et accompagné en Argentine et au Nigéria : étude prospective et comparative de cohorte et analyse de non-infériorité avec des témoins historiques

**Auteurs :** Heidi Moseson, PhD1\*, Ruvani Jayaweera, PhD1, Ijeoma Egwuatu, BS2, Belen Grosso, BA3, Ika Ayu Kristianingrum, MA4, Sybil Nmezi, MA2, Ruth Zurbriggen, MEd3, Relebohile Motana, PDM5, Chiara Bercu, MPA1, Sofia Carbone, MPH1, Caitlin Gerds, PhD1.

**Affiliations d'auteurs :**

1 Ibis Reproductive Health, 1736 Franklin Street, Suite 600, Oakland, Californie, États-Unis 94612

Initiative 2 générations pour les femmes et les jeunes, État de Lagos, Nigéria

3 La Revuelta Colectiva Feminista, Neuquén, Argentine

4 Samsara, Yogyakarta, Indonésie

5 Ibis Reproductive Health, Postnet Suite # 197, Private Bag X2600, Houghton 2041, Johannesburg, Afrique du Sud

**\*Auteur correspondant**

Heidi Moseson, PhD MPH

Ibis Reproductive Health

1736 Franklin Street, Suite 600

Oakland, CA 94612

Tel: +1.510.822.2696

Email: [hmoseson@ibisreproductivehealth.org](mailto:hmoseson@ibisreproductivehealth.org)

**Mots clés :** avortement, accompagnement, mifépristone, misoprostol, avortement autogéré

**Financement :** Fondation David et Lucile Packard.

Copyright © 2021 Les auteurs. Publié par Elsevier Ltd. Ceci est un article libre d'accès sous licence CC

BY 4.0.

## 25 **Résumé**

### 26 **Les essais en contexte cliniques ont établi la grande efficacité et l'innocuité de l'avortement**

27 **médicamenteux en milieu clinique.** Cependant, les obstacles aux soins d'avortement clinique ont  
28 déplacé la plupart des avortements médicamenteux vers des environnements hors clinique, en particulier  
29 dans le contexte de la pandémie de COVID-19. Compte tenu de ce changement, nous avons cherché à  
30 estimer l'efficacité de l'avortement médicamenteux autogéré (avortement médicamenteux sans soutien  
31 clinique) et à la comparer à l'efficacité de l'avortement médicamenteux géré par le clinicien.

32 **Méthodes** Pour cette étude de cohorte observationnelle prospective, nous avons recruté des appelantes de  
33 deux groupes d'accompagnement à l'avortement sécurisé en Argentine et au Nigeria qui ont demandé des  
34 informations sur l'avortement médicamenteux autogéré. Avant d'utiliser l'un des deux schémas  
35 thérapeutiques (misoprostol uniquement ou en association avec la mifépristone), les participantes ont  
36 rempli une enquête de référence, puis deux enquêtes téléphoniques de suivi 1 semaine et 3 semaines après  
37 la prise des pilules. Le critère de jugement principal était la proportion de participantes rapportant un  
38 avortement complet sans intervention chirurgicale. Des restrictions juridiques et éthiques ont empêché  
39 l'inscription d'un groupe témoin clinique simultané ; ainsi, une analyse de non-infériorité a comparé  
40 l'achèvement de l'avortement parmi ceux de notre cohorte d'avortement médicamenteux autogérés avec  
41 l'achèvement de l'avortement rapporté dans les essais cliniques historiques utilisant les mêmes schémas  
42 thérapeutiques, limités aux participantes ayant des grossesses de moins de 9 semaines de gestation. Cette  
43 étude a été enregistrée avec ISCRTN, ISRCTN95769543.

44 **Résultats** Entre le 31 juillet 2019 et le 27 avril 2020, nous avons inscrit 1051 participantes. Nous avons  
45 analysé les résultats de l'avortement pour 961 participantes, avec 47 participantes supplémentaires atteints  
46 après la période d'étude. La plupart des grossesses duraient moins de 12 semaines. Les participantes au  
47 suivi ont autogéré leurs avortements en utilisant le misoprostol seul (593 participantes) ou le régime  
48 combiné de misoprostol et de mifépristone (356 participantes). Au dernier suivi, 586 (99 %) utilisatrices  
49 de misoprostol seul et 334 (94 %) utilisatrices du régime combiné ont subi un avortement complet sans

50 intervention chirurgicale. Pour les grossesses de moins de 9 semaines de gestation, les deux schémas  
51 thérapeutiques n'étaient pas inférieurs à l'efficacité de l'avortement médicamenteux en milieu clinique.

52 **Interprétation** Les résultats de cette étude de cohorte prospective montrent que l'avortement  
53 médicamenteux autogéré avec le soutien d'un groupe d'accompagnement est très efficace et, pour les  
54 grossesses de moins de 9 semaines de gestation, non inférieur à l'efficacité de l'avortement  
55 médicamenteux géré par un clinicien administré dans un milieu clinique. Ces résultats soutiennent  
56 l'utilisation de modèles autogérés à distance de soins d'avortement précoce, y compris la télémédecine,  
57 comme cela est envisagé dans plusieurs pays en raison de la pandémie de COVID-19.

58

## **Recherche en contexte**

### **Preuve avant cette étude**

Pour comprendre ce que l'on sait de l'efficacité et de l'innocuité de l'avortement médicamenteux autogéré en dehors d'un cadre clinique, nous avons effectué une revue systématique de la littérature sur l'efficacité de l'avortement autogéré dans huit bases de données biomédicales et de santé publique en anglais et en espagnol, avec aucune limite de date ou de l'âge de la grossesse. Cette revue a déjà été publiée et a identifié huit études qui ont rapporté une efficacité élevée de l'avortement médicamenteux autogéré. Depuis la publication, plusieurs études supplémentaires sur l'efficacité de l'avortement autogéré ont été publiées. La plupart des études sont des analyses rétrospectives et rapportent des taux élevés d'avortement à la suite d'un avortement médicamenteux autogéré, selon l'âge gestationnel allant de 48,3 % à 99,1 %. Pour ce qui est de l'achèvement de l'avortement, dans la revue, nous avons identifié très peu d'études prospectives sur l'utilisation de l'avortement médicamenteux autogéré, et aucune étude évaluant formellement la non-infériorité de l'avortement médicamenteux autogéré par rapport à l'avortement médicamenteux clinique. De plus, peu d'études rapportent les raisons de la recherche de soins de santé après un avortement autogéré.

### **Valeur ajoutée à cette étude**

Les résultats de cette étude prospective multi-pays établissent que l'avortement médicamenteux autogéré avec de la Mifépristone et du Misoprostol, ainsi que du Misoprostol uniquement, est très efficace et sûr ; et pour celles dont la grossesse est inférieure à 9 semaines de gestation, le résultat n'est pas inférieur à l'efficacité de l'avortement médicamenteux en milieu clinique. Les personnes qui ont autogéré leur avortement avec un accompagnement ont réussi à accéder aux soins dans les cliniques et les hôpitaux, et l'ont principalement fait pour confirmer l'achèvement de l'avortement, et non pour un problème de sécurité.

#### 84 **Implications de toutes les preuves disponibles**

85 Les données de notre étude démontrent que l'avortement autogéré grâce au Misoprostol uniquement ou en  
86 association avec la Mifépristone est très efficace. Compte tenu de ces résultats et afin de garantir l'accès à  
87 un service médical sûr, efficace et routinier, les Ministères de la Santé, les organismes professionnels et  
88 les cliniciens eux-mêmes devraient supprimer les restrictions et les obstacles aux approches autogérées  
89 pour l'avortement médicamenteux et plutôt faciliter l'accès à des informations sur l'AM à travers une  
90 gamme de modèles de prestation de services, y compris l'auto-utilisation. Les résultats de cette étude  
91 suggèrent également que l'avortement autogéré avec le soutien d'un accompagnement peut être une  
92 stratégie de base pour élargir l'accès à des soins d'avortement sûrs et efficaces, quel que soit le cadre  
93 juridique.

## 94 INTRODUCTION

95 Les schémas thérapeutiques qui sont recommandés par l'Organisation Mondiale de la Santé  
96 (OMS) notamment le Mifépristone en association avec le Misoprostol, ou le Misoprostol uniquement,[1]  
97 sont des méthodes sûres et efficaces établies pour mettre un terme à la grossesse.[2-4] Les essais cliniques  
98 ont démontré des niveaux élevés d'efficacité et l'innocuité des deux schémas d'avortement médicamenteux  
99 (AM) au cours des 63 premiers jours de grossesse,[5, 6] et plus récemment jusqu'à 84 jours de  
100 grossesse.[7] Les données de ces essais ont été collectées dans des contextes de ressources élevées et  
101 faibles,[8] et parmi plusieurs cadres de prestataires cliniques.[9, 10]

102 L'AM est une méthode d'interruption de grossesse peu coûteuse, sûre, efficace et relativement  
103 simple. Cependant, les contextes juridiques restrictifs, le manque de prestataires formés ou disposés, le  
104 coût des services cliniques, les expériences de mauvais traitements dans les établissements de santé et  
105 d'autres problèmes logistiques et sociaux sont des obstacles persistants aux services d'avortement en  
106 clinique.[11] Par conséquent, l'utilisation majeure de l'AM dans le monde a lieu en dehors du cadre  
107 clinique.[12] L'utilisation de médicaments pour mettre un terme soi-même à une grossesse, sans  
108 supervision clinique, est appelée avortement autogéré.[11] Les exemples d'avortement autogéré vont de  
109 l'obtention de pilules en ligne ou dans une pharmacie locale et de l'utilisation de ces médicaments à  
110 domicile sans soutien clinique, à l'avortement autogéré soutenu par des groupes d'accompagnement pour  
111 un avortement sans risque - où des conseillers formés en avortement (dont la plupart n'ont pas de  
112 formation) fournissent des conseils fondés sur des preuves et un soutien centré (par téléphone ou en  
113 personne) à une personne qui gère elle-même un avortement. Le modèle d'accompagnement de  
114 l'avortement autogéré a émergé comme étant un domaine d'action sanitaire autonome et  
115 d'autodétermination à la suite des mouvements féministes en réponse à l'échec de l'État à fournir des soins  
116 d'avortement sécurisé, et se caractérise par des stratégies communautaires axées sur les activistes pour  
117 faciliter l'utilisation d'approches démedicalisées de médicaments largement disponibles.[13] Pour certains,

118 l'avortement médicamenteux autogéré est le modèle de soins préféré pour l'intimité et le confort qu'il offre  
119 ; pour d'autres, c'est la seule option lorsque les soins cliniques sont inaccessibles.[11]

120 Conformément aux essais cliniques qui ont établi l'innocuité et l'efficacité de l'AM, il existe de  
121 plus en plus de preuves démontrant l'efficacité et l'innocuité de l'avortement médicamenteux autogéré.[11,  
122 14, 15] Cependant, dans de nombreux cas, les limites de l'étude telles que le recours aux examens  
123 rétrospectifs des dossiers, la petite taille des échantillons et la perte de suivi ont compromis la pleine  
124 utilisation des résultats.[16] Les directives de l'OMS articulent le besoin de preuves sur l'innocuité,  
125 l'efficacité et l'acceptabilité de l'AM en dehors des contextes cliniques, en particulier pour les grossesses  
126 au-delà de 10 semaines de gestation, ainsi qu'un besoin de comprendre le rôle de l'individu dans l'auto-  
127 évaluation de l'éligibilité et l'achèvement de l'avortement — en particulier pour les prises uniques de  
128 Misoprostol, dont les données cliniques suggèrent qu'ils sont moins efficaces.[1] En outre, les appels à  
129 des données rigoureusement collectées sur les expériences des personnes en matière d'avortement  
130 autogéré et de recours aux soins pendant et après un avortement autogéré se sont multipliés ces dernières  
131 années.[12, 17]

132 Les groupes d'accompagnement à l'avortement offrent une plate-forme prometteuse pour une  
133 recherche prospective rigoureuse sur l'avortement médicamenteux autogéré.[18] Pour combler les lacunes  
134 dans la recherche sur l'avortement médicamenteux autogéré, nous avons entrepris une étude  
135 observationnelle prospective de cohorte pour estimer l'efficacité à la fois de la mifépristone en association  
136 avec le misoprostol (le schéma thérapeutique combiné) et des schémas thérapeutiques uniquement de  
137 misoprostol lorsqu'ils sont utilisés pour interrompre une grossesse sans supervision clinique, mais avec le  
138 soutien des groupes d'accompagnement, et pour comparer formellement cette efficacité à l'efficacité  
139 démontrée dans les essais cliniques historiques via une analyse de non-infériorité (en raison des  
140 restrictions légales sur l'avortement dans les deux sites, le recrutement d'un groupe-témoin clinique  
141 simultané était irréalisable et contraire à l'éthique) . Nous avons émis l'hypothèse selon laquelle  
142 l'efficacité de l'AM autogérée avec les deux schémas thérapeutiques serait élevée (supérieure à 90 %) et

que l'efficacité de l'AM autogérée ne serait pas inférieure à l'efficacité de l'AM mesurée en milieu clinique avec une marge de non-infériorité de 5 %.[16]

## MÉTHODES

### *Conception de l'étude et participantes*

L'étude Etudier la Faisabilité et l'Efficacité de l'Accompagnement (EFEA), une étude observationnelle et prospective de cohorte, a recruté des personnes qui ont contacté un groupe d'accompagnement à l'avortement afin d'obtenir des informations et un soutien sur l'avortement autogéré, et les a suivies pendant quatre semaines dans le but d'évaluer les résultats et les expériences d'avortement. Les résultats d'une étude pilote et les détails complets du protocole de l'étude ont déjà été publiés.[16, 18]

Nous avons recruté des appelantes pour deux groupes d'accompagnement à l'avortement - un en Argentine (basé à Neuquén, desservant principalement la province de Neuquén) et un au Nigeria (basé dans l'État de Lagos, desservant l'ensemble du pays). Au moment de la collecte des données, l'avortement était illégal dans les deux sites, à quelques exceptions près qui étaient soit celles de sauver la vie de la personne enceinte, [19] ou pour l'Argentine lorsque la grossesse était contractée à la suite d'un viol. [20] Toute personne ayant contacté l'un ou l'autre groupe au cours de la période d'étude dans le but de demander des informations concernant l'avortement provoqué pour soi-même a été examinée afin de déterminer son éligibilité. Toute personne âgée de > 13 ans, commençant un nouveau processus d'AM, sans contre-indications à l'AM1], et dans une fourchette d'âge gestationnel prise en charge par le groupe d'accompagnement – jusqu'à 24 semaines en Argentine et jusqu'à 15 semaines au Nigeria – était éligible.[16] Nous avons exclu celles présentant des symptômes persistants (saignements, crampes) d'une tentative d'avortement antérieure, des symptômes suggérant une grossesse extra-utérine ; et également celles qui ne voulaient pas ou ne pouvaient être contacté par le personnel de l'étude.

Toutes les participantes ont fourni un consentement verbal éclairé. Le comité d'examen des enquêtes d'Allendale a examiné et approuvé cette étude multi-pays, et la Fundación Huésped IRB a en outre approuvé le protocole spécifique à l'Argentine. Un Comité Indépendant de Surveillance de Données a examiné les protocoles, les instruments d'étude, ainsi qu'une analyse intermédiaire planifiée relative à tout aspects liés à la sûreté.

### *Procédures*

Au départ, toutes les participantes ont reçu des instructions étape par étape de la part des conseillers du groupe d'accompagnement sur le protocole approprié recommandé par l'OMS pour l'AM (tableau 1) - en fonction de la durée de la grossesse (évaluée via une échographie acquise indépendamment ou selon la date de la dernière période menstruelle), [1, 16] et à quels médicaments l'appelante pourrait avoir accès.

A la suite des conseils informatifs, les participantes ont répondu à un questionnaire de base administré par leur conseiller d'accompagnement. Pour toute collecte de données ultérieures, un coordinateur d'étude formé a contacté chaque participante à deux moments (une et trois semaines après la prise de la première dose de médicament) pour évaluer l'accès et l'utilisation de l'avortement médicamenteux, documenter les effets secondaires, les doses supplémentaires prises, l'achèvement de l'avortement, les complications potentielles et la recherche de soins de santé. Les participantes ont reçu 10-25 USD. Les procédures de l'étude étaient cohérentes sur les deux sites, à l'exception de la confirmation de la grossesse : des conseillers en Argentine ont proposé à un sous-ensemble de participantes sélectionné au hasard un test de grossesse urinaire pour confirmer la grossesse (non proposé au Nigéria).

### *Résultats*

Le critère de jugement principal était l'efficacité de l'AM autogérée avec accompagnement, calculée comme étant le pourcentage de répondantes qui ont déclaré un avortement complet sans intervention

chirurgicale, dans l'ensemble et par schéma médicamenteux. La recherche a établi que les gens sont capables d'auto-évaluer avec précision l'achèvement de l'avortement. [21] Le critère de jugement secondaire était une évaluation de la non-infériorité de l'efficacité de l'AM autogérée, par rapport à l'efficacité de l'AM telle que mesurée dans les essais cliniques historiques.

Les autres résultats mesurés comprenaient l'approvisionnement et l'utilisation des médicaments, les facteurs qui ont influencé l'auto-évaluation de l'achèvement de l'avortement, et le comportement de recherche de soins de santé ainsi que le traitement reçu. Nous avons également collecté des données sur l'âge, l'éducation, la confirmation de la grossesse et l'âge gestationnel des participantes.

#### *Analyses Statistiques*

Nous visions à estimer la proportion de participantes ayant subi un avortement complet autogéré sans intervention chirurgicale à l'aide de mifépristone et de misoprostol, ou alors de misoprostol uniquement ; et (2) évaluer si l'efficacité de l'AM autogérée n'est pas inférieure à l'efficacité de l'AM rapportée dans les essais cliniques historiques avec une marge de 5 %. [22-25]

Pour nos analyses principales, nous avons prédéfini l'exclusion des participantes ayant des résultats d'avortement inconnus, conformément aux essais cliniques de comparaison. [16, 22] La proportion de participantes à l'étude ayant subi un avortement complet a été évaluée en répondant à deux questions « Est-ce votre processus d'avortement est terminé ? », nous leur demandons également si elles ont signalé avoir reçu une aspiration manuelle intra-utérine « AMIU » ou une procédure de dilatation et de curetage « D&C ». Les participantes qui ont déclaré que leur avortement était terminé et n'ont pas déclaré avoir subi d'intervention chirurgicale ont été classées dans la catégorie « complète sans intervention chirurgicale » ; les participantes qui ont déclaré que leur avortement était terminé et ont également déclaré avoir reçu une AMIU ou un D&C ont été classées dans la catégorie « complètes avec intervention chirurgicale ». Les participantes qui ont déclaré que leur avortement n'était pas terminé ou ont déclaré ne pas savoir si leur avortement était terminé ont été classées dans la catégorie « Non

216 terminé/Incertain ». Nous avons calculé toutes les proportions dans l'ensemble, par schéma thérapeutique  
217 et par âge de la grossesse (<7 semaines, 7-9 semaines, 10-12 semaines et 13 semaines et au-delà). En  
218 raison de l'enregistrement différentiel de la mifépristone dans chaque pays et d'une grande prudence de la  
219 part des partenaires de mise en œuvre, nous ne rapportons pas le nombre d'utilisateurs de ce régime  
220 thérapeutique par pays. Les participantes des deux pays sont représentés dans chaque groupe de régime  
221 thérapeutique, ainsi, nous avons regroupé les pays pour calculer les principaux résultats.

222 Établir l'efficacité et la sécurité de l'avortement médicamenteux autogéré par rapport à  
223 l'avortement médicamenteux en milieu clinique est une lacune critique dans les preuves. En raison de  
224 restrictions légales, le recrutement d'un groupe de contrôle clinique simultané dans le cadre de l'étude  
225 SAFE était contraire à l'éthique et irréalisable. Ainsi, selon un précédent établi[26], nous avons identifié  
226 des ECR publiés précédemment sur l'efficacité de l'AM en milieu clinique pour servir de témoins  
227 historiques pour une analyse de non-infériorité : trois essais ont étudié le même schéma thérapeutique  
228 combiné [23-25], et un essai a étudié le même misoprostol -seul régime[22]. Il s'agissait des seuls essais  
229 identifiés où le schéma thérapeutique utilisé était identique aux schémas thérapeutiques recommandés par  
230 les groupes d'accompagnement, et tous sont largement cités dans les directives pertinentes relatives à  
231 l'avortement sécurisé.[1] Les contrôles historiques ne sont pas destinés à se substituer à la randomisation ;  
232 cependant, pour évaluer la comparabilité, nous avons testé les différences d'âge des participantes et de  
233 durée de grossesse dans l'étude SAFE par rapport aux témoins historiques à l'aide de tests t et de tests de  
234 proportion. Nous avons extrait les données sur l'achèvement de l'avortement à partir des résultats publiés  
235 des contrôles historiques.

236 Nous avons effectué deux tests de non-infériorité : un test pour les utilisatrices du misoprostol  
237 uniquement et un parmi les utilisateurs du régime combiné. Nous avons limité l'échantillon SAFE aux  
238 participantes ayant une grossesse de moins de 9 semaines de gestation pour correspondre aux critères  
239 d'éligibilité des études de comparaison. Les détails complets de l'analyse de non-infériorité ont été publiés  
240 précédemment [16] et sont détaillés dans l'annexe 6.

Les données ont été analysées avec le logiciel statistique STATA version 15.1. La taille minimale de l'échantillon cible était de 213 pour le régime combiné et de 419 pour le régime misoprostol pour un test unilatéral visant à évaluer si l'avortement médicamenteux autogéré avec soutien d'accompagnement n'est pas plus de 5 % moins efficace que chaque régime dans un cadre clinique, avec une puissance de 80 %, un alpha de 5 % et aucune corrélation au sein des conseillers (sur la base des résultats de l'étude pilote).[18] Cette étude est enregistrée à l'ISRCTN, ISRCTN95769543.

#### *Rôle de la source de financement*

Les bailleurs de fonds de l'étude n'ont joué aucun rôle dans la conception de l'étude, la collecte de données, l'analyse, l'interprétation ou la rédaction du rapport.

## **RÉSULTATS**

Les recruteurs de l'étude ont sélectionné 1237 appelantes pour leur éligibilité entre juillet 2019 et avril 2020 (Figure 1); 118 (9,5%) n'étaient pas éligibles car elles avaient besoin d'un soutien sans rapport avec l'avortement, avaient déjà commencé un processus d'AM ou présentaient des symptômes d'un avortement ou d'une fausse couche en cours. Parmi les 1119 éligibles, 1051 (93,9 %) se sont inscrites (n=401 d'Argentine, n=650 du Nigeria). Parmi les personnes inscrites, 961/1051 (91,4 %) ont effectué au moins un suivi et ont indiqué si elles avaient obtenu et pris les médicaments ou non. Parmi celles ayant au moins un contact de suivi, 929/961 (96,7 %) ont répondu à l'enquête d'une semaine et 846/961 (88,0 %) ont répondu à l'enquête de 3 semaines. Parmi les 90 participantes perdues après le référentiel, 47 ont été atteintes plus tard pour déterminer les principaux critères de jugement ; 43 avaient des résultats inconnus (4 %).

Les participantes étaient âgées de 14 à 50 ans, la plupart entre 20 et 29 ans (tableau 2). Les participantes argentines résidaient dans trois provinces (Neuquén, Río Negro et Salta); Les participantes nigérianes résidaient dans 28 États (le plus souvent Lagos, Imo et Abia). La plupart des participantes ont

confirmé leur grossesse avec un test de grossesse à domicile. Parmi un échantillon aléatoire de participantes qui ont fait des tests de grossesse à domicile au départ, deux (2%) des 102 tests étaient négatifs. Les participantes ont signalé des grossesses de 4 à 22 semaines de gestation au départ. La majorité des grossesses étaient inférieure à 12 semaines d'âge.

Après une semaine de suivi, 922 des participantes ont obtenu des médicaments et 919 ont pris ces médicaments, ceci inclut celles qui ont pris des médicaments inconnus (Annexe 6). Trois participantes ont déclaré avoir obtenu des pilules mais ne pas les avoir prises parce qu'elles avaient décidé de continuer avec la grossesse (trois [ $<1\%$ ] participantes). Pour les utilisatrices du régime combiné, toutes les participantes ont déclaré avoir pris la mifépristone en premier, et la plupart ont continué avec quatre comprimés de misoprostol (349/356, 98,0%), pris par voie sublinguale (274/356, 77,0% ; Annexe 6). Trois participantes (1 %) ont déclaré avoir pris une deuxième dose d'une seule pilule de mifépristone avant de continuer avec le misoprostol – ces trois participantes étaient à des durées de grossesse plus tardives (16, 17 et 19 semaines). Pour les utilisatrices du régime misoprostol uniquement, la plupart des participantes ont pris quatre comprimés pour les trois doses, presque toutes par voie sublinguale. Les participantes des deux pays étaient représentées dans chaque groupe de régime ; cependant, une majorité d'utilisatrices du régime combiné vivait en Argentine, tandis qu'une majorité d'utilisatrices de misoprostol en prise unique vivait au Nigéria.

Environ une semaine après la prise des pilules, 868 (94%) des (919) participantes ayant pris des médicaments et ayant fait le suivi durant 1 semaine ont signalé un avortement complet sans intervention chirurgicale (300 [92%] des 325 utilisatrices du régime combiné, et 566 [96%] utilisatrices de misoprostol uniquement), et un supplément de dix (1%) participantes ont signalé un avortement complet avec intervention chirurgicale (tableau 3). Lors du dernier suivi de l'étude, 922 (97 %) des 951 participantes ont signalé un avortement complet sans intervention chirurgicale, et 17 (2%) ont signalé un avortement complet avec intervention chirurgicale. L'achèvement de l'AM était élevé dans les deux

289 régimes. Parmi les utilisatrices du régime combiné, la fréquence d'interventions chirurgicales pour  
290 terminer l'avortement augmentait selon l'âge de la grossesse.

291 Les coordinateurs de l'étude ont atteint 47 (52%) des 90 participantes perdues de vue après la  
292 période d'étude d'enregistrement du critère de jugement principal. 39 ont rapporté que l'AM s'est achevé  
293 sans aucune intervention chirurgicale. Sous l'hypothèse prudente que les 43 (48%) participantes restantes  
294 qui étaient inaccessibles après leur inclusion n'ont pas eu d'avortement complet, l'achèvement global de  
295 l'avortement au dernier suivi tomberait à 961 (91 %) sur 1051 sans intervention chirurgicale. Après avoir  
296 inclus les interventions chirurgicales et les fausses couches parmi les personnes perdues de vue, 987 (94  
297 %) participantes n'étaient plus enceintes à la fin du suivi.

298 Au cours du suivi de l'étude, 192 (20 %) des 951 participantes ont demandé des soins de santé  
299 dans un hôpital ou une clinique (120 [34 %] utilisatrices du régime combiné, 71 [12 %] utilisatrices de  
300 misoprostol seul et [8 %] de participantes avec un régime d'avortement médicamenteux inconnu (annexe  
301 6). Parmi les participantes qui ont demandé des soins, la majorité l'a fait pour confirmer l'achèvement de  
302 l'avortement (157 [82 %] des 192 participantes). 21 [11%] des 192 participantes ont demandé des soins  
303 pour des problèmes liés à la douleur, aux saignements, à l'écoulement ou à la fièvre. Les participantes ont  
304 le plus souvent déclaré avoir reçu les traitements suivants : échographie (80 [8 %] des 951 participantes),  
305 analgésiques (25 [3 %] participantes), liquides intraveineux (19 [2 %] participantes) et des antibiotiques  
306 (16 [2 %] participantes). 17 (2 %) participantes ont déclaré avoir subi une aspiration manuelle ou une  
307 dilatation et un curetage, et 12 (1 %) ont déclaré avoir passé la nuit dans un établissement médical (toutes  
308 avaient une aspiration manuelle ou dilatation et curetage), et 6 (1 %) participantes ont déclaré avoir reçu  
309 une transfusion sanguine. Les participantes argentines étaient plus susceptibles d'obtenir une aspiration  
310 manuelle sous vide que les participantes nigérianes (différence de risque = 9,2 ; IC à 95 % : 3,4-15,0 ;  
311  $p = 0,0013$ ). 782 (82 %) des 951 participantes n'ont signalé aucun signe avant-coureur potentiel de  
312 complications, 84 (9 %) ont signalé des saignements qui imbibaient plus de deux serviettes hygiéniques  
313 par heure et duraient plus de deux heures, 80 (8 %) ont signalé des écoulements nauséabonds ou colorés,

50 (5 %) ont signalé une douleur qui interférait avec les activités normales, et 16 (2 %) ont signalé une fièvre supérieure à 38 °C pendant plus de 24 heures

Pour l'analyse de non-infériorité : 1 463 participantes évaluables dans les quatre études historiques comparatives témoins avaient des grossesses de moins de 9 semaines de gestation, résidaient dans l'un des 11 pays et ont été randomisés dans le même schéma d'AM étudié dans l'étude SAFE (n = 951 avec traitement, n=517 avec le misoprostol), et ont été comparés à 779 participantes SAFE ayant des grossesses de moins de 9 semaines de gestation (275 avec le régime combiné, 504 avec le régime unique). Les participantes à l'étude SAFE et aux études de contrôle historiques étaient similaires par régime médicamenteux, bien que les participantes SAFE étaient légèrement plus âgées (1 à 3 ans en moyenne) et avait des grossesses légèrement plus jeunes (~ une semaine en moyenne) (Annexe 5).

Parmi les utilisatrices du régime combiné, l'achèvement de l'avortement parmi les participantes SAFE à moins de 9 semaines de gestation était de 96% (265 des 275 participantes), par rapport à un niveau d'achèvement combiné de 94% (898 des 951 participantes) dans les trois groupes témoins historiques (différence de risque = 1-1.9%, 95%CI: -4.6 to 0.7%; Figure 2 et annexe 6)[23-25]. L'achèvement de l'avortement parmi les participantes SAFE au régime unique à moins de 9 semaines de gestation était de 99,0 % (499 de 504 participantes), contre 84 % d'achèvement signalé dans le groupe historique apparié témoin (différence de risque = -14.8%, 95%CI: -18.1 to -11.6% ; Figure 2 et annexe 6).[22] Étant donné que les limites supérieures des 95% des intervalles de confiance entre la différence de risque entre l'avortement autogéré et l'avortement contrôlé cliniquement pour les deux schémas thérapeutiques sont inférieures à la marge de non-infériorité spécifiée de 5 %, nous rejetons l'hypothèse nulle d'infériorité.

## DISCUSSION

Les résultats de cette étude de cohorte observationnelle prospective démontrent que l'AM autogérée avec soutien du groupe d'accompagnement est très efficace et, pour les grossesses de moins de 9 semaines de

gestation, les résultats sont non inférieure à l'efficacité de l'AM administrée en milieu clinique. Sur environ quatre semaines de suivi, la majorité des participantes ont obtenu des médicaments, les ont pris conformément aux protocoles conformes à ceux de l'OMS et ont terminé leurs avortements ; une minorité a demandé des soins de santé dans une clinique ou un hôpital, principalement pour confirmer l'achèvement de l'avortement.

Nos résultats contribuent à une base de preuves croissante sur l'efficacité et la sécurité de l'avortement autogéré grâce à des médicaments, avec ou sans soutien d'accompagnement. [11, 14-16] Pris ensemble, ces résultats ont plusieurs implications générales. Premièrement, les résultats de l'étude SAFE s'ajoutent à un solide corpus de preuves que l'AM est efficace dans une gamme de modèles de prestation de services dans des contextes cliniques et non cliniques. L'innocuité et l'efficacité de l'AM ont été bien établies dans un éventail de milieux soutenus par les agents de santé, y compris les milieux cliniques traditionnels, [3, 22-25] les paramètres de télémédecine (assistance du clinicien par appel vidéo), [27] et les milieux autogérés avec soutien en pharmacie [15]. Ces résultats démontrent que l'AM est également efficace lorsqu'elle est autogérée à domicile avec des informations fournies par des conseillers en avortement non formés en clinique.

De plus, les résultats de l'étude SAFE indiquent que l'AM autogérée avec accompagnement est sûr , et que les conseillers en avortement non formés cliniquement peuvent aider les personnes à comprendre quand et comment accéder aux soins si elles en ont besoin ou le souhaitent pendant un avortement autogéré. Les différences observées dans l'AMIU par pays peuvent être dues à des différences d'accessibilité de ce service selon le pays, ainsi qu'à des différences dans les relations entre les groupes d'accompagnement et les prestataires de soins de confiance. Bien que nous ne puissions pas être sûrs que tous ceux qui auraient pu vouloir se faire soigner l'aient fait, nos données suggèrent que les gens ont pu accéder aux soins lorsque cela était nécessaire. Du point de vue de la mesure, ces résultats remettent en question l'idée que toute visite dans un établissement de santé pendant ou après un avortement autogéré devrait être mesurée comme une complication de l'avortement ; et du point de vue de la prestation de

soins, ces résultats devraient encourager les systèmes de santé à reconsidérer la meilleure façon de soutenir les personnes qui s'autogèrent.

Il convient de noter que l'efficacité du misoprostol dans l'étude SAFE est supérieure à celle généralement rapportée dans les essais cliniques.[6] Les résultats de cette étude, cependant, sont cohérents avec les niveaux d'efficacité de 92,6 à 96,4 % rapportés dans des études récentes sur l'avortement autogéré avec du misoprostol.[14, 15, 18] L'efficacité plus élevée du misoprostol observée dans les études sur les contextes autogérés peuvent être attribués aux facteurs suivants : tout d'abord, les études sur l'AM autogérée ont généralement évalué l'achèvement de l'avortement sur une période de 3 à 4 semaines, par rapport à la période beaucoup plus courte de 1 à 2 semaines dans les essais cliniques.[ 28] De plus, dans les essais cliniques, les participantes dont les avortements sont en cours, incomplets, manqués ou échoués au moment de l'évaluation des résultats sont généralement recommandés pour une intervention chirurgicale (par exemple [22]) tandis que les participantes dans des contextes d'autogestion sont plus susceptibles d'être conseillé dans une approche de prise en charge expectative ou conseillé de prendre des doses supplémentaires de misoprostol - conformément aux directives de l'OMS[1] - avant de demander des soins médicaux supplémentaires.[28] Enfin, tant dans l'étude SAFE que dans d'autres études hors clinique, les participantes à l'étude avaient accès à la demande des conseillers en avortement qui étaient disponibles comme ressource pour des questions de saignements normaux et les effets secondaires, et pour avoir une orientation vers des soins en cas de complications possibles. Il a été démontré que ce type de communication de soutien régulier aide les clientes à l'avortement à se sentir mieux préparées à leur expérience d'avortement[29] et peut avoir contribué à une meilleure compréhension et à une meilleure capacité à permettre au processus d'AM de suivre son cours. Compte tenu de l'efficacité plus élevée des schémas thérapeutiques à base de misoprostol signalés dans les contextes d'avortement autogérés par rapport aux contextes cliniques, des recherches supplémentaires sont nécessaires pour explorer comment des protocoles ajustés, ainsi qu'un meilleur conseil et un meilleur soutien aux clientes ayant subi un avortement en milieu clinique peuvent maximiser l'efficacité de régimes à base de misoprostol.

Mener une étude prospective auprès des personnes qui gèrent elles-mêmes des avortements dans des contextes restrictifs présente certains défis. Notamment, la conception de l'étude reposait sur l'âge gestationnel autodéclaré et les résultats de l'avortement ; résultats généralement confirmés par échographie dans les études cliniques. Le recours à l'auto-évaluation pour ces caractéristiques et résultats d'éligibilité, cependant est informé par des recherches qui ont démontré l'exactitude du rapport de la dernière période menstruelle par rapport à l'évaluation échographique, [30] et l'efficacité et la sécurité de l'AMM sans échographie de dépistage. [31] En effet, les directives techniques de l'OMS n'exigent pas de confirmation échographique de l'âge gestationnel pour l'AM précoce. [1] De plus, des études menées dans divers contextes ont démontré la fiabilité de l'auto-évaluation de l'achèvement de l'avortement. [21] Enfin, étant donné les restrictions légales pour l'avortement dans les deux sites, il était impossible de procéder à un contrôle clinique simultané. Nous nous sommes donc appuyés sur des emprunts à des essais cliniques historiques qui ont étudié les mêmes schémas thérapeutiques dans la même tranche d'âge gestationnel[22-25] - une approche analytique pour laquelle il existe de solides précédents.[26] Bien que nous ayons observé des différences mineures dans deux caractéristiques de base entre les cohortes de l'étude SAFE et les témoins historiques, sur la base de la littérature existante et d'une méta-analyse de l'efficacité du régime à différents âges gestationnels, nous n'anticipons pas une différence de plusieurs jours de gestation en dessous de 9 semaines ni une différence d'âge des participantes entre 1 et 3 ans pour entraîner des différences majeures dans l'achèvement de l'avortement.[32] Enfin, cette étude n'a pas été conçue pour comparer le régime combiné au misoprostol; mais plutôt, pour évaluer l'efficacité individuelle de chaque régime dans le contexte d'autogestion par rapport à la littérature publiée sur l'AM dans un cadre clinique. Nous mettons donc en garde les lecteurs contre l'établissement de comparaisons entre les résultats rapportés pour ce qui est du régime combiné par rapport au régime misoprostol de l'étude SAFE. Ces limites sont contrebalancées par la nature unique de l'échantillon de l'étude qui nous a permis de suivre de manière prospective les participantes qui autogérait un avortement dans deux contextes distincts, l'échantillon large et suffisamment puissant et la faible perte de suivi.

413           En conclusion, l'AM autogérée avec accompagnement est très efficace et sûre. À l'avenir, les  
414 gouvernements, les organismes professionnels et les cliniciens devraient s'appuyer sur des preuves pour  
415 orienter leurs politiques et leurs pratiques vers des approches autogérées pour l'AM, et se concentrer sur  
416 l'élargissement de l'accès à l'AM à travers une gamme de modèles de prestation de services, y compris  
417 l'auto-utilisation.

#### 418 **Déclaration de contribution de l'auteur**

419 BG, CG, HM, IAK, IE, RJ, RM, RZ et SN ont contribué à la conceptualisation et à la conception de  
420 l'étude quantitative, CB, HM, RJ, RM et SC ont géré la collecte et la qualité des données, et HM et RJ ont  
421 mené la analyses. HM a dirigé la rédaction du manuscrit, avec les contributions, la révision et  
422 l'approbation de tous les auteurs. Tous les auteurs ont lu et approuvé le manuscrit final. Tous les auteurs  
423 ont eu accès à toutes les données de l'étude, et deux auteurs (HM et RJ) ont consulté et vérifié les  
424 données. CG, HM et RJ étaient responsables de la décision de soumettre le manuscrit.

425

#### 426 **Declaration d'intérêt**

427 Nous déclarons aucun effet concurrent

428

#### 429 **Déclaration de partage de données**

430 Le protocole d'étude, le plan d'analyse et les instruments sont disponibles en ligne pour la communauté  
431 scientifique (<https://bmjopen.bmj.com/content/10/11/e036800>). Toutes les demandes de données doivent  
432 être soumises au chercheur principal par courrier électronique ([hmoseson@ibisreproductivehealth.org](mailto:hmoseson@ibisreproductivehealth.org))  
433 pour examen. L'accès aux données anonymes peut être accordé après examen et approbation d'une note  
434 conceptuelle initiée par l'investigateur par le chercheur principal et le comité de surveillance et de  
435 surveillance des données, et après que l'investigateur a signé un accord d'accès aux données.

436

#### 437 **Remerciements**

438 Cette étude a été financée par une subvention de la Fondation David et Lucile Packard à CG, HM et RJ.  
439 HM est en partie soutenu par une subvention du National Institute of Health (1R21CA256759-01). Nous

440 sommes reconnaissants vis-à-vis des participantes à l'étude d'avoir partagé des informations sur leurs  
441 processus d'avortement autogérés avec l'équipe d'étude. Nous remercions également Ilana Dzuba, Sofia  
442 Filippa, Brianna Keefe-Oates, Onikepe Owolabi, Maria Yasinta et l'équipe de La Revuelta pour leurs  
443 formidables contributions à ce travail sous diverses formes

- 445 1. WHO. Medical Management of Abortion Geneva, Switzerland: World Health Organization; 2018  
446 [Available from: <https://apps.who.int/iris/bitstream/handle/10665/278968/9789241550406-eng.pdf?ua=1>.
- 447 2. Rodriguez MI, Seuc A, Kapp N, von Hertzen H, Huong NT, Wojdyla D, et al. Acceptability of  
448 misoprostol-only medical termination of pregnancy compared with vacuum aspiration: an international,  
449 multicentre trial. *BJOG*. 2012;119(7):817-23. DOI: 10.1111/j.1471-0528.2012.03310.x.
- 450 3. Winikoff B, Sivin I, Coyaji KJ, Cabezas E, Bilian X, Sujuan G, et al. Safety, efficacy, and  
451 acceptability of medical abortion in China, Cuba, and India: A comparative trial of mifepristone-  
452 misoprostol versus surgical abortion. *Am J Obstet Gynecol*. 1997;176(2):431-7. DOI: 10.1016/s0002-  
453 9378(97)70511-8.
- 454 4. Kulier R, Kapp N, Gulmezoglu AM, Hofmeyr GJ, Cheng L, Campana A. Medical methods for  
455 first trimester abortion. *Cochrane Database Syst Rev*. 2011(11):CD002855. DOI:  
456 10.1002/14651858.CD002855.pub4.
- 457 5. Chen MJ, Creinin MD. Mifepristone With Buccal Misoprostol for Medical Abortion: A  
458 Systematic Review. *Obstet Gynecol*. 2015;126(1):12-21. DOI: 10.1097/AOG.0000000000000897.
- 459 6. Raymond EG, Harrison MS, Weaver MA. Efficacy of Misoprostol Alone for First-Trimester  
460 Medical Abortion: A Systematic Review. *Obstet Gynecol*. 2019;133(1):137-47. DOI:  
461 10.1097/AOG.0000000000003017.
- 462 7. Kapp N, Eckersberger E, Lavelanet A, Rodriguez MI. Medical abortion in the late first trimester:  
463 a systematic review. *Contraception*. 2019;99(2):77-86. DOI: 10.1016/j.contraception.2018.11.002.
- 464 8. Ferguson I, Scott H. Systematic Review of the Effectiveness, Safety, and Acceptability of  
465 Mifepristone and Misoprostol for Medical Abortion in Low- and Middle-Income Countries. *J Obstet*  
466 *Gynaecol Can*. 2020;42(12):1532-42 e2. DOI: 10.1016/j.jogc.2020.04.006.
- 467 9. Rocca CH, Puri M, Shrestha P, Blum M, Maharjan D, Grossman D, et al. Effectiveness and  
468 safety of early medication abortion provided in pharmacies by auxiliary nurse-midwives: A non-  
469 inferiority study in Nepal. *PLoS One*. 2018;13(1):e0191174. DOI: 10.1371/journal.pone.0191174.
- 470 10. Starrs AM, Ezech AC, Barker G, Basu A, Bertrand JT, Blum R, et al. Accelerate progress—sexual  
471 and reproductive health and rights for all: report of the Guttmacher–Lancet Commission. *The Lancet*.  
472 2018;391(10140):2642-92. DOI: 10.1016/s0140-6736(18)30293-9.
- 473 11. Moseson H, Herold S, Filippa S, Barr-Walker J, Baum SE, Gerdt C. Self-managed abortion: A  
474 systematic scoping review. *Best Practice & Research Clinical Obstetrics & Gynaecology*. 2019. DOI:  
475 10.1016/j.bpobgyn.2019.08.002.
- 476 12. Ganatra B, Gerdt C, Rossier C, Johnson Jr B, Tuncalp O, Assifi A, et al. Global, regional, and  
477 subregional classification of abortions by safety, 2010-14: estimates from a Bayesian hierarchical model.  
478 *Lancet*. 2017;390:2372-81. DOI: [http://dx.doi.org/10.1016/S0140-6736\(17\)31794-4](http://dx.doi.org/10.1016/S0140-6736(17)31794-4).
- 479 13. Braine N. Autonomous Health Movements: Criminalization, De-medicalization, and  
480 Community-Based Direct Action. *Health Hum Rights*. 2020;22(2):85-97. DOI.
- 481 14. Foster AM, Arnott G, Hobstetter M. Community-based distribution of misoprostol for early  
482 abortion: evaluation of a program along the Thailand Burma border. *Contraception*. 2017;96(4):242-7.  
483 DOI: 10.1016/j.contraception.2017.06.006.
- 484 15. Stillman M, Owolabi O, Akinyemi A, Moore A, Bankole A, Fatusi A, et al. Women's self-  
485 reported experiences using misoprostol obtained from drug sellers: a prospective cohort study in Lagos  
486 State, Nigeria. *BMJ Open*. 2020(IN PRESS). DOI.
- 487 16. Moseson H, Keefe-Oates B, Jayaweera RT, Filippa S, Motana R, Bercu C, et al. Studying  
488 Accompaniment model Feasibility and Effectiveness (SAFE) Study: study protocol for a prospective  
489 observational cohort study of the effectiveness of self-managed medication abortion. *BMJ Open*.  
490 2020;10(11):e036800. DOI: 10.1136/bmjopen-2020-036800.

17. Ralph L, Foster DG, Raifman S, Biggs MA, Samari G, Upadhyay U, et al. Prevalence of Self-Managed Abortion Among Women of Reproductive Age in the United States. *JAMA Netw Open*. 2020;3(12):e2029245. DOI: 10.1001/jamanetworkopen.2020.29245.
18. Moseson H, Jayaweera R, Raifman S, Keefe-Oates B, Filippa S, Motana R, et al. Self-managed medication abortion outcomes: results from a prospective pilot study. *Reprod Health*. 2020;17(1):164. DOI: 10.1186/s12978-020-01016-4.
19. Okorie PC, Abayomi OA. Abortion laws in Nigeria: A Case for Reform. *Annual Survey of International and Comparative Law*. 2019;23(1):165-92. DOI.
20. Código Penal de la Nación Argentina, (1984).
21. Schmidt-Hansen M, Cameron S, Lohr PA, Hasler E. Follow-up strategies to confirm the success of medical abortion of pregnancies up to 10 weeks' gestation: A systematic review with meta-analyses. *Am J Obstet Gynecol*. 2019. DOI: 10.1016/j.ajog.2019.11.1244.
22. von Hertzen H, Piaggio G, Huong NTM, Arustamyan K, Cabezas E, Gomez M, et al. Efficacy of two intervals and two routes of administration of misoprostol for termination of early pregnancy: a randomised controlled equivalence trial. *The Lancet*. 2007;369(9577):1938-46. DOI: 10.1016/s0140-6736(07)60914-3.
23. von Hertzen H, Huong NT, Piaggio G, Bayalag M, Cabezas E, Fang AH, et al. Misoprostol dose and route after mifepristone for early medical abortion: a randomised controlled noninferiority trial. *BJOG*. 2010;117(10):1186-96. DOI: 10.1111/j.1471-0528.2010.02636.x.
24. Tang OS, Chan CC, Ng EH, Lee SW, Ho PC. A prospective, randomized, placebo-controlled trial on the use of mifepristone with sublingual or vaginal misoprostol for medical abortions of less than 9 weeks gestation. *Hum Reprod*. 2003;18(11):2315-8. DOI: 10.1093/humrep/deg475.
25. Tang OS, Xu J, Cheng L, Lee SW, Ho PC. Pilot study on the use of sublingual misoprostol with mifepristone in termination of first trimester pregnancy up to 9 weeks gestation. *Hum Reprod*. 2002;17(7):1738-40. DOI: 10.1093/humrep/17.7.1738.
26. Viele K, Berry S, Neuenschwander B, Amzal B, Chen F, Enas N, et al. Use of historical control data for assessing treatment effects in clinical trials. *Pharm Stat*. 2014;13(1):41-54. DOI: 10.1002/pst.1589.
27. Aiken A, Lohr PA, Lord J, Ghosh N, Starling J. Effectiveness, safety and acceptability of no-test medical abortion provided via telemedicine: a national cohort study. *BJOG*. 2021. DOI: 10.1111/1471-0528.16668.
28. Jayaweera RT, Moseson H, Gerds C. Misoprostol in the era of COVID-19: a love letter to the original medical abortion pill. *Sex Reprod Health Matters*. 2020;28(1):1829406. DOI: 10.1080/26410397.2020.1829406.
29. Gerds C, Jayaweera RT, Kristianingrum IA, Khan Z, Hudaya I. Effect of a smartphone intervention on self-managed medication abortion experiences among safe-abortion hotline clients in Indonesia: A randomized controlled trial. *Int J Gynaecol Obstet*. 2020;149(1):48-55. DOI: 10.1002/ijgo.13086.
30. Bracken H, Clark W, Lichtenberg ES, Schweikert SM, Tanenhaus J, Barajas A, et al. Alternatives to routine ultrasound for eligibility assessment prior to early termination of pregnancy with mifepristone-misoprostol. *BJOG*. 2011;118(1):17-23. DOI: 10.1111/j.1471-0528.2010.02753.x.
31. Raymond E, Chong E, Winikoff B, Platais I, Mary M, Lotarevich T, et al. TelAbortion: evaluation of a direct to patient telemedicine abortion service in the United States. *Contraception*. 2019;100(3):173-7. DOI: 10.1016/j.contraception.2019.05.013.
32. Ashok PW, Templeton A, Wagaarachchi PT, Flett GM. Factors affecting the outcome of early medical abortion: a review of 4132 consecutive cases. *BJOG*. 2002;109(11):1281-9. DOI: 10.1046/j.1471-0528.2002.02156.x.

| <b>Durée de la Grossesse</b> | <b>Mifepristone + Misoprostol</b>                                                                                                                                                                                                                                                                                                                                                                                                                                                                                                 | <b>Misoprostol-uniquement</b>                                                                                                                                                                                                                                                                                                                                                                                                                                                                                                                                                                                                                                                                                                          |
|------------------------------|-----------------------------------------------------------------------------------------------------------------------------------------------------------------------------------------------------------------------------------------------------------------------------------------------------------------------------------------------------------------------------------------------------------------------------------------------------------------------------------------------------------------------------------|----------------------------------------------------------------------------------------------------------------------------------------------------------------------------------------------------------------------------------------------------------------------------------------------------------------------------------------------------------------------------------------------------------------------------------------------------------------------------------------------------------------------------------------------------------------------------------------------------------------------------------------------------------------------------------------------------------------------------------------|
| Jusqu'à 90 jours             | Avalez 1 comprimé de mifépristone (200 mg) par voie orale ; Après 24-48 heures, mettez 4 comprimés de misoprostol (800mcg) sous la langue (sublingual) et laissez-les se dissoudre pendant 30 minutes. Continuez à avaler de la salive jusqu'à ce que les pilules se dissolvent. Si après trois heures il n'y a aucun signe réactif d'effet secondaire ou d'expulsion, mettez 2 comprimés de misoprostol supplémentaires (400 mcg) sous la langue ou dans le vagin et laissez-les se dissoudre                                    | Mettez 4 comprimés (800mcg) sous la langue (sublinguale) et laissez-les se dissoudre pendant 30 minutes, continuez à avaler de la salive jusqu'à ce que les comprimés se dissolvent. Après 3 heures, mettez la deuxième dose de 4 comprimés (800 mcg) sous la langue et laissez-les se dissoudre pendant 30 minutes. Continuez à avaler de la salive jusqu'à ce que les pilules se dissolvent. Après 3 heures, mettez une troisième dose de 4 comprimés (800 mcg) sous la langue et laissez-les se dissoudre pendant 30 minutes. Continuez à avaler de la salive jusqu'à ce que les pilules se dissolvent. Continuez avec 2 à 4 comprimés de misoprostol sous la langue toutes les trois heures jusqu'à ce que l'expulsion se produise |
| Au-delà de 90 jours*         | Avalez 1 comprimé de mifépristone (200 mg) par voie orale ; Après 36-48 heures, mettez 2 comprimés de misoprostol (400mcg) sous la langue (sublinguale) et laissez-les se dissoudre pendant 30 minutes. Continuez à avaler de la salive jusqu'à ce que les pilules se dissolvent. Après 3 heures, mettez 2 comprimés supplémentaire de misoprostol (400 mcg) sous la langue et laissez-les se dissoudre ; Continuer avec 2 comprimés de misoprostol sous la langue toutes les trois heures jusqu'à ce que l'expulsion se produise | Mettez 2 comprimés (400mcg) sous la langue (sublinguale) et laissez-les se dissoudre pendant 30 minutes, continuez à avaler de la salive jusqu'à ce que les comprimés se dissolvent. Après 3 heures, mettez la deuxième dose de 2 comprimés (400mcg) sous la langue et laissez-les se dissoudre pendant 30 minutes. Continuez à avaler de la salive jusqu'à ce que les pilules se dissolvent. Après 3 heures, mettez une troisième dose de 2 comprimés (400mcg) sous la langue et laissez-les se dissoudre pendant 30 minutes. Continuez à avaler de la salive jusqu'à ce que les pilules se dissolvent. Continuer avec 2 comprimés de misoprostol sous la langue toutes les trois heures jusqu'à ce que l'expulsion se produise       |

540 \* Des détails supplémentaires sur les procédures d'avortement autogéré accompagné au-delà de 12  
541 semaines peuvent être trouvés ailleurs (par exemple, Zurbriggen R, Keefe-Oates B, Gerds C.  
542 Accompagnement des avortements du deuxième trimestre : le modèle du réseau féministe Socorrasta  
543 d'Argentine. Contraception. 2018, 97 (2) : 108-15. DOI : 10.1016 / j.contraception.2017.07.170 ;  
544 Moseson et al, Efficacité de l'avortement médicamenteux autogéré entre 13 et 24 semaines de gestation :  
545 une revue rétrospective des dossiers de cas des groupes d'accompagnement en Argentine, au Chili et en  
546 Équateur. Contraception. 2020. DOI : 10.1016 / j.contraception.2020.04.015)

**Figure 1. Flux de Recrutement**

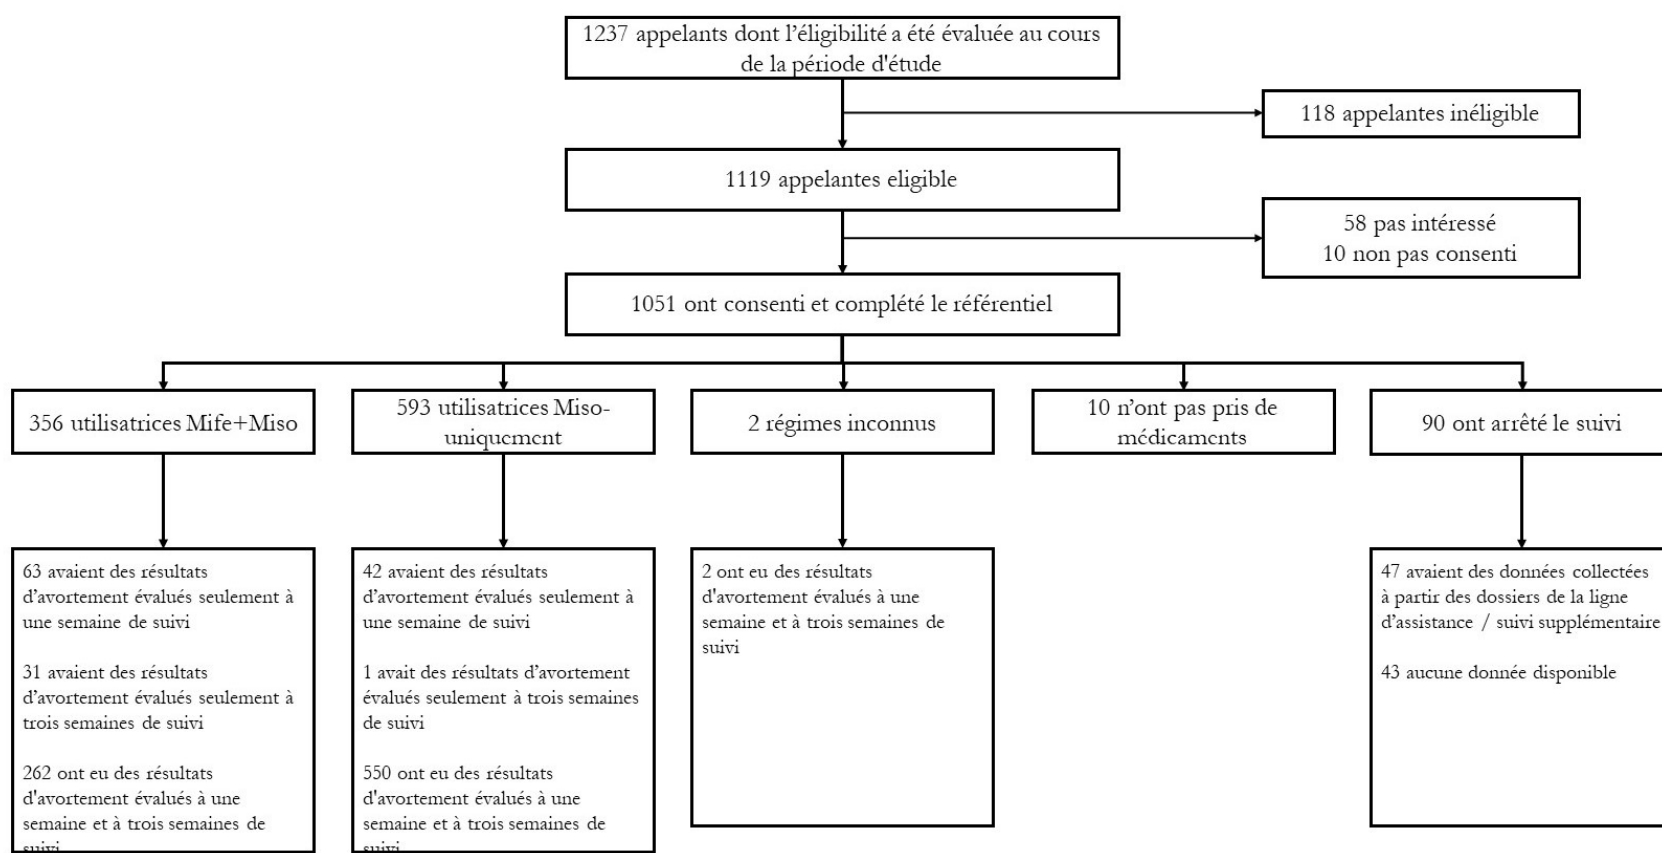

**Tableau 2. Caractéristiques sociodémographiques et grossesse des participantes**

|                                                         | Tous les Régimes |       | Mife+Miso |       | Misoprostol alone |       | Inconnu |        |
|---------------------------------------------------------|------------------|-------|-----------|-------|-------------------|-------|---------|--------|
|                                                         | n                | %     | n         | %     | n                 | %     | n       | %      |
| <i>N au référentiel</i>                                 | 1051             | 100   | 356       | 100   | 593               | 100   | 102     | 100    |
| <b>Ages des Participantes (années)</b>                  |                  |       |           |       |                   |       |         |        |
| Moyenne d'âge des participantes (SD)                    | 28.1             | (6.0) | 27.5      | (6.3) | 28.5              | (5.8) | 33.0    | (12.7) |
| 14ans                                                   | 2                | 0.2   | 2         | 0.6   | 0                 | 0     | 0       | 0.0    |
| 15-19ans                                                | 50               | 4.8   | 27        | 7.6   | 17                | 2.9   | 6       | 5.9    |
| 20-24ans                                                | 271              | 25.8  | 101       | 28.4  | 136               | 22.9  | 34      | 33.3   |
| 25-29ans                                                | 340              | 32.4  | 103       | 28.9  | 214               | 36.1  | 23      | 22.5   |
| 30-34ans                                                | 211              | 20.1  | 73        | 20.5  | 116               | 19.6  | 22      | 21.6   |
| 35-39ans                                                | 137              | 13    | 35        | 9.8   | 89                | 15    | 13      | 12.7   |
| 40-44ans                                                | 36               | 3.4   | 15        | 4.2   | 18                | 3     | 3       | 2.9    |
| 45-49ans                                                | 3                | 0.3   | 0         | 0     | 2                 | 0.3   | 1       | 1.0    |
| 50ans                                                   | 1                | 0.1   | 0         | 0     | 1                 | 0.2   | 0       | 0.0    |
| <b>Niveau d'éducation</b>                               |                  |       |           |       |                   |       |         |        |
| Pas scolarisé                                           | 2                | 0.2   | 2         | 0.6   | 0                 | 0     | 0       |        |
| A terminé l'école primaire                              | 134              | 12.7  | 97        | 27.2  | 14                | 2.4   | 23      | 22.5   |
| A terminé l'école secondaire                            | 397              | 37.8  | 117       | 32.9  | 248               | 41.8  | 32      | 31.4   |
| Plus que l'école secondaire                             | 518              | 49.3  | 140       | 39.3  | 331               | 55.8  | 47      | 46.1   |
| <b>Confirmation de la grossesse (sélectionnez tout)</b> |                  |       |           |       |                   |       |         |        |
| A fait le test de grossesse à la maison                 | 700              | 66.6  | 292       | 82    | 334               | 56.3  | 74      | 72.5   |
| Prise de sang dans un centre de santé                   | 285              | 27.1  | 55        | 15.4  | 205               | 34.6  | 25      | 24.5   |
| Prise d'urine dans un centre de santé                   | 114              | 10.8  | 2         | 0.6   | 105               | 17.7  | 7       | 6.9    |
| Ultrason                                                | 113              | 10.8  | 89        | 25    | 7                 | 1.2   | 17      | 16.7   |
| Retard/Absence de menstruations                         | 37               | 3.5   | 31        | 8.7   | 1                 | 0.2   | 5       | 4.9    |
| Symptômes de grossesse                                  | 13               | 1.2   | 11        | 3.1   | 0                 | 0     | 2       | 2.0    |
| Autre                                                   | 1                | 0.1   | 0         | 0     | 0                 | 0     | 1       | 1.0    |
| <b>Durée de la grossesse</b>                            |                  |       |           |       |                   |       |         |        |
| Durée moyenne de la grossesse (SD)                      | 7.0              | (2.2) | 7.6       | (2.6) | 6.7               | (1.8) | 7.0     | (1.4)  |
| < 7 semaines                                            | 518              | 49.3  | 141       | 39.6  | 330               | 55.6  | 47      | 46.1   |
| [7-9) semaines                                          | 340              | 32.4  | 134       | 37.6  | 174               | 29.3  | 32      | 31.4   |
| [9-12) semaines                                         | 141              | 13.4  | 50        | 14    | 75                | 12.6  | 16      | 15.7   |
| [12-22] semaines                                        | 52               | 4.9   | 31        | 8.7   | 14                | 2.4   | 7       | 6.9    |

**Tableau 3. Réalisation de l'Avortement**

| Achèvement de l'avortement                   | Tout Régime <sup>1</sup>    |    | Mifepristone + Misoprostol |              |                |                |                |                 |               |                  | Misoprostol alone |                   |                |              |                |                |                |                 |               |                  |               |     |
|----------------------------------------------|-----------------------------|----|----------------------------|--------------|----------------|----------------|----------------|-----------------|---------------|------------------|-------------------|-------------------|----------------|--------------|----------------|----------------|----------------|-----------------|---------------|------------------|---------------|-----|
|                                              | Toutes Gestations           |    | Toutes gestations          | < 7 semaines |                | [7-9) semaines |                | [9-12) semaines |               | [12-22] semaines |                   | Toutes gestations |                | < 7 semaines |                | [7-9) semaines |                | [9-12) semaines |               | [12-22] semaines |               |     |
| Une semaine après la prise des médicaments : | <i>n = 919</i> <sup>2</sup> | %  | <i>n = 325</i>             | %            | <i>n = 132</i> | %              | <i>n = 122</i> | %               | <i>n = 45</i> | %                | <i>n = 26</i>     | %                 | <i>n = 592</i> | %            | <i>n = 329</i> | %              | <i>n = 174</i> | %               | <i>n = 75</i> | %                | <i>n = 14</i> | %   |
| Achevé sans intervention chirurgicale        | 868                         | 94 | 300                        | 92           | 126            | 96             | 112            | 92              | 41            | 91               | 21                | 81                | 566            | 96           | 317            | 96             | 165            | 95              | 70            | 93               | 14            | 100 |
| Achevé avec intervention chirurgicale        | 10                          | 1  | 9                          | 3            | 1              | 1              | 2              | 2               | 2             | 4                | 4                 | 15                | 1              | <1           | 1              | <1             | 0              | 0               | 0             | 0                | 0             | 0   |
| Pas achevé/Pas sûr                           | 40                          | 4  | 16                         | 5            | 5              | 4              | 8              | 7               | 2             | 4                | 1                 | 4                 | 24             | 4            | 11             | 3              | 9              | 5               | 4             | 5                | 0             | 0   |
| Manquant                                     | 1                           | <1 | 0                          | 0            | 0              | 0              | 0              | 0               | 0             | 0                | 0                 | 0                 | 1              | <1           | 0              | 0              | 0              | 0               | 1             | 1                | 0             | 0   |
| Au dernier suivi :                           | <i>n = 951</i>              | %  | <i>n = 356</i>             | %            | <i>n = 141</i> | %              | <i>n = 134</i> | %               | <i>n = 50</i> | %                | <i>n = 31</i>     | %                 | <i>n = 593</i> | %            | <i>n = 330</i> | %              | <i>n = 174</i> | %               | <i>n = 75</i> | %                | <i>n = 14</i> | %   |
| Achevé sans intervention chirurgicale        | 922                         | 97 | 334                        | 94           | 134            | 95             | 131            | 98              | 46            | 92               | 23                | 74                | 586            | 99           | 327            | 99             | 172            | 99              | 74            | 99               | 13            | 93  |
| Achevé avec intervention chirurgicale        | 17                          | 2  | 14                         | 4            | 2              | 1              | 2              | 2               | 3             | 6                | 7                 | 23                | 3              | 1            | 2              | 1              | 0              | 0               | 0             | 0                | 1             | 7   |
| Pas achevé/Pas sûr                           | 10                          | 1  | 8                          | 2            | 5              | 4              | 1              | 1               | 1             | 2                | 1                 | 3                 | 2              | <1           | 1              | <1             | 1              | 1               | 0             | 0                | 0             | 0   |
| Manquant                                     | 2                           | <1 | 0                          | 0            | 0              | 0              | 0              | 0               | 0             | 0                | 0                 | 0                 | 2              | <1           | 0              | 0              | 1              | 1               | 1             | 1                | 0             | 0   |

1. Comprend 2 personnes dont le régime d'avortement médicamenteux est inconnu

2. 32 personnes n'ayant pas complété un premier suivi sont exclues du dénominateur

**Figure 2. Évaluation de la non-infériorité de l'efficacité de l'avortement médicamenteux autogéré mesurée dans l'étude SAFE chez 780 participantes ayant une grossesse de moins de 9 semaines, par rapport à l'efficacité de l'avortement médicamenteux clinique mesurée dans les essais cliniques historiques chez 1 463 participantes ayant une grossesse de moins de 9 semaines gestation**

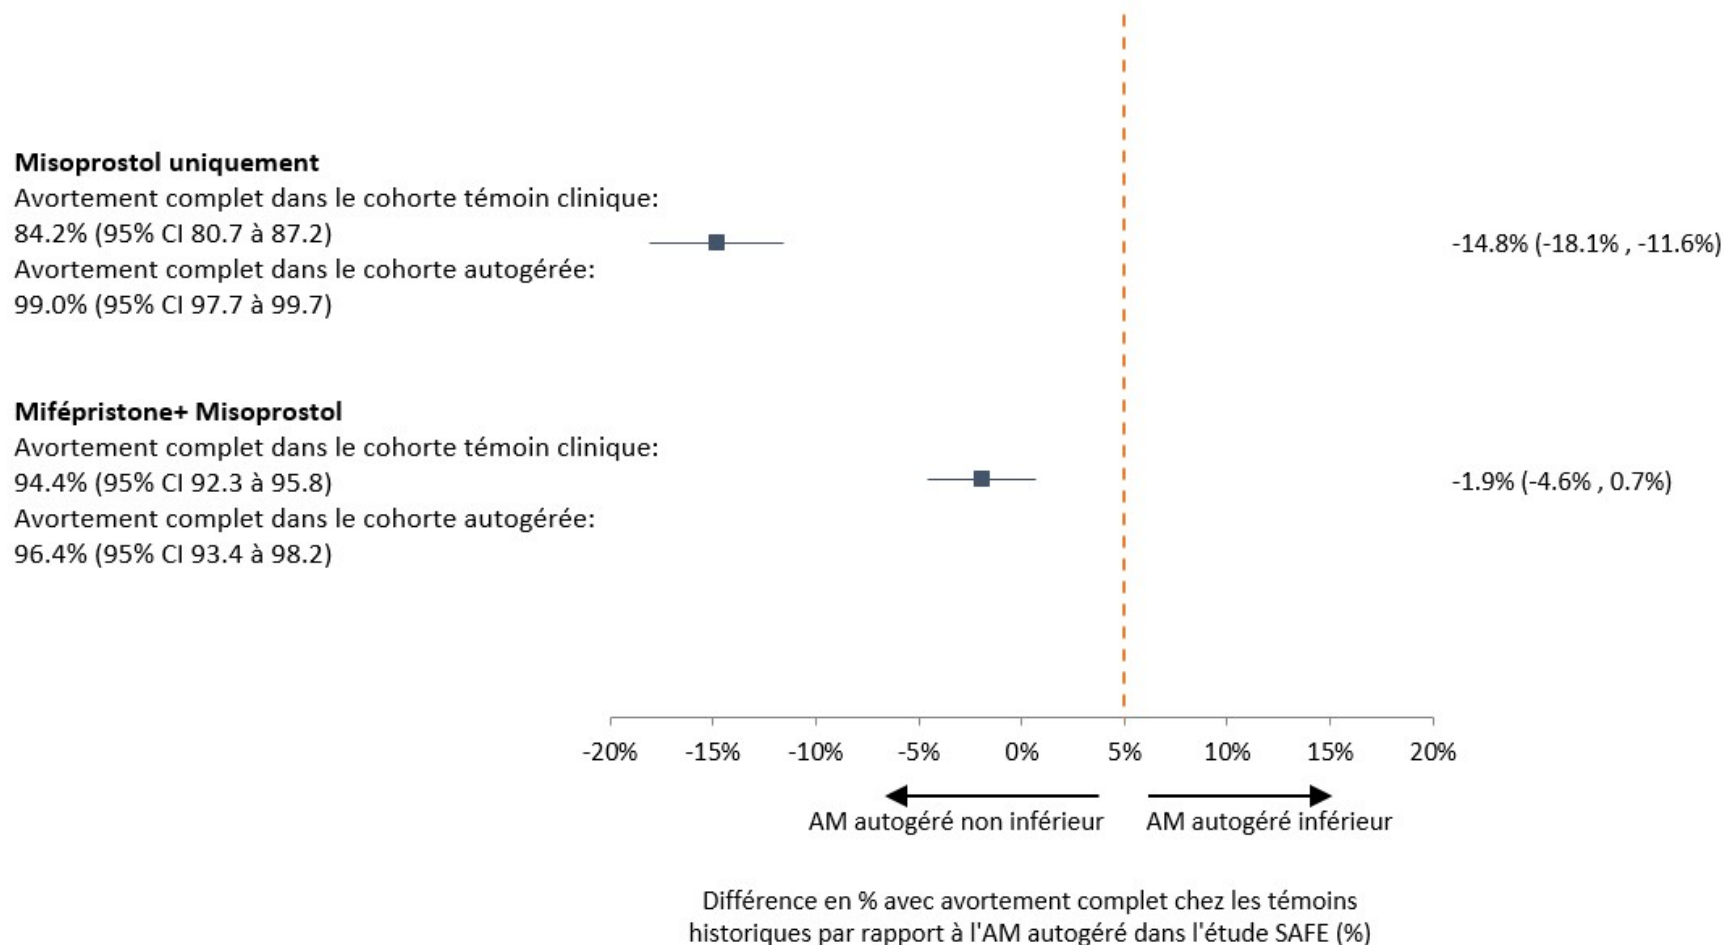

Supplement: mmc2.pdf [file mmc2.pdf]
