# Supplementary material
Source: PubMed Central journal article supplement (PMC9359894)

# THE LANCET

## Global Health

### Supplementary appendix 4

This translation in Spanish was submitted by the authors and we reproduce it as supplied. It has not been peer reviewed. *The Lancet's* editorial processes have only been applied to the original in English, which should serve as reference for this manuscript.

Los autores nos proporcionaron esta traducción al español y la reproducimos tal como nos fue entregada. No la hemos revisado. Los procesos editoriales de *The Lancet* se han aplicado únicamente al original en inglés, que debe servir de referencia para este manuscrito.

Supplement to: Moseson H, Jayaweera R, Egwuatu I, et al. Effectiveness of self-managed medication abortion with accompaniment support in Argentina and Nigeria (SAFE): a prospective, observational cohort study and non-inferiority analysis with historical controls. *Lancet Glob Health* 2021; published online Nov 18. [http://dx.doi.org/10.1016/S2214-109X\(21\)00461-7](http://dx.doi.org/10.1016/S2214-109X(21)00461-7).

**Título:** Eficacia del aborto autogestionado con medicamentos con apoyo de acompañamiento en Argentina y Nigeria: un estudio prospectivo y de observación de cohorte y análisis de ausencia de inferioridad con controles históricos

**Autores:** Heidi Moseson, PhD<sup>1\*</sup>, Ruvani Jayaweera, PhD<sup>1</sup>, Ijeoma Egwuatu, BS<sup>2</sup>, Belen Grosso, BA<sup>3</sup>, Ika Ayu Kristianingrum, MA<sup>4</sup>, Sybil Nmezi, MA<sup>2</sup>, Ruth Zurbriggen, MEd<sup>3</sup>, Relebohile Motana, PDM<sup>5</sup>, Chiara Bercu, MPA<sup>1</sup>, Sofia Carbone, MPH<sup>1</sup>, Caitlin Gerds, PhD<sup>1</sup>.

**Afiliaciones del autor:**

<sup>1</sup> Ibis Reproductive Health, 1736 Franklin Street, Suite 600, Oakland, California, EE. UU. 94612

<sup>2</sup> Generation Initiative for Women and Youth, Estado de Lagos, Nigeria

<sup>3</sup> La Revuelta Colectiva Feminista, Neuquén, Argentina

<sup>4</sup> Samsara, Yogyakarta, Indonesia

<sup>5</sup> Ibis Reproductive Health, Postnet Suite # 197, Private Bag X2600, Houghton 2041, Johannesburgo, Sudáfrica

**\*Autor para correspondencia**

Heidi Moseson, PhD MPH  
Ibis Reproductive Health  
1736 Franklin Street, Suite 600  
Oakland, CA 94612  
Teléfono: +1.510.822.2696  
Correo electrónico: [hmoseson@ibisreproductivehealth.org](mailto:hmoseson@ibisreproductivehealth.org)

**Palabras clave:** aborto, acompañamiento, mifepristona, misoprostol, aborto autogestionado

**Financiamiento** Fundación David and Lucile Packard.

Derechos de autor © 2017 El/Las autor(as). Publicado por Elsevier Ltd. Este es un artículo de Acceso Abierto bajo la licencia CC BY 4.0.

## Resumen

**Antecedentes** Los ensayos clínicos han establecido la alta eficacia y seguridad del aborto con medicamentos en entornos clínicos. Sin embargo, las barreras para la atención del aborto clínico han desplazado a la mayoría de los abortos con medicamentos a entornos ambulatorios, en especial en el contexto de la pandemia de COVID-19. Dado este desplazamiento, nuestro objetivo fue estimar la eficacia del aborto con medicamentos autogestionado (aborto con medicamentos sin apoyo hospitalario), y compararla con la eficacia del aborto con medicamentos gestionado por un médico.

**Métodos** Para este estudio prospectivo y de observación de cohorte, reclutamos a personas que llamaron a dos grupos de acompañamiento de aborto seguro en Argentina y Nigeria para solicitar información acerca del aborto con medicamentos autogestionado. Antes de utilizar uno de los dos regímenes de medicamentos (solo misoprostol o en combinación con mifepristona), las participantes completaron una encuesta inicial, y luego dos encuestas de seguimiento por teléfono una y tres semanas después de tomar las píldoras. El criterio principal de valoración fue la proporción de participantes que informaron un aborto completado sin intervención quirúrgica. Las restricciones éticas y legales imposibilitaron la inclusión de un grupo de control clínico concurrente; por lo tanto, un análisis de ausencia de inferioridad comparó la compleción del aborto entre las participantes en nuestra cohorte de aborto con medicamentos autogestionado con la compleción del aborto informada en ensayos clínicos históricos en los que se utilizaron los mismos regímenes de medicamentos, restringido a participantes con embarazos de menos de 9 semanas de gestación. Este estudio fue registrado en ISCRTN, en ISRCTN95769543.

**Hallazgos** Entre el 31 de julio de 2019 y el 27 de abril de 2020, inscribimos a 1051 participantes. Analizamos los resultados del aborto de 961 participantes, y de 47 participantes adicionales contactadas luego del período del estudio. La mayoría de los embarazos tenían menos de 12 semanas de duración. Las participantes en seguimiento autogestionaron sus abortos utilizando solo misoprostol (593 participantes) o el régimen combinado de misoprostol más mifepristona (356 participantes). En el último seguimiento, 586 (99 %) usuarias de solo misoprostol y 334 (94 %) del régimen combinado habían tenido un aborto completado sin intervención quirúrgica. En aquellas participantes con embarazos de menos de 9 semanas de gestación, ambos regímenes tuvieron ausencia de inferioridad en comparación con la eficacia del aborto con medicamentos en entornos clínicos.

**Interpretación** Los hallazgos de este estudio prospectivo de cohorte muestran que el aborto con medicamentos autogestionado con apoyo de un grupo de acompañamiento es altamente eficaz y, para embarazos de menos de nueve semanas de gestación, tiene ausencia de inferioridad en comparación con la eficacia del aborto con medicamentos gestionado por un médico y administrado en un entorno clínico. Estos hallazgos respaldan el uso de modelos de autogestión remota para la atención del aborto temprano, incluso de telemedicina, una opción que varios países están considerando debido a la pandemia de COVID-19.

## 65 **Investigación en contexto**

### 66 **Evidencia antes de este estudio**

67 Para comprender lo que se sabe acerca de la eficacia y la seguridad del aborto con medicamentos  
68 autogestionado fuera de un entorno clínico, revisamos el alcance sistemático de la literatura sobre la  
69 eficacia del aborto autogestionado en ocho bases de datos biomédicas y de salud pública en español y en  
70 inglés, sin límites de fecha o duración del embarazo. Esta revisión fue previamente publicada, e identificó  
71 ocho estudios que informaron una alta eficacia del aborto con medicamentos autogestionado. Desde la  
72 publicación, se han publicado varios estudios adicionales sobre la eficacia del aborto autogestionado. La  
73 mayoría de los estudios son análisis retrospectivos e informan altos niveles de compleción del aborto  
74 luego de un aborto con medicamentos autogestionado, que varían, según la edad gestacional, de 48,3 % a  
75 99,5 %, En la revisión, identificamos muy pocos estudios *prospectivos* del uso el aborto con  
76 medicamentos autogestionado, y ningún estudio que haya evaluado formalmente la ausencia de  
77 inferioridad del aborto con medicamentos autogestionado en comparación con el aborto con  
78 medicamentos clínico, con respecto a la compleción del aborto. Además, pocos estudios informan las  
79 razones por las que se buscó atención médica luego de un aborto autogestionado.

### 80 **Valor agregado de este estudio**

81 Los resultados de este estudio prospectivo multipaís establecen que el aborto con medicamentos  
82 autogestionado con mifepristona y misoprostol, al igual que con solo misoprostol, es altamente eficaz y  
83 seguro; y, para aquellas personas con embarazos de menos de 9 semanas de gestación, tiene ausencia de  
84 inferioridad en comparación con la eficacia del aborto con medicamentos en entornos clínicos. Las  
85 personas que autogestionaron sus abortos con apoyo de acompañamiento pudieron acceder a la atención  
86 en clínicas y hospitales, y lo hicieron principalmente para confirmar la compleción del aborto, no por  
87 inquietudes de seguridad.

88

89     **Consecuencias de toda la evidencia disponible**

90     Los datos de nuestro estudio demuestran que el aborto autogestionado con uso de solo misoprostol o en  
91     combinación con mifepristona es altamente eficaz. Dados estos resultados, para garantizar el acceso a un  
92     servicio médico seguro, eficaz y de rutina, los Ministerios de Salud, los organismos profesionales, y los  
93     propios médicos deberían eliminar las restricciones y las barreras que existen para los enfoques de  
94     autogestión del aborto con medicamentos y facilitar el acceso a información precisa sobre el aborto con  
95     medicamentos en un amplio rango de modelos de prestación de servicios, incluso el uso por cuenta  
96     propia. Los resultados de este estudio también sugieren que el aborto autogestionado con apoyo de  
97     acompañamiento puede ser una estrategia fundamental para expandir el acceso a una atención segura y  
98     eficaz del aborto, independientemente del contexto legal.

99

100

## INTRODUCCIÓN

Los regímenes de medicamentos de mifepristona en combinación con misoprostol o de solo misoprostol que recomienda la Organización Mundial de la Salud (OMS)[1] son métodos seguros y eficaces establecidos para interrumpir un embarazo.[2-4] Los ensayos clínicos han demostrado niveles altos de eficacia y seguridad para ambos regímenes de aborto con medicamentos en los primeros 63 días de embarazo [5, 6]y, más recientemente, hasta los 84 días de embarazo.[7] La información de estos ensayos ha sido recopilada en contextos de altos y de bajos ingresos[8] y en abortos proporcionados por múltiples planteles de proveedores de atención médica.[9, 10]

El aborto con medicamentos es un método de bajo costo, seguro, eficaz, y relativamente simple para interrumpir un embarazo. Sin embargo, los contextos legales restrictivos, la falta de proveedores capacitados o predispuestos, el costo de los servicios clínicos, las experiencias de maltrato en establecimientos de salud, y otras inquietudes logísticas y sociales son barreras persistentes para los servicios de aborto en instituciones hospitalarias.[11] En consecuencia, la mayoría de los abortos con uso de medicamentos en todo el mundo tienen lugar fuera del entorno clínico.[12] El uso de medicamentos para interrumpir un embarazo por cuenta propia, sin supervisión clínica, se denomina aborto autogestionado.[11] Los ejemplos de aborto con medicamentos autogestionado van desde la obtención de las píldoras en línea o en una farmacia local y el uso de los medicamentos en el hogar sin apoyo clínico hasta el aborto autogestionado con el apoyo de grupos de acompañamiento de aborto seguro, en el que consejeras capacitadas en aborto (la mayoría de ellas sin capacitación clínica) proporcionan asesoramiento con base en evidencias y apoyo centrado en la persona (por teléfono o en persona) a alguien que está autogestionando un aborto. El modelo de aborto autogestionado con acompañamiento surgió como un área de acción autónoma de salud y de autodeterminación entre los movimientos feministas, en respuesta al fracaso del estado para proporcionar atención segura para el aborto. Este movimiento se caracteriza por tener estrategias impulsadas por las activistas y con base en la comunidad, para facilitar el uso de medicamentos con amplia disponibilidad fuera del entorno clínico.[13] Para

algunas personas, el aborto con medicamentos autogestionado es un modelo de atención preferido debido a su privacidad y comodidad; para otras, es la única opción cuando la atención clínica es inaccesible.[11]

De manera consistente con los ensayos clínicos que establecieron la seguridad y la eficacia del aborto con medicamentos, hay un corpus de evidencia que demuestra la eficacia y la seguridad del aborto con medicamentos autogestionado.[11, 14, 15] Sin embargo, en muchos casos, algunas limitaciones del estudio, tales como una dependencia en la revisión de registros retrospectivos, el pequeño tamaño de la muestra, y la pérdida de contacto en el seguimiento., han socavado el uso exhaustivo de los resultados.[16] Las directrices de la OMS expresan la necesidad de que exista evidencia acerca de la seguridad, la eficacia y la aceptabilidad del aborto con medicamentos fuera de los establecimientos hospitalarios, en especial, para los embarazos que superan las 10 semanas de gestación, y la necesidad de comprender el rol que tiene la persona en la autoevaluación de la elegibilidad y la compleción del aborto, en especial, con los regímenes de solo misoprostol, ya que la información clínica ha sugerido que son menos eficaces.[1] Además, han aumentado los pedidos de que se recopile de forma rigurosa información acerca de las experiencias que tienen las personas con el aborto autogestionado, para determinar si las personas pueden gestionar de manera segura y eficaz todo el proceso de aborto con medicamentos.[12, 17]

Los grupos de acompañamiento del aborto proporcionan una plataforma prometedora para la investigación rigurosa y prospectiva sobre el aborto autogestionado con medicamentos.[18] Con el objetivo de abordar las brechas en la investigación del aborto con medicamentos autogestionado, llevamos a cabo un estudio prospectivo de observación de cohorte para estimar la eficacia de los regímenes, tanto de mifepristona con misoprostol (el régimen combinado) y de solo misoprostol, cuando se los utiliza para interrumpir un embarazo sin supervisión clínica pero con el apoyo de los grupos de acompañamiento, y para comparar, a nivel formal, esta eficacia con la eficacia del aborto con medicamentos gestionado por un médico que demuestran los ensayos clínicos históricos mediante una prueba de ausencia de inferioridad. Debido a las restricciones legales para el aborto en ambos sitios, no

fue factible ni ético reclutar un brazo de control clínico concurrente. Planteamos la hipótesis de que la eficacia del aborto autogestionado con medicamentos con ambos regímenes sería alta (>90 %), y que la eficacia del aborto autogestionado con medicamentos tendría ausencia de inferioridad con respecto a la eficacia del aborto con medicamentos medida en contextos clínicos dentro de un margen de ausencia de inferioridad del 5 %.[16]

## **MÉTODOS**

### *Diseño y participantes del estudio*

El Estudio de factibilidad y eficacia del acompañamiento (SAFE), un estudio prospectivo y de observación de cohorte, inscribió a las personas que se comunicaron con un grupo de acompañamiento de aborto para solicitar información y apoyo para autogestionar un aborto, y se les realizó un seguimiento de hasta cuatro semanas para evaluar los resultados de los abortos y las experiencias. Se publicaron previamente los resultados de un estudio piloto y los detalles completos del protocolo del estudio.[16, 18]

Reclutamos a las personas que llamaron a dos grupos de acompañamiento: uno en Argentina (con sede en Neuquén y que presta servicios principalmente a la provincia de Neuquén) y uno en Nigeria (con base en el estado de Lagos, que presta servicios a todo el país). Al momento de la recopilación de la información, el aborto era ilegal en ambos sitios salvo para salvar la vida de la persona embarazada o,[19] adicionalmente, en el caso de violación en Argentina.[20] Se evaluó la elegibilidad de cada persona que se comunicó con cualquiera de los dos grupos durante el período del estudio para solicitar información sobre aborto inducido para su propio embarazo. Fue elegible cualquier persona mayor de 13 años de edad, que estuviera comenzando un proceso nuevo de aborto con medicamentos, sin ninguna contraindicación para el aborto con medicamentos[1], y dentro de un rango de edad gestacional aceptado por el grupo de acompañamiento (hasta 24 semanas en Argentina y hasta 15 semanas en Nigeria).[16] Excluimos a las personas que, al momento de la llamada, estaban experimentando síntomas (sangrado, cólicos) debido a

un intento de aborto previo; tenían síntomas que sugerían un embarazo ectópico; o que no querían o no podían ser contactadas por el personal del estudio.

Todas las participantes proporcionaron el consentimiento informado en forma oral. El Allendale Investigational Review Board (Comité de Revisión de Investigación Allendale) y revisó y aprobó este estudio multipaís, y el Comité de Revisión de la Fundación Huésped aprobó el protocolo específico para Argentina. Un Comité de Supervisión y Monitoreo de Datos independiente revisó los protocolos y documentos del estudio y un análisis provisorio planificado de cualquier evento de seguridad.

### *Procedimientos*

Al inicio, todas las participantes recibieron instrucciones detalladas de las consejeras de los grupos de acompañamiento acerca del protocolo apropiado recomendado por la OMS para el aborto con medicamentos (Tabla 1), con base en la duración del embarazo (evaluada mediante una ecografía adquirida de manera independiente o con base en la fecha del último período menstrual),[1, 16] y en los medicamentos a los que la persona que llamaba podría acceder.

Luego de la consejería informativa inicial, las participantes respondieron un cuestionario inicial que les administró su consejera de acompañamiento. Para toda la recopilación de información posterior, un coordinador del estudio capacitado se comunicó con cada participante en dos momentos (una semana y tres semanas después de tomar la primera dosis de medicamentos) para evaluar la utilización y el acceso al aborto con medicamentos, documentar los efectos secundarios, las dosis adicionales tomadas, la compleción del aborto, las complicaciones potenciales y el comportamiento de búsqueda de atención médica. Las participantes recibieron una compensación de 10-25 dólares por su participación en el estudio. Los procedimientos del estudio fueron consistentes en ambos sitios, salvo por la confirmación del embarazo: las consejeras en Argentina le ofrecieron a un subgrupo de participantes seleccionadas de manera aleatoria una prueba de embarazo en orina para confirmar el embarazo (no fue ofrecida en Nigeria).

## 200 *Criterios de valoración*

201 El criterio principal de valoración fue la eficacia del aborto autogestionado con medicamentos  
202 con apoyo de acompañamiento, calculado como el porcentaje de personas que respondieron y  
203 autoinformaron un aborto completado sin intervención quirúrgica, en general y por régimen de  
204 medicamentos. La investigación estableció que las personas pueden autoevaluar de manera precisa la  
205 compleción del aborto.[21] El criterio secundario de valoración fue una evaluación de la ausencia de  
206 inferioridad de la eficacia del aborto con medicamentos autogestionado, en comparación con la eficacia  
207 del aborto con medicamentos gestionado por un médico y medida en ensayos clínicos históricos.

208 Otros criterios de valoración que se midieron incluyeron la fuente de obtención y uso de la  
209 medicación, los factores que influyeron en la autoevaluación de la compleción del aborto, y el  
210 comportamiento al buscar atención médica y el tratamiento recibido. Para medir los criterios de  
211 valoración de seguridad y eventos adversos, les pedimos a las participantes que autoinformaran si habían  
212 tenido alguno de los nueve criterios de valoración bien diferenciados (sangrado intenso, dolor extremo,  
213 secreción vaginal con olor fétido, fiebre alta, uso de antibióticos, realización de aspiración manual o  
214 dilatación y curetaje, transfusión de sangre, recepción de fluidos intravenosos, o internación en un  
215 establecimiento de salud). También se les pidió a las participantes que autoinformen cualquier otro  
216 tratamiento. Además, recopilamos información acerca de la edad, educación, confirmación del embarazo  
217 y edad gestacional de las participantes.

218

## 219 *Análisis estadístico*

220 Nuestro objetivo era estimar la proporción de participantes que tuvieron un aborto completado sin  
221 intervención quirúrgica luego de un aborto autogestionado con mifepristona y misoprostol y con solo  
222 misoprostol; y evaluar si la eficacia del aborto autogestionado con medicamentos tiene ausencia de  
223 inferioridad con respecto a la eficacia del aborto con medicamentos gestionado por un médico, según se  
224 informa en los ensayos clínicos históricos con un margen del 5 %.[22-25]

Para nuestro análisis primario, especificamos previamente la exclusión de participantes con resultados desconocidos del aborto, de manera consistente con los ensayos clínicos de comparación.[16, 22] La proporción de participantes del estudio que habían tenido un aborto completado se evaluó mediante la respuesta a dos preguntas: "¿Sientes que tu proceso de aborto se completó?", y también si habían informado haber recibido un procedimiento de aspiración manual o dilatación y curetaje. A las participantes que informaron que su aborto se había completado y no informaron haber recibido una intervención quirúrgica, se las clasificó como "completado sin intervención quirúrgica"; las participantes que informaron que su aborto se había completado e informaron haber realizado un procedimiento de aspiración manual o dilatación y curetaje, fueron clasificadas como "completado con intervención quirúrgica". A las participantes que informaron que su aborto no se había completado o informaron no estar seguras de que se hubiera completado, se las clasificó como "No completado/no está segura". Calculamos todas las proporciones en general, por régimen de medicamentos y duración del embarazo (<7 semanas, entre 7 y 9 semanas, entre 10 y 12 semanas y  $\geq 13$  semanas). Debido al registro diferente de mifepristona en cada país y a la extrema precaución de los aliados para la implementación, no informamos la cantidad de usuarias de los regímenes por país. Las participantes de ambos países están representadas en cada grupo de régimen, de modo que agrupamos los países para calcular los criterios principales de valoración.

La determinación de la eficacia y seguridad del aborto con medicamentos autogestionado en comparación con el aborto con medicamentos gestionado por un médico en entornos clínicos es una brecha fundamental en la evidencia. Debido a las restricciones legales, no fue factible ni ético reclutar un brazo de control clínico concurrente como parte del estudio SAFE. Por lo tanto, conforme a los precedentes establecidos[26], identificamos ensayos controlados aleatorizados publicados previamente sobre la eficacia del aborto con medicamentos en entornos clínicos para que sirvieran como controles históricos de un análisis de ausencia de inferioridad: tres ensayos estudiaron el mismo régimen combinado[23-25], y un ensayo estudió el mismo régimen de solo misoprostol[22]. Estos fueron los

250 únicos ensayos identificados en los que el régimen utilizado fue idéntico a los regímenes recomendados  
251 por los grupos de acompañamiento, y todos son ampliamente citados en todas las directrices pertinentes  
252 sobre aborto seguro.[1] Los controles históricos no tienen la intención de ser un sustituto de la  
253 aleatorización; sin embargo, para evaluar la comparabilidad, evaluamos las diferencias en la edad y  
254 duración del embarazo de las participantes del estudio SAFE en comparación con los controles históricos  
255 mediante pruebas de t y pruebas de proporción. Extrajimos información sobre la compleción del aborto de  
256 los resultados publicados de los controles históricos.

257 Realizamos dos pruebas de ausencia de inferioridad: una entre las usuarias del régimen de solo  
258 misoprostol y otra entre las usuarias del régimen combinado. Restringimos la muestra del estudio SAFE a  
259 las participantes con <9 semanas de gestación para que coincida con los criterios de elegibilidad de los  
260 estudios de comparación. Los detalles completos del análisis de ausencia de inferioridad fueron  
261 publicados previamente [16] y están detallados en el Apéndice 6.

262 La información se analizó con el software de estadísticas STATA versión 15.1. El tamaño de  
263 muestra mínimo objetivo era 213 para el régimen combinado y 419 para el régimen de solo misoprostol  
264 para una prueba unilateral, para evaluar si el aborto con medicamentos autogestionado con apoyo de  
265 acompañamiento es como máximo 5 % menos eficaz que el entorno clínico para cada régimen, con un  
266 80 % de potencia, un  $\alpha$  de 5 % y ninguna correlación entre consejeras (con base en los resultados del  
267 estudio piloto).[18]Este estudio está registrado en ISRCTN, en ISRCTN95769543.

#### 268 *Rol de la fuente de financiamiento*

269 Los patrocinadores del estudio no tuvieron ningún rol en el diseño del estudio, la recopilación de la  
270 información, el análisis, la interpretación ni la redacción del informe.

## RESULTADOS

Entre el 31 de julio de 2019 y el 27 de abril de 2020, las reclutadoras del estudio evaluaron la elegibilidad de 1237 personas que llamaron (Figura 1). Ciento dieciocho (10 %) no fueron elegibles debido a que necesitan apoyo no relacionado con el aborto, ya habían iniciado un proceso de aborto con medicamentos, o estaban experimentando síntomas de un aborto o aborto espontáneo en curso. Entre las 1119 personas elegibles, 1051 (94 %) dieron su consentimiento para participar, respondieron las preguntas iniciales y fueron inscritas en el estudio (n=401 de Argentina, n=650 de Nigeria). Novecientos sesenta y una participantes (91 %) de las 1051 que se inscribieron completaron al menos un seguimiento e informaron si habían obtenido y tomado los medicamentos o no. Entre aquellas que tuvieron al menos un contacto de seguimiento, 929 (97 %) de 961 completaron la encuesta de una semana y 846 (88 %) completaron la encuesta de tres semanas. Noventa (9 %) de 1051 participantes no completaron un seguimiento del estudio después del inicio; 47 (4 %) fueron contactadas posteriormente para confirmar los criterios principales de valoración y 43 (4 %) tuvieron resultados desconocidos.

La edad de las participantes fue de entre 14 a 50 años, y la edad de la mayoría de entre 20 y 29 años (Tabla 2). Las participantes de Argentina eran residentes de tres provincias (Neuquén, Río Negro y Salta). Las participantes de Nigeria eran residentes de 28 estados (principalmente Lagos, Imo y Abia). La mayoría de las participantes confirmaron sus embarazos mediante una prueba de embarazo en el hogar. Dos (2 %) de 102 pruebas de embarazo fueron negativas en una muestra aleatoria de participantes que hicieron la prueba de embarazo en el hogar al inicio. Las participantes informaron embarazos de entre 4 y 22 semanas de gestación al inicio. La mayoría de los embarazos tenían menos de 12 semanas de duración.

Al momento del seguimiento a una semana, 922 participantes habían obtenido los medicamentos y 919 habían tomado los medicamentos, incluso aquellas que recibieron un medicamento desconocido (Apéndice 6). Tres participantes informaron haber conseguido las píldoras pero no haberlas tomado porque habían decidido continuar con el embarazo (tres [ $<1$  %] participantes). De las participantes que

299 utilizaron el régimen combinado, todas las participantes informaron haber tomado primero la  
300 mifepristona, y la mayoría tomó luego cuatro píldoras de misoprostol (349/356, 98,0 %), por vía  
301 sublingual (274/356, 77,0 %; Apéndice 6). Tres participantes (1 %) informaron haber tomado una  
302 segunda dosis de una sola píldora de mifepristona antes de continuar con el misoprostol; estas tres  
303 participantes estaban en etapas más avanzadas de embarazo (16, 17 y 19 semanas). En el caso de aquellas  
304 que utilizaron el régimen de solo misoprostol, la mayoría de las participantes tomó cuatro píldoras para  
305 las tres dosis, casi todas por vía sublingual. En cada grupo de régimen había participantes de ambos  
306 países; sin embargo, la mayoría de las usuarias del régimen combinado vivían en Argentina, mientras que  
307 la mayoría de las usuarias de solo misoprostol vivían en Nigeria.

308       Aproximadamente 1 semana después de tomar las píldoras, 868 (94 %) de 919 participantes que  
309 informaron haber tomado las píldoras y completado el seguimiento a una semana, informaron un aborto  
310 completado sin intervención quirúrgica (300 [92 %] de 325 usuarias de régimen combinado, y 566 [96 %]  
311 usuarias de solo misoprostol), y diez (1 %) participantes adicionales informaron un aborto completado  
312 con intervención quirúrgica (Tabla 3). Al momento del último seguimiento del estudio, 922 (97 %) de 951  
313 participantes informaron un aborto completado sin intervención quirúrgica y 17 (2 %) informaron un  
314 aborto completado con intervención quirúrgica. La compleción del aborto fue alta en ambos regímenes de  
315 medicamentos. Entre las usuarias del régimen combinado, la ocurrencia de una intervención quirúrgica  
316 para completar el aborto aumentó cuando aumentó la duración del embarazo.

317       Las coordinadoras del estudio se comunicaron con 47 (52 %) de 90 participantes que fueron  
318 perdidas para el seguimiento después del período del estudio para registrar el criterio principal de  
319 valoración; 39 informaron un aborto completado sin intervención quirúrgica. Bajo el supuesto  
320 conservador de que las 43 (48 %) participantes restantes que no pudieron ser contactadas después del  
321 inicio no tuvieron un aborto completado, la compleción del aborto en general en el último seguimiento  
322 estaría en 961 (91,0 %) participantes de 1051 sin intervención quirúrgica. Luego de incluir las

323 intervenciones quirúrgicas y los abortos espontáneos entre las participantes perdidas para el seguimiento,  
324 987 (94 %) participantes ya no estaban embarazadas al final del seguimiento.

325 Entre las participantes que informaron que su aborto se había completado, casi todas mencionaron  
326 más de un factor que había afectado su evaluación de la compleción del aborto, incluso 367 (39 %) que  
327 informaron alguna forma de confirmación clínica de la compleción (Apéndice 6).

328 Durante el seguimiento del estudio, 192 (20 %) de 951 participantes buscaron atención médica en  
329 un hospital o clínica (120 [34 %] usuarias del régimen combinado, 71 [12 %] usuarias de solo misoprostol  
330 y una [8 %] participante con un régimen desconocido de aborto con medicamentos (Apéndice 6). Entre  
331 las participantes que buscaron atención, la mayoría lo hizo para confirmar la compleción del aborto (157  
332 [82 %] de 192 participantes). Veintiún [11 %] de 192 participantes buscaron atención debido a  
333 inquietudes relacionadas con dolor, sangrado, secreción o fiebre. Los tratamientos que las participantes  
334 informaron con haber recibido más frecuencia fueron los siguientes: ecografía (80 [8 %] de 951  
335 participantes), analgésicos (25 [3 %] participantes), fluidos intravenosos (19 [2 %] participantes) y  
336 antibióticos (16 [2 %] participantes). Diecisiete (2 %) participantes informaron haber recibido una  
337 aspiración manual o dilatación uterina y curetaje y 12 (1 %) informaron haber permanecido una noche en  
338 un establecimiento médico (todas ellas habían recibido una aspiración manual o dilatación uterina y  
339 curetaje), y 6 (1 %) participantes informaron haber recibido una transfusión de sangre. Las participantes  
340 de Argentina tuvieron más probabilidades de obtener una aspiración manual que las participantes de  
341 Nigeria (diferencia de riesgo=9,2; IC del 95 %: 3,4-15,0; p=0,0013). Setecientos ochenta y dos (82 %) de  
342 951 participantes informaron no haber tenido ningún signo potencial de alarma de complicaciones, 84  
343 (9 %) informaron sangrado que empapó más de dos toallas femeninas por hora y que duró más de dos  
344 horas, 80 (8 %) informó secreción vaginal con olor fétido o coloreada, 50 (5 %) informaron dolor que  
345 interfirió con las actividades normales y 16 (2 %) informaron una fiebre superior a 38 °C durante más de  
346 24 horas.

Para el análisis de ausencia de inferioridad, 1463 participantes evaluables en los cuatro estudios de control históricos de comparación tenían embarazos de menos de 9 semanas de gestación, residían en uno de 11 países (Armenia, China, Cuba, Georgia, India, Mongolia, Rumanía, Eslovenia, Suecia, Tailandia y Vietnam), y fueron aleatorizadas al mismo régimen de medicamentos estudiado en el estudio SAFE (951 al régimen combinado y 512 al de solo misoprostol), y fueron comparadas con 779 participantes de SAFE con embarazos de menos de 9 semanas de gestación (275 con régimen combinado, 504 con solo misoprostol). En lo que respecta al régimen de medicamentos, las participantes en el estudio SAFE y en los estudios de control históricos eran similares, aunque la edad de las participantes en SAFE era levemente mayor (1 a 4 años en promedio), y sus embarazos eran levemente menos avanzados (aproximadamente 1 semana en promedio, Apéndice 6),

Entre las usuarias del régimen combinado, la compleción del aborto entre las participantes de SAFE con embarazos de menos de 9 semanas de gestación fue 96 % (265 de 275 participantes), en comparación con un nivel de compleción agrupado del 94 % (898 de 951 participantes) entre los tres grupos de control históricos (diferencia de riesgo= -1,9 %, IC del 95 %: -4,6 a 0,7%; Figura 2 y Apéndice 6)[23-25]. Entre las usuarias de solo misoprostol, la compleción del aborto entre las participantes de SAFE con embarazos de menos de 9 semanas de gestación fue 99,0 % (499 de 504 participantes), en comparación con un nivel de compleción del 84 % (431 de 512 participantes) informado en el grupo de control histórico comparable (diferencia de riesgo= -14,8 %, CI del 95 %: -18,1 a -11,6 %; Figura 2 y Apéndice 6).[22] Dado que los límites superiores de los intervalos de confianza del 95 % para la diferencia de riesgo entre el aborto autogestionado y el aborto gestionado de manera clínica para ambos regímenes son inferiores al margen de ausencia de inferioridad del 5 %, rechazamos la hipótesis nula de inferioridad.

## **DISCUSIÓN**

Nuestros hallazgos muestran que el aborto con medicamentos autogestionado con apoyo de un grupo de acompañamiento es altamente eficaz y, para embarazos de menos de nueve semanas de duración, tiene

ausencia de inferioridad en comparación con la eficacia del aborto con medicamentos administrado en un entorno clínico. Durante aproximadamente cuatro semanas de seguimiento, la mayoría de las participantes obtuvieron los medicamentos, los tomaron según los protocolos de la OMS y completaron sus abortos; una pequeña cantidad de las participantes buscaron atención médica en una clínica u hospital, principalmente para confirmar la compleción del aborto.

Nuestros resultados contribuyen a una base de evidencia creciente acerca de la eficacia y seguridad del aborto con medicamentos autogestionado, con y sin apoyo de acompañamiento.[11, 14-16] Tomados de manera conjunta, estos hallazgos tienen muchas y amplias implicancias. Primero, los resultados del estudio SAFE se suman a un corpus de evidencia sólido que indica que el aborto con medicamentos es eficaz en un rango de modelos de prestación de servicios, en entornos tanto clínicos como no clínicos. La seguridad y la eficacia del aborto con medicamentos fueron bien establecidas en un rango de entornos con trabajadores de la salud, incluso en entornos clínicos tradicionales,[3, 22-25] en una videollamada con un médico clínico,[27] y en entornos autogestionados con apoyo de un farmacéutico[15]. Estos hallazgos demuestran que el aborto con medicamentos también es eficaz cuando se lo autogestiona en el hogar con información proporcionada por consejeras de aborto sin capacitación clínica.

Además, los hallazgos del estudio SAFE indican que el aborto con medicamentos autogestionado con apoyo de acompañamiento es seguro, y que las consejeras de aborto sin capacitación clínica pueden ayudar a las personas a comprender cuándo y cómo acceder a la atención si la necesitan o desean durante un aborto autogestionado. Las diferencias observadas en aspiración manual por país puede deberse a las diferencias en la accesibilidad a este servicio por país, al igual que a las diferencias en las relaciones que tienen los grupos de acompañamiento con proveedores de atención médica en los que confían. Si bien no podemos asegurar que todas las participantes que quizás deseaban recibir atención médica, la hayan buscado, nuestra información sugiere que las personas pudieron acceder a la atención cuando fue necesario. Desde una perspectiva de medición, estos hallazgos desafían la noción de que una visita a un

397 establecimiento de salud durante o después de un aborto autogestionado debe ser medida como una  
398 complicación del aborto; y desde una perspectiva de provisión de atención, debería alentar a los sistemas  
399 de salud a reconsiderar cómo apoyar mejor a las personas que lo autogestionan.

400       En particular, la eficacia de solo misoprostol en el estudio SAFE es mayor que la típicamente  
401 informada en los ensayos clínicos.[6] Sin embargo, los hallazgos de este estudio son consistentes con los  
402 niveles de eficacia del 92,6 al 96,4 % informados en estudios recientes de aborto autogestionado con solo  
403 misoprostol.[14, 15, 18] Se puede atribuir la eficacia más alta de solo misoprostol que se observa en los  
404 estudios sobre entornos autogestionados versus solo misoprostol en entornos clínicos a los siguientes  
405 factores: primero, los estudios del aborto con medicamentos autogestionado típicamente han evaluado la  
406 compleción del aborto en un período de 3 a 4 semanas, en comparación con el período mucho más corto  
407 de 1 a 2 semanas en los ensayos clínicos.[28] Además, en ensayos clínicos, las participantes cuyo abortos  
408 están en proceso, son incompletos, sin información o fallidos al momento de la evaluación del resultado,  
409 son típicamente recomendadas para intervención quirúrgica,(p. ej., [22]) mientras que las participantes en  
410 entornos autogestionados tienen más probabilidades de recibir consejería con un enfoque de gestión de la  
411 persona embarazada o consejería para recibir dosis adicionales de misoprostol (conforme a las directrices  
412 de la OMS)[1] antes de buscar atención médica adicional.[28] Por último, tanto en el estudio SAFE como  
413 en otros estudios en entornos no clínicos, las participantes tuvieron acceso bajo demanda a consejeras de  
414 aborto que estaban disponibles como recurso para preguntas acerca del rango de sangrado normal y de los  
415 efectos secundarios, y para derivar para la búsqueda de atención en el caso de posibles complicaciones. Se  
416 ha demostrado que este tipo de comunicación frecuente y de apoyo ayuda a las clientes que buscan un  
417 aborto a sentirse más preparadas para su experiencia de aborto,[29] y podría haber colaborado a una  
418 mejor comprensión y capacidad de permitir que el proceso de aborto con medicamentos siga su curso.  
419 Dada la alta eficacia de los regímenes de solo misoprostol informada en entornos de aborto  
420 autogestionado en comparación con entornos clínicos, se necesita más investigación para explorar cómo

los protocolos ajustados, al igual que una mejor consejería y apoyo a las clientes que buscan un aborto en entornos clínicos pueden maximizar la eficacia de los regímenes con solo misoprostol.

El hecho de llevar a cabo un estudio prospectivo entre personas que autogestionan un aborto en contextos restrictivos presenta algunos desafíos. Notoriamente, el diseño del estudio dependía del autoinforme de la edad gestacional y del resultado del aborto; por lo general los criterios de valoración se confirmaron mediante ecografías en los estudios clínicos. Sin embargo, la investigación informa que la confianza en el autoinforme de estas características de elegibilidad y resultados ha demostrado la exactitud del informe del último período menstrual en comparación con la evaluación por ecografía,[30] y la eficacia y la seguridad del aborto con medicamentos sin ecografía de evaluación.[31] De hecho, la directriz técnica de la OMS no exige la confirmación de la edad gestacional por ecografía para el aborto con medicamentos temprano.[1] Además, los estudios en un rango de entornos han demostrado la confiabilidad del autoinforme de compleción del aborto.[21] Por último, dadas las restricciones legales para el aborto en ambos sitios, no fue factible reclutar un control clínico concurrente. Por lo tanto, nos apoyamos en la apropiación de ensayos clínicos históricos que estudiaron los mismos regímenes de medicamentos dentro del mismo rango de edad gestacional[22-25], que es un enfoque analítico para el cual existen precedentes sólidos.[26] Si bien observamos dos diferencias mínimas en las características al inicio entre las cohortes del estudio SAFE y los controles históricos, con base en la literatura existente y un metanálisis de la eficacia del régimen a diferentes edades gestacionales, no esperamos que una diferencia de varios días de gestación por debajo de las 9 semanas ni una diferencia en la edad de participación de entre 1 y 4 años puedan provocar diferencias importantes en la compleción del aborto.[32] Este estudio también tuvo una proporción de abandono de las participantes de - 4 % que no pudieron ser contactadas después del inicio. Para dar cuenta de esto, estimamos de manera conservadora la eficacia como si todas las participantes para el seguimiento hubieran tenido un aborto fallido. Sin embargo, el verdadero efecto de las fuentes potenciales de sesgo podría ser mucho menor, y un análisis futuro podría cuantificar esto. Por último, este estudio no se diseñó para comparar el régimen combinado

446 con el de solo misoprostol, sino para evaluar de manera individual la eficacia de cada régimen en el  
447 entorno de autogestión en comparación con la literatura publicada sobre el aborto con medicamentos en  
448 un entorno clínico. Por lo tanto, les aconsejamos a los lectores no realizar comparaciones entre los  
449 resultados informados en el grupo de régimen combinado versus el grupo de solo misoprostol del estudio  
450 SAFE. Estas limitaciones se equilibran por la naturaleza única de la muestra del estudio, que nos permitió  
451 realizar un seguimiento prospectivo de las participantes que estaban autogestionando un aborto en dos  
452 entornos diferentes: la muestra grande y de potencia adecuada y la pequeña de pérdidas para el  
453 seguimiento.

454 En conclusión, el aborto con medicamentos autogestionado con apoyo de acompañamiento es  
455 altamente eficaz y seguro. En adelante, los gobiernos, los organismos profesionales y los médicos clínicos  
456 deberían confiar en las evidencias para que encaminen sus políticas y prácticas hacia enfoques  
457 autogestionados para el aborto con medicamentos, y enfocarse en expandir el acceso al aborto con  
458 medicamentos en un rango de modelos de prestación de servicios, incluso el uso por cuenta propia.

459

460

**Declaración de contribución de las autoras:** BG, CG, HM, IAK, IE, RJ, RM, RZ, y SN contribuyeron a la conceptualización y diseño del estudio cuantitativo, CB, HM, RJ, RM, y SC gestionaron la recopilación y la calidad de la información, y HM y RJ realizaron los análisis cuantitativos. HM estuvo a cargo de la redacción del manuscrito, con aportes, revisión y aprobación de todos los autores. Todas las autoras leyeron y aprobaron el manuscrito final. Todas las autoras tuvieron acceso a toda la información del estudio, y dos autoras (HM y RJ) tuvieron acceso a la información y la verificaron. CG, HM, y RJ fueron responsables de la decisión de presentar el manuscrito.

**Declaración de intereses:** Declaramos que no tenemos intereses en conflicto.

**Compartir información:** El protocolo, el plan de análisis y los instrumentos del estudio están disponibles en línea para la comunidad científica en (<https://bmjopen.bmj.com/content/10/11/e036800>). Todas las solicitudes de información deben ser enviadas por correo electrónico a la Investigadora principal a ([hmoseson@ibisreproductivehealth.org](mailto:hmoseson@ibisreproductivehealth.org)) para su consideración. Se podría otorgar acceso a información anonimizada luego de la revisión y aprobación de una nota conceptual iniciada por un investigador por parte de la Investigadora principal y el Comité de Supervisión y Monitoreo de Datos, y luego de que el investigador firme un acuerdo de acceso a la información.

**Agradecimientos:** Este estudio fue financiado por una subvención de la fundación David and Lucille Packard a CG, HM y RJ. HM cuenta con el apoyo parcial de una beca de un Instituto Nacional de Salud (1R21CA256759-01). Agradecemos a las participantes del estudio que hayan compartido información acerca de sus procesos de aborto autogestionado con el equipo del estudio. También agradecemos a Ilana Dzuba, Sofia Filippa, Brianna Keefe-Oates, Onikepe Owolabi, Maria Yasinta, y al equipo de La Revuelta por sus inmensos aportes a este trabajo de diversas formas.

## 485    **Referencias**

- 486    1.        WHO. Medical Management of Abortion Geneva, Switzerland: World Health Organization; 2018  
487    [Available from: <https://apps.who.int/iris/bitstream/handle/10665/278968/9789241550406-eng.pdf?ua=1>.  
488    2.        Rodriguez MI, Seuc A, Kapp N, von Hertzen H, Huong NT, Wojdyla D, et al. Acceptability of  
489    misoprostol-only medical termination of pregnancy compared with vacuum aspiration: an international,  
490    multicentre trial. BJOG. 2012;119(7):817-23. DOI: 10.1111/j.1471-0528.2012.03310.x.
- 491    3.        Winikoff B, Sivin I, Coyaji KJ, Cabezas E, Bilian X, Sujuan G, et al. Safety, efficacy, and  
492    acceptability of medical abortion in China, Cuba, and India: A comparative trial of mifepristone-  
493    misoprostol versus surgical abortion. Am J Obstet Gynecol. 1997;176(2):431-7. DOI: 10.1016/s0002-  
494    9378(97)70511-8.
- 495    4.        Kulier R, Kapp N, Gulmezoglu AM, Hofmeyr GJ, Cheng L, Campana A. Medical methods for  
496    first trimester abortion. Cochrane Database Syst Rev. 2011(11):CD002855. DOI:  
497    10.1002/14651858.CD002855.pub4.
- 498    5.        Chen MJ, Creinin MD. Mifepristone With Buccal Misoprostol for Medical Abortion: A  
499    Systematic Review. Obstet Gynecol. 2015;126(1):12-21. DOI: 10.1097/AOG.0000000000000897.
- 500    6.        Raymond EG, Harrison MS, Weaver MA. Efficacy of Misoprostol Alone for First-Trimester  
501    Medical Abortion: A Systematic Review. Obstet Gynecol. 2019;133(1):137-47. DOI:  
502    10.1097/AOG.0000000000003017.
- 503    7.        Kapp N, Eckersberger E, Lavelanet A, Rodriguez MI. Medical abortion in the late first trimester:  
504    a systematic review. Contraception. 2019;99(2):77-86. DOI: 10.1016/j.contraception.2018.11.002.
- 505    8.        Ferguson I, Scott H. Systematic Review of the Effectiveness, Safety, and Acceptability of  
506    Mifepristone and Misoprostol for Medical Abortion in Low- and Middle-Income Countries. J Obstet  
507    Gynaecol Can. 2020;42(12):1532-42 e2. DOI: 10.1016/j.jogc.2020.04.006.
- 508    9.        Rocca CH, Puri M, Shrestha P, Blum M, Maharjan D, Grossman D, et al. Effectiveness and  
509    safety of early medication abortion provided in pharmacies by auxiliary nurse-midwives: A non-  
510    inferiority study in Nepal. PLoS One. 2018;13(1):e0191174. DOI: 10.1371/journal.pone.0191174.
- 511    10.       Starrs AM, Ezech AC, Barker G, Basu A, Bertrand JT, Blum R, et al. Accelerate progress—sexual  
512    and reproductive health and rights for all: report of the Guttmacher– Lancet Commission. The Lancet.  
513    2018;391(10140):2642-92. DOI: 10.1016/s0140-6736(18)30293-9.
- 514    11.       Moseson H, Herold S, Filippa S, Barr-Walker J, Baum SE, Gerdtts C. Self-managed abortion: A  
515    systematic scoping review. Best Practice & Research Clinical Obstetrics & Gynaecology. 2019. DOI:  
516    10.1016/j.bpobgyn.2019.08.002.
- 517    12.       Ganantra B, Gerdtts C, Rossier C, Johnson Jr B, Tuncalp O, Assifi A, et al. Global, regional, and  
518    subregional classification of abortions by safety, 2010-14: estimates from a Bayesian hierarchical model.  
519    Lancet. 2017;390:2372-81. DOI: [http://dx.doi.org/10.1016/S0140-6736\(17\)31794-4](http://dx.doi.org/10.1016/S0140-6736(17)31794-4).
- 520    13.       Braine N. Autonomous Health Movements: Criminalization, De-medicalization, and  
521    Community-Based Direct Action. Health Hum Rights. 2020;22(2):85-97. DOI.
- 522    14.       Foster AM, Arnott G, Hobstetter M. Community-based distribution of misoprostol for early  
523    abortion: evaluation of a program along the Thailand Burma border. Contraception. 2017;96(4):242-7.  
524    DOI: 10.1016/j.contraception.2017.06.006.

15. Stillman M, Owolabi O, Akinyemi A, Moore A, Bankole A, Fatusi A, et al. Women's self-reported experiences using misoprostol obtained from drug sellers: a prospective cohort study in Lagos State, Nigeria. *BMJ Open*. 2020(IN PRESS). DOI.
16. Moseson H, Keefe-Oates B, Jayaweera RT, Filippa S, Motana R, Bercu C, et al. Studying Accompaniment model Feasibility and Effectiveness (SAFE) Study: study protocol for a prospective observational cohort study of the effectiveness of self-managed medication abortion. *BMJ Open*. 2020;10(11):e036800. DOI: 10.1136/bmjopen-2020-036800.
17. Ralph L, Foster DG, Raifman S, Biggs MA, Samari G, Upadhyay U, et al. Prevalence of Self-Managed Abortion Among Women of Reproductive Age in the United States. *JAMA Netw Open*. 2020;3(12):e2029245. DOI: 10.1001/jamanetworkopen.2020.29245.
18. Moseson H, Jayaweera R, Raifman S, Keefe-Oates B, Filippa S, Motana R, et al. Self-managed medication abortion outcomes: results from a prospective pilot study. *Reprod Health*. 2020;17(1):164. DOI: 10.1186/s12978-020-01016-4.
19. Okorie PC, Abayomi OA. Abortion laws in Nigeria: A Case for Reform. *Annual Survey of International and Comparative Law*. 2019;23(1):165-92. DOI.
20. Código Penal de la Nación Argentina, (1984).
21. Schmidt-Hansen M, Cameron S, Lohr PA, Hasler E. Follow-up strategies to confirm the success of medical abortion of pregnancies up to 10 weeks' gestation: A systematic review with meta-analyses. *Am J Obstet Gynecol*. 2019. DOI: 10.1016/j.ajog.2019.11.1244.
22. von Hertzen H, Piaggio G, Huong NTM, Arustamyan K, Cabezas E, Gomez M, et al. Efficacy of two intervals and two routes of administration of misoprostol for termination of early pregnancy: a randomised controlled equivalence trial. *The Lancet*. 2007;369(9577):1938-46. DOI: 10.1016/s0140-6736(07)60914-3.
23. von Hertzen H, Huong NT, Piaggio G, Bayalag M, Cabezas E, Fang AH, et al. Misoprostol dose and route after mifepristone for early medical abortion: a randomised controlled noninferiority trial. *BJOG*. 2010;117(10):1186-96. DOI: 10.1111/j.1471-0528.2010.02636.x.
24. Tang OS, Chan CC, Ng EH, Lee SW, Ho PC. A prospective, randomized, placebo-controlled trial on the use of mifepristone with sublingual or vaginal misoprostol for medical abortions of less than 9 weeks gestation. *Hum Reprod*. 2003;18(11):2315-8. DOI: 10.1093/humrep/deg475.
25. Tang OS, Xu J, Cheng L, Lee SW, Ho PC. Pilot study on the use of sublingual misoprostol with mifepristone in termination of first trimester pregnancy up to 9 weeks gestation. *Hum Reprod*. 2002;17(7):1738-40. DOI: 10.1093/humrep/17.7.1738.
26. Viele K, Berry S, Neuenschwander B, Amzal B, Chen F, Enas N, et al. Use of historical control data for assessing treatment effects in clinical trials. *Pharm Stat*. 2014;13(1):41-54. DOI: 10.1002/pst.1589.
27. Aiken A, Lohr PA, Lord J, Ghosh N, Starling J. Effectiveness, safety and acceptability of no-test medical abortion provided via telemedicine: a national cohort study. *BJOG*. 2021. DOI: 10.1111/1471-0528.16668.
28. Jayaweera RT, Moseson H, Gerdts C. Misoprostol in the era of COVID-19: a love letter to the original medical abortion pill. *Sex Reprod Health Matters*. 2020;28(1):1829406. DOI: 10.1080/26410397.2020.1829406.

29. Gerds C, Jayaweera RT, Kristianingrum IA, Khan Z, Hudaya I. Effect of a smartphone intervention on self-managed medication abortion experiences among safe-abortion hotline clients in Indonesia: A randomized controlled trial. *Int J Gynaecol Obstet*. 2020;149(1):48-55. DOI: 10.1002/ijgo.13086.
30. Bracken H, Clark W, Lichtenberg ES, Schweikert SM, Tanenhaus J, Barajas A, et al. Alternatives to routine ultrasound for eligibility assessment prior to early termination of pregnancy with mifepristone-misoprostol. *BJOG*. 2011;118(1):17-23. DOI: 10.1111/j.1471-0528.2010.02753.x.
31. Raymond E, Chong E, Winikoff B, Platais I, Mary M, Lotarevich T, et al. TelAbortion: evaluation of a direct to patient telemedicine abortion service in the United States. *Contraception*. 2019;100(3):173-7. DOI: 10.1016/j.contraception.2019.05.013.
32. Ashok PW, Templeton A, Wagaarachchi PT, Flett GM. Factors affecting the outcome of early medical abortion: a review of 4132 consecutive cases. *BJOG*. 2002;109(11):1281-9. DOI: 10.1046/j.1471-0528.2002.02156.x.

581 **Tabla 1. Protocolos de medicamentos recomendados por las consejeras de los grupos de**  
582 **acompañamiento de aborto con base en la duración del embarazo**

| <b>Duración del embarazo</b> | <b>Mifepristona más misoprostol</b>                                                                                                                                                                                                                                                                                                                                                                                                                                                                                  | <b>Solo misoprostol</b>                                                                                                                                                                                                                                                                                                                                                                                                                                                                                                                                                                                                                                                                                          |
|------------------------------|----------------------------------------------------------------------------------------------------------------------------------------------------------------------------------------------------------------------------------------------------------------------------------------------------------------------------------------------------------------------------------------------------------------------------------------------------------------------------------------------------------------------|------------------------------------------------------------------------------------------------------------------------------------------------------------------------------------------------------------------------------------------------------------------------------------------------------------------------------------------------------------------------------------------------------------------------------------------------------------------------------------------------------------------------------------------------------------------------------------------------------------------------------------------------------------------------------------------------------------------|
| Hasta 90 días                | Tragar 1 comprimido de mifepristona (200 mg) por vía oral; después de 24 a 48 horas, poner 4 píldoras de misoprostol (800 mcg) debajo de la lengua (sublingual), dejar que se disuelvan durante 30 minutos, y seguir tragando hasta que las píldoras se disuelvan, o colocarlas en la vagina (vaginal); si, después de 3 horas, no hay ningún signo de reacción, efectos secundarios o expulsión, poner 2 píldoras adicionales de misoprostol (400 mcg) debajo de la lengua o en la vagina y dejar que se disuelvan. | Poner cuatro píldoras (800 µg) debajo de la lengua (sublingual), dejar que se disuelvan durante 30 minutos, continuar tragando saliva hasta que las píldoras se disuelvan; después de 3 horas, poner la segunda dosis de cuatro píldoras (800 µg) debajo de la lengua y dejar que se disuelvan durante 30 minutos y continuar tragando saliva hasta que las píldoras se disuelvan; después de 3 horas, poner una tercera dosis de cuatro píldoras (800 µg) debajo de la lengua y dejar que se disuelvan durante 30 minutos y continuar tragando saliva hasta que las píldoras se disuelvan; continuar con dos a cuatro píldoras de misoprostol debajo de la lengua cada tres horas hasta que ocurra la expulsión |
| Más de 90 días*              | Tragar un comprimido de mifepristona (200 mg) por vía oral; después de 36 a 48 horas, poner dos píldoras de misoprostol (400 µg) debajo de la lengua (sublingual), dejar que se disuelvan durante 30 minutos y continuar tragando saliva hasta que las píldoras se disuelvan; después de 3 horas, poner dos píldoras de misoprostol adicionales (400 µg) debajo de la lengua y dejar que se disuelvan; continuar con dos píldoras de misoprostol debajo de la lengua cada 3 horas hasta que ocurra la expulsión.     | Poner dos píldoras (400 µg) debajo de la lengua (sublingual), dejar que se disuelvan durante 30 minutos y continuar tragando saliva hasta que las píldoras se disuelvan; después de 3 horas, poner la segunda dosis de dos píldoras (400 µg) debajo de la lengua y dejar que se disuelvan durante 30 minutos, y continuar tragando saliva hasta que las píldoras se disuelvan; después de 3 horas, poner una tercera dosis de dos píldoras (400 µg) debajo de la lengua y dejar que se disuelvan durante 30 minutos y continuar tragando saliva hasta que las píldoras se disuelvan; continuar con dos píldoras de misoprostol debajo de la lengua cada 3 horas hasta que ocurra la expulsión                    |

583 \*Se pueden encontrar detalles adicionales de los procedimientos para el aborto autogestionado más allá de  
584 las 12 semanas en otros sitios <sup>21,22</sup>

Figura 1. Perfil del ensayo

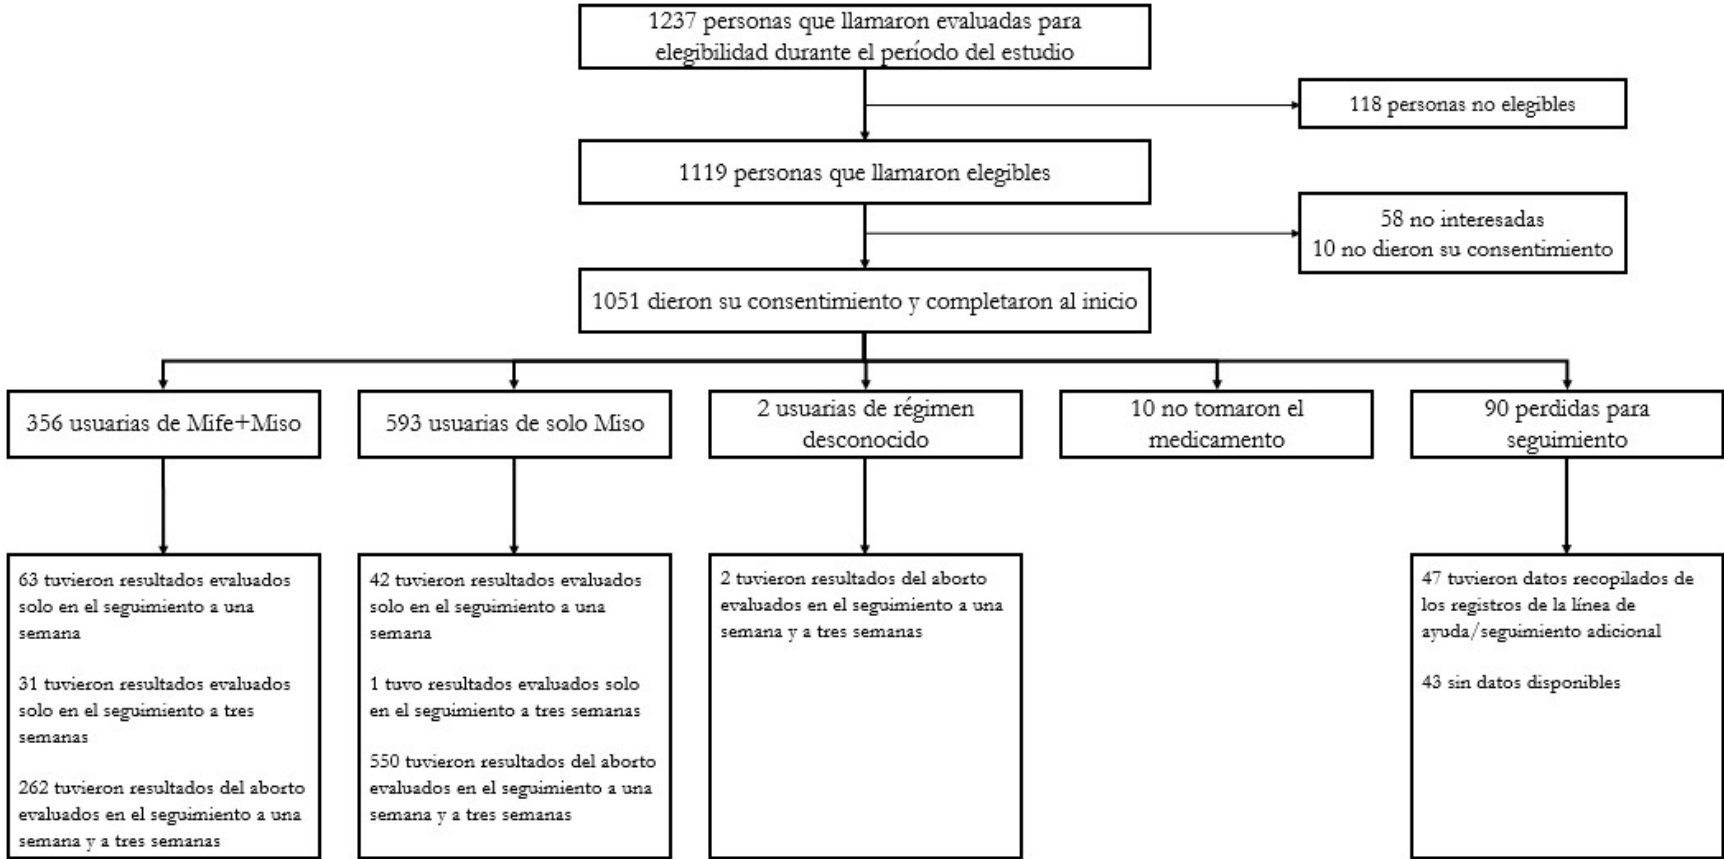

587 **Tabla 2. Características sociodemográficas y del embarazo de las participantes**

|                                                    | Todos los regímenes |       | Mife+Miso |       | Solo Misopros tol |       | Desconocido |        |
|----------------------------------------------------|---------------------|-------|-----------|-------|-------------------|-------|-------------|--------|
|                                                    | n                   | %     | n         | %     | n                 | %     | n           | %      |
| <i>N al inicio</i>                                 | 1051                | 100   | 356       | 100   | 593               | 100   | 102         | 100    |
| <b>Edad de la participante (años)</b>              |                     |       |           |       |                   |       |             |        |
| Mediana de edad de la participante (DE)            | 28.1                | (6,0) | 27.5      | (6,3) | 28,5              | (5,8) | 33,0        | (12,7) |
| 14 años                                            | 2                   | 0.2   | 2         | 0.6   | 0                 | 0     | 0           | 0.0    |
| 15 a 19 años                                       | 50                  | 4.8   | 27        | 7.6   | 17                | 2.9   | 6           | 5.9    |
| 20 a 24 años                                       | 271                 | 25.8  | 101       | 28.4  | 136               | 22.9  | 34          | 33.3   |
| 25 a 29 años                                       | 340                 | 32.4  | 103       | 28.9  | 214               | 36.1  | 23          | 22.5   |
| 30 a 34 años                                       | 211                 | 20.1  | 73        | 20.5  | 116               | 19.6  | 22          | 21.6   |
| 35 a 39 años                                       | 137                 | 13    | 35        | 9.8   | 89                | 15    | 13          | 12.7   |
| 40 a 44 años                                       | 36                  | 3.4   | 15        | 4.2   | 18                | 3     | 3           | 2.9    |
| 45 a 49 años                                       | 3                   | 0.3   | 0         | 0     | 2                 | 0.3   | 1           | 1.0    |
| 50 años                                            | 1                   | 0.1   | 0         | 0     | 1                 | 0.2   | 0           | 0.0    |
| <b>Nivel de educación</b>                          |                     |       |           |       |                   |       |             |        |
| Ninguna escolarización                             | 2                   | 0.2   | 2         | 0.6   | 0                 | 0     | 0           |        |
| Escuela primaria completa                          | 134                 | 12.7  | 97        | 27.2  | 14                | 2.4   | 23          | 22.5   |
| Escuela secundaria completa                        | 397                 | 37.8  | 117       | 32.9  | 248               | 41.8  | 32          | 31.4   |
| Superior a la escuela secundaria                   | 518                 | 49.3  | 140       | 39.3  | 331               | 55.8  | 47          | 46.1   |
| <b>Información del embarazo (seleccionar todo)</b> |                     |       |           |       |                   |       |             |        |
| Se realizó prueba de embarazo en el hogar          | 700                 | 66.6  | 292       | 82    | 334               | 56.3  | 74          | 72.5   |
| Se realizó prueba de sangre en una institución     | 285                 | 27.1  | 55        | 15.4  | 205               | 34.6  | 25          | 24.5   |
| Se realizó prueba de orina en una institución      | 114                 | 10.8  | 2         | 0.6   | 105               | 17.7  | 7           | 6.9    |
| Ecografía                                          | 113                 | 10.8  | 89        | 25    | 7                 | 1.2   | 17          | 16.7   |
| Retraso/ausencia del período                       | 37                  | 3.5   | 31        | 8.7   | 1                 | 0.2   | 5           | 4.9    |
| Síntomas de embarazo                               | 13                  | 1.2   | 11        | 3.1   | 0                 | 0     | 2           | 2.0    |
| Otros                                              | 1                   | 0.1   | 0         | 0     | 0                 | 0     | 1           | 1.0    |
| <b>Duración del embarazo</b>                       |                     |       |           |       |                   |       |             |        |
| Mediana de duración del embarazo (DE)              | 7.0                 | (2,2) | 7,6       | (2,6) | 6,7               | (1,8) | 7,0         | (1,4)  |
| <7 semanas                                         | 518                 | 49.4  | 141       | 39.6  | 330               | 55.8  | 47          | 46.1   |
| [7 a 9) semanas                                    | 340                 | 32.4  | 134       | 37.6  | 174               | 29.3  | 32          | 31.4   |
| [9 a 12) semanas                                   | 141                 | 13.3  | 50        | 14    | 75                | 12.5  | 16          | 15.7   |
| [12 a 22] semanas                                  | 52                  | 4.9   | 31        | 8.7   | 14                | 2.4   | 7           | 6.9    |

588

589 **Tabla 3. Completación del aborto**

| Completación del aborto                   | Cualquier régimen <sup>1</sup> |      | Mifepristona + misoprostol |      |            |      |                 |      |                  |      |                   |      | Solo misoprostol      |      |            |      |                 |      |                  |      |                   |      |
|-------------------------------------------|--------------------------------|------|----------------------------|------|------------|------|-----------------|------|------------------|------|-------------------|------|-----------------------|------|------------|------|-----------------|------|------------------|------|-------------------|------|
|                                           |                                |      | Todas las gestaciones      |      | <7 semanas |      | [7 a 9) semanas |      | [9 a 12) semanas |      | [12 a 22] semanas |      | Todas las gestaciones |      | <7 semanas |      | [7 a 9) semanas |      | [9 a 12) semanas |      | [12 a 22] semanas |      |
|                                           | n = 919 <sup>2</sup>           | %    | n = 325                    | %    | n = 132    | %    | n = 122         | %    | n = 45           | %    | n = 26            | %    | n = 592               | %    | n = 329    | %    | n = 174         | %    | n = 75           | %    | n = 14            | %    |
| Una semana después de tomar las píldoras: |                                |      |                            |      |            |      |                 |      |                  |      |                   |      |                       |      |            |      |                 |      |                  |      |                   |      |
| Completado sin intervención quirúrgica    | 868                            | 94.5 | 300                        | 92.3 | 126        | 95.5 | 112             | 91.8 | 41               | 91.1 | 21                | 80.8 | 566                   | 95.6 | 317        | 96.4 | 165             | 94.8 | 70               | 93.3 | 14                | 100  |
| Completado con intervención quirúrgica    | 10                             | 1.1  | 9                          | 2.8  | 1          | 0.8  | 2               | 1.6  | 2                | 4.4  | 4                 | 15.4 | 1                     | 0.2  | 1          | 0.3  | 0               | 0    | 0                | 0    | 0                 | 0    |
| No completado/No está segura              | 40                             | 4.4  | 16                         | 4.9  | 5          | 3.8  | 8               | 6.6  | 2                | 4.4  | 1                 | 3.8  | 24                    | 4.1  | 11         | 3.3  | 9               | 5.2  | 4                | 5.3  | 0                 | 0    |
| Sin información                           | 1                              | 0.1  | 0                          | 0.0  | 0          | 0.0  | 0               | 0.0  | 0                | 0.0  | 0                 | 0.0  | 1                     | 0.2  | 0          | 0.0  | 0               | 0.0  | 1                | 1.3  | 0                 | 0.0  |
|                                           | n = 951                        | %    | n = 356                    | %    | n = 141    | %    | n = 134         | %    | n = 50           | %    | n = 31            | %    | n = 593               | %    | n = 330    | %    | n = 174         | %    | n = 75           | %    | n = 14            | %    |
| En el último seguimiento:                 |                                |      |                            |      |            |      |                 |      |                  |      |                   |      |                       |      |            |      |                 |      |                  |      |                   |      |
| Completado sin intervención quirúrgica    | 922                            | 97.0 | 334                        | 93.8 | 134        | 95   | 131             | 97.8 | 46               | 92.0 | 23                | 74.2 | 586                   | 98.8 | 327        | 99.1 | 172             | 98.9 | 74               | 98.7 | 13                | 92.9 |
| Completado con intervención quirúrgica    | 17                             | 1.8  | 14                         | 3.9  | 2          | 1.4  | 2               | 1.5  | 3                | 6.0  | 7                 | 22.6 | 3                     | 0.5  | 2          | 0.6  | 0               | 0.0  | 0                | 0.0  | 1                 | 7.1  |
| No completado/No está segura              | 10                             | 1.1  | 8                          | 2.2  | 5          | 3.5  | 1               | 0.7  | 1                | 2    | 1                 | 3.2  | 2                     | 0.3  | 1          | 0.3  | 1               | 0.6  | 0                | 0    | 0                 | 0.0  |
| Sin información                           | 2                              | 0.2  | 0                          | 0.0  | 0          | 0.0  | 0               | 0.0  | 0                | 0.0  | 0                 | 0.0  | 2                     | 0.3  | 0          | 0    | 1               | 0.6  | 1                | 1.4  | 0                 | 0.0  |

590

591 <sup>1</sup> Incluye a 2 personas con régimen desconocido de aborto con medicamentos

592 <sup>2</sup> 32 personas que no completaron un primer seguimiento se excluyen del denominador

593

594

595

596

597

598

**Figura 2. Evaluación de ausencia de inferioridad de la eficacia del aborto con medicamentos autogestionado, según el estudio SAFE entre 779 participantes con embarazos de <9 semanas de gestación, en comparación con la eficacia del aborto con medicamentos gestionado por un médico clínico, según lo medido en ensayos clínicos históricos entre 1463 participantes con embarazos de <9 semanas de gestación**

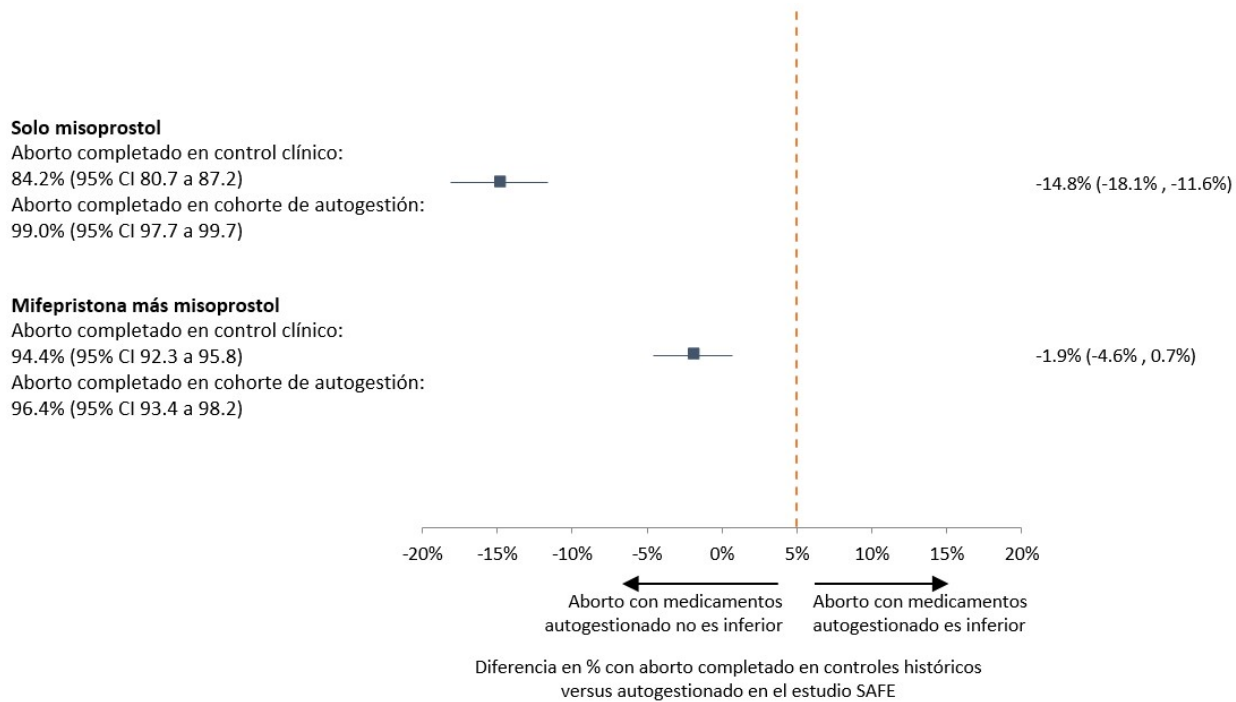

Supplement: mmc4.pdf [file mmc4.pdf]
