# Supplementary material
Source: PubMed Central journal article supplement (PMC9359894)
Supplement: mmc1.pdf [file mmc1.pdf]

# THE LANCET

## Global Health

### Supplementary appendix 1

This translation in Arabic was submitted by the authors and we reproduce it as supplied. It has not been peer reviewed. The Lancet's editorial processes have only been applied to the original in English, which should serve as reference for this manuscript.

تم تقديم هذه الترجمة باللغة العربية من قبل المؤلفين ونعيد إنتاجها كما هو مُقدم. إنها لم تخضع لاستعراض الأقران. تم تطبيق عمليات تحرير/التسييت فقط على النص الأصلي باللغة الإنجليزية، والذي يجب أن يكون بمثابة مرجع لهذه المخطوطة.

Supplement to: Moseson H, Jayaweera R, Egwuatu I, et al. Effectiveness of self-managed medication abortion with accompaniment support in Argentina and Nigeria (SAFE): a prospective, observational cohort study and non-inferiority analysis with historical controls. *Lancet Glob Health* 2021; published online Nov 18. [http://dx.doi.org/10.1016/S2214-109X\(21\)00461-7](http://dx.doi.org/10.1016/S2214-109X(21)00461-7).

1 **العنوان:** فعّاليّة الإجهاض الدوائيّ المُسيّر ذاتيّاً في وجود دعم مصاحب في الأرجنتين ونيجريا: دراسة أقران استطلاعيّة قائمة على الملاحظة  
2 والتحليل لاختبار عدم الدونية بضوابط تاريخية

3 **المؤلفون:** Heidi Moseson، درجة الدكتوراة<sup>1\*</sup>، Ruvani Jayaweera، درجة الدكتوراة<sup>1</sup>، Ijeoma Egwuatu، بكالوريوس العلوم<sup>2</sup>،  
4 Belen Grosso، بكالوريوس الآداب<sup>3</sup>، Ika Ayu Kristianingrum، ماجستير الآداب<sup>4</sup>، Sybil Nmezi، ماجستير الآداب<sup>2</sup>، Ruth  
5 Zurbriggen، ماجستير التربية<sup>3</sup>، PDMRelebohile Motana<sup>5</sup>، Chiara Bercu، ماجستير الإدارة العامة<sup>1</sup>، Sofia Carbone،  
6 ماجستير الصحة العامة<sup>1</sup>، Caitlin Gerdts، درجة الدكتوراة<sup>1</sup>.

7 **مؤسسات المؤلفين:**

8 <sup>1</sup> مؤسسة Ibis Reproductive Health، الكائنة في: 1736 Franklin Street, Suite 600, Oakland, California, USA 94612  
9 <sup>2</sup> Generation Initiative for Women and Youth (مبادرة الأجيال للنساء والشباب)، ولاية لاغوس، نيجيريا  
10 <sup>3</sup> مؤسسة La Revuelta Colectiva Feminista، نيوكوين، الأرجنتين

11 <sup>4</sup> مؤسسة Samsara، يوغياكارتا، إندونيسيا

12 <sup>5</sup> مؤسسة Ibis Reproductive Health، الكائنة في: Postnet Suite # 197, Private Bag X2600, Houghton 2041,  
13 Johannesburg, South Africa

14 **\*المؤلفة المسؤولة عن المراسلات**

15 Heidi Moseson، الدكتوراة وماجستير الصحة العامة  
16 Ibis Reproductive Health  
17 Suite 600، 1736 Franklin Street  
18 CA 94612، Oakland  
19 الهاتف: +1.510.822.2696  
20 البريد الإلكتروني: [hmoseson@ibisreproductivehealth.org](mailto:hmoseson@ibisreproductivehealth.org)

21 **الكلمات المفتاحية:** الإجهاض، المصاحب، مايفريستون، ميزوبروستول، الإجهاض المُسيّر ذاتيّاً

22  
23 **التمويل** مؤسسة ديفيد ولوسيل باكارد (David and Lucile Packard Foundation).

24  
25 حقوق النشر © 2021 المؤلف (المؤلفون). تم النشر بواسطة شركة Elsevier Ltd. هذا مقال مزود بإمكانية الإتاحة الحرة بموجب  
26 الإصدار 4.0 من رخصة المشاع الإبداعي (CC).

28 لقد أثبتت التجارب السريرية المرجعية مستوى عالٍ من الفعّالية والأمان للإجهاض الدوائي في مرافق الرعاية السريرية. ومع ذلك، فإن  
29 العوائق التي تشهدها الرعاية السريرية لحالات الإجهاض قد حوّلت معظم استخدام الإجهاض الدوائي إلى خارج أماكن الرعاية السريرية،  
30 وخاصة في سياق جائحة كوفيد-19. وبالنظر إلى هذا التحوّل، فقد هدفنا إلى تقدير فعّالية الإجهاض الدوائي المُسيّر ذاتيًا (إجهاض دوائي  
31 دون دعم سريري طبي) ومقارنتها بفعّالية الإجهاض الدوائي المُسيّر على يد الأطباء.

32 المنهجية: بغرض إجراء دراسة الأقران الاستطلاعية القائمة على الملاحظة هذه، تمت الاستعانة بمسؤولين لإجراء المكالمات الهاتفية  
33 من مجموعتين من مجموعات المرافقة في عمليات الإجهاض الآمنة في الأرجنتين ونيجيريا، وعكف مسؤولو المكالمات على طلب  
34 المعلومات المتعلقة بالإجهاض الدوائي المُسيّر ذاتيًا. وقبل استخدام أحد النظامين الدوائيين (الميزوبروستول بمفرده، أو بالاشتراك مع  
35 المايفيريستون)، أكملت المُشاركات مسحًا أساسيًا، ثم استبيانين عبر الهاتف للمتابعة بعد أسبوع واحد وبعد 3 أسابيع من تناول الحبوب.  
36 وكانت النتيجة الأولية هي نسبة المُشاركات اللاتي أبلغن عن إجراء إجهاض كامل دون تدخلٍ جراحي. وقد حالت القيود القانونية والأخلاقية  
37 دون تسجيل مجموعة للمراقبة السريرية في وقت متزامن؛ ولذلك فقد قام تحليل عدم الدونية بمقارنة حالات إتمام (اكتمال) الإجهاض  
38 الواقعة بين مجموعة الإجهاض الدوائي المُسيّر ذاتيًا لدينا مع حالات إتمام (اكتمال) الإجهاض المبلغ عنها في التجارب السريرية التاريخية  
39 باستخدام نفس الأنظمة الدوائية، وبحيث يقتصر على المُشاركات اللاتي لم يُكْمَل أعمار حملهن 9 أسابيع منذ بدء الحمل. وقد سُجّلت  
40 هذه الدراسة لدى سجل ISCRTN تحت رقم ISRCTN95769543.

41 النتائج: لقد سجلنا 1,051 مُشاركة خلال الفترة بين 31 يوليو 2019 و27 أبريل 2020. وقد حللنا نتائج الإجهاض لدى 961 مشاركة،  
42 مع إضافة 47 مُشاركة تم التواصل معهن بعد فترة الدراسة. وكانت مدة معظم حالات الحمل تقل عن 12 أسبوعًا منذ بدء الحمل. وقد  
43 قامت المُشاركات المدرجات بالمتابعة بتسيير حالات الإجهاض لديهن تسييرًا ذاتيًا باستخدام الميزوبروستول بمفرده (593 مُشاركة) أو  
44 باستخدام النظام المزدوج الذي يجمع بين الميزوبروستول والمايفيريستون (356 مُشاركة). في المتابعة الأخيرة، كانت 586 حالة (99٪)  
45 من مستخدمات الميزوبروستول بمفرده و334 حالة (94٪) من مستخدمات النظام المزدوج قد أجهضن حملهن بالكامل دون تدخلٍ  
46 جراحي. وبالنسبة لأولئك المُشاركات اللاتي لم يُكْمَل حملهن 9 أسابيع منذ بدء الحمل، فقد أثبت كلا النظامين أن فعّالتهما لا تقل عن  
47 فعّالية الإجهاض الدوائي في مرافق الرعاية السريرية.

48 التفسير: تُوضّح النتائج المُستخلصة من دراسة الأقران الاستطلاعية الحالية أن الإجهاض الدوائي المُسيّر ذاتيًا من خلال دعم مجموعة  
49 مُصاحبة يعتبر فعّالًا للغاية، وأن فعّالتيه -بالنسبة للنساء اللاتي لم يُكْمَل حملهن عمر 9 أسابيع منذ بدء الحمل- لا تقل عن مستوى فعّالية  
50 الإجهاض الدوائي الذي يُدار على يد الأطباء في أماكن الرعاية السريرية. وتُدعّم هذه النتائج من استخدام نماذج التسيير الذاتي عن بُعد  
51 لرعاية الإجهاض المبكر، بما يتضمن التطبيق عن بعد، على النحو المنظور فيه لدى العديد من البلدان بسبب جائحة كوفيد-19.

54  
55  
56 ولفهم ما هو معروف عن فعالية وسلامة الإجهاض الدوائي المُسيّر ذاتيًا خارج مرافق الرعاية السريرية، أجرينا مراجعة منهجية استكشافية  
57 للنطاق للأدبيات المتعلقة بفعالية الإجهاض المُسيّر ذاتيًا في ثمانية من قواعد بيانات الطب الأحيائي والصحة العامة باللغة الإنجليزية  
58 والإسبانية دون فرض قيود على التاريخ أو مدة الحمل. وقد نُشرت هذه المراجعة سابقًا، وقد حددت ثمانية من الدراسات التي أشارت  
59 إلى وجود فعالية عالية للإجهاض الدوائي المُسيّر ذاتيًا. ومنذ نشر هذه المراجعة، نُشرت العديد من الدراسات الإضافية حول فعالية  
60 الإجهاض الدوائي المُسيّر ذاتيًا. ومعظم هذه الدراسات هي عبارة عن تحليلات للسوابق (ذات أثر رجعي) وتشير إلى ارتفاع مستويات إتمام  
61 (اكتمال) الإجهاض عند اتباع الإجهاض الدوائي المُسيّر ذاتيًا، بحيث تتراوح نسبة اكتمالها -حسب العمر الحملي- بين 48.3% و99.5%.  
62 وفي هذه المراجعة، حددنا عددًا قليلًا جدًا من الدراسات الاستطلاعية لاستخدام الإجهاض الدوائي المُسيّر ذاتيًا، ولم نقف على أي دراسات  
63 قد قدمت تقييمًا رسميًا لعدم دونية الإجهاض الدوائي المُسيّر ذاتيًا مقارنة بالإجهاض الدوائي السريري من ناحية إتمام (اكتمال) الإجهاض.  
64 وعلاوة على ذلك، لا تتطرق سوى دراسات قليلة لأسباب طلب الرعاية الصحية بعد الإجهاض المُسيّر ذاتيًا.

#### القيمة المُضافة لهذه الدراسة

65  
66 تثبت نتائج هذه الدراسة الاستطلاعية متعددة البلدان أن الإجهاض الدوائي المُسيّر ذاتيًا باستخدام المايغبريستون والميزوبروستول معًا،  
67 وكذلك باستخدام الميزوبروستول بمفرده، يعتبر آمنًا وفعالًا للغاية؛ وبالنسبة لحالات الحمل التي تقل أعمارها عن 9 أسابيع من بدء  
68 الحمل، فقد أثبت أنه ليس أدنى في الفعالية من الإجهاض الدوائي في أماكن الرعاية السريرية. وقد نجحت السيدات اللاتي قمن بإدارة حالات  
69 الإجهاض لديهن ذاتيًا بأنفسهن مع مجموعة مصاحبة في الوصول إلى الرعاية بالعيادات والمستشفيات، وقد فعلن ذلك -في المقام الأول-  
70 بغرض التأكد من إتمام (اكتمال) الإجهاض، وليس بسبب مخاوف بخصوص السلامة.

#### الآثار المترتبة على جميع الأدلة المتاحة

71  
72 تُظهر البيانات المستخلصة من دراستنا أن الإجهاض المُسيّر ذاتيًا باستخدام الميزوبروستول بمفرده أو بالاشتراك مع المايغبريستون يعتبر  
73 إيجابيًا فعالًا للغاية. وبوضع هذه النتائج عين الاعتبار، ولضمان إمكانية الوصول إلى خدمات طبية آمنة وفعالة وروتينية، يجب على  
74 وزارات الصحة والهيئات المهنية والأطباء أنفسهم إزالة القيود والعوائق التي تحول دون اتباع النهج المُسيّر ذاتيًا للإجهاض الدوائي، وأن  
75 يقوموا -بدلاً من ذلك- بتسهيل الوصول إلى المعلومات الدقيقة عن الإجهاض الدوائي عبر مجموعة من نماذج تقديم الخدمات - بما  
76 يتضمن الاستخدام الذاتي. كما تشير النتائج المستخلصة من هذه الدراسة أيضًا إلى أن الإجهاض المُسيّر ذاتيًا مع تلقي الدعم من مجموعات

77 المصاحبة قد يمثل استراتيجية أساسية لتوسيع إمكانية الحصول على الرعاية الفعالة والآمنة لعمليات الإجهاض بغض النظر عن الإطار

78 القانوني.

79

80

82 أثبتت الأنظمة الدوائية الموصي بها من منظمة الصحة العالمية، والتي تتضمن المايفبريستون بلاشترك مع الميزوبروستون، أو  
 83 الميزوبروستون بمفرده، [1] نفسها باعتبارها أساليب آمنة وفعّالة لإنهاء الحمل. [2-4] وقد أظهرت التجارب السريرية مستويات عالية من  
 84 الفعالية والأمان بكلتا نظامي الإجهاض الدوائي خلال أول 63 يومًا من الحمل، [5، 6] وأثبتتها مؤخرًا حتى 84 يومًا من الحمل. [7] وقد  
 85 جُمعت بيانات هذه التجارب في سياق ذي الدخل المرتفع وذوي الدخل المنخفض، [8] ومن بين حالات الإجهاض التي تقدمها كوادر  
 86 متعددة من الجهات المقدمة للرعاية السريرية. [9، 10]

87 ويعتبر الإجهاض الدوائي طريقة آمنة وفعّالة ومنخفضة التكلفة وبسيطة نسبيًا لإنهاء الحمل. ومع ذلك فإن السياقات القانونية  
 88 التقييدية، ونقص مقدمي الرعاية المدربين على تقديمها أو المستعدين لتقديمها، وتكلفة الخدمات السريرية، وغيرها من المخاوف  
 89 اللوجستية والاجتماعية الأخرى تمثل عقبات مستمرة أمام تقديم خدمات الإجهاض المعتمدة على عيادات الرعاية. [11] وبناءً على ذلك،  
 90 تحدث معظم حالات الإجهاض التي تُجرى باستخدام الأدوية على مستوى العالم خارج أماكن الرعاية السريرية. [12] ويُشار إلى استخدام  
 91 الأدوية لإنهاء المرأة الحامل لحملها دون إشراف سريري باسم الإجهاض المُسَيَّر ذاتيًا. [11] وتتراوح أمثلة الإجهاض الدوائي المُسَيَّر ذاتيًا بين  
 92 الحصول على حبوب عبر الإنترنت أو من صيدلية محلية واستخدام الأدوية في المنزل دون دعم سريري، وبين الإجهاض المُسَيَّر ذاتيًا بدعم  
 93 من مجموعات مرافقة الإجهاض الآمن - حيث يقوم مستشارو إجهاض مدربون (لم يتدرب معظمهم على الرعاية السريرية) بتقديم المشورة  
 94 القائمة على الأدلة والدعم الذي يركز على الشخص (عبر الهاتف أو بالحضور شخصيًا) إلى الحامل التي تدير عملية الإجهاض ذاتيًا بنفسها.  
 95 وقد ظهر نموذج المرافقة في الإجهاض المُسَيَّر ذاتيًا باعتباره مساحةً للإجراء الصحي المستقل بذاته (التلقائي) ولتقرير المصير الذاتي بين  
 96 الحركات النسوية في مواجهتها لامتناع الدولة عن توفير رعاية آمنة لحالات الإجهاض. وتتسم هذه الحركة باستراتيجيات مجتمعية تقودها  
 97 الناشطات والناشطون من أجل تسهيل استخدام الأدوية المتاحة على نطاق واسع خارج أماكن الرعاية السريرية. [13] وبالنسبة لبعض  
 98 الناس، فإن الإجهاض الدوائي المُسَيَّر ذاتيًا يعتبر نموذجًا مفضّلًا للرعاية نظرًا لما يوفره من خصوصية وراحة؛ أما بالنسبة للبعض الآخر،  
 99 فهو مجرد خيار فقط حين يتعدّد الحصول إلى الرعاية السريرية. [11]

100 وتماشياً مع التجارب السريرية التي أثبتت أمان وفعالية الإجهاض الدوائي، ثمة مجموعة متنامية من الأدلة التي تثبت فعالية  
 101 وأمان الإجهاض الدوائي المُسَيَّر ذاتيًا. [11، 14، 15] ومع ذلك، وفي الكثير من الحالات، أدت قيود الدراسة ومحدوديتها، مثل الاعتماد  
 102 على مراجعات مسجلة بأثر رجعي (من حالات سابقة) وصغر أحجام العينات وفقدان المتابعة، إلى تقويض الاستفادة الكاملة من  
 103 النتائج. [16] وتوضح توجيهات منظمة الصحة العالمية الحاجة إلى دليل على سلامة الإجهاض الدوائي خارج العيادات وفعّاليته

104 ومقبوليته، خاصة في حالات الحمل التي تجاوزت 10 أسابيع من الحمل، كما توضح أيضًا الحاجة إلى فهم دور الفرد في التقييم الذاتي  
105 للأهلية وإتمام الإجهاض - خاصة بالنسبة لأنظمة استخدام عقار الميزوبروستول بمفرده التي أشارت البيانات السريرية إلى أنها أقل  
106 فعالية. [1] وعلاوة على ذلك، تصاعدت الدعوات الموجهة لإجراء جمعٍ دقيقٍ ومُحكّمٍ للبيانات المتعلقة بتجارب الناس مع الإجهاض  
107 المُسيّر ذاتيًا والسعي للحصول على الرعاية الصحية أثناء الإجهاض المُسيّر ذاتيًا وبعده، وذلك من أجل تحديد ما إذا كان بإمكان الأفراد  
108 تسيير عمليات الإجهاض الدوائي الكامل بأمان وفعالية. [12، 17]

109 وتوفر مجموعات المرافقة في الإجهاض أساسًا واعدًا لإجراء أبحاث استطلاعية دقيقة حول الإجهاض الدوائي المُسيّر ذاتيًا. [18]  
110 ولسد الثغرات الموجودة في الأبحاث المتعلقة بالإجهاض الدوائي المُسيّر ذاتيًا، أجرينا دراسة أتراب استطلاعية قائمة على الملاحظة بهدف  
111 تقدير فعالية كلا نظامي المايغبريستون مع الميزوبروستول (النظام المزدوج) والميزوبروستول بمفرده عند استخدام أي منهما لإنهاء الحمل  
112 دون الخضوع لإشراف سريري، ولكن بدعم من مجموعات مرافقة، كما أجريناها أيضًا بهدف عقد مقارنة رسميًا بين هذه الفعالية وبين  
113 فعالية الإجهاض الدوائي الذي يُدار على يد الأطباء والذي يظهر في التجارب السريرية التاريخية من خلال إجراء تحليل لعدم الدونية. ونظرًا  
114 للقيود القانونية المفروضة على الإجهاض في كلا الموقعين، فإن استخدام ذراع متزامن للإشراف السريري لم يكن ممكنًا ولا أخلاقيًا. وقد  
115 افترضنا أن فعالية الإجهاض الدوائي المُسيّر ذاتيًا باستخدام كلا النظامين ستكون فعالية كبيرة (< 90%) وأن فعالية الإجهاض الدوائي  
116 المُسيّر ذاتيًا لن تكون أدنى من فعالية الإجهاض الدوائي المدبّر في أماكن الرعاية السريرية بهامش عدم دونية نسبته 5%. [16]

117

118 **المنهجية**

119 **تصميم الدراسة والمشاركات فيها**

120 وقد قامت دراسة الجدوى والفعالية المصاحبة للدراسة (SAFE)، وهي دراسة أقران استطلاعية قائمة على الملاحظة، بتسجيل أشخاص  
121 عكفوا على التواصل مع مجموعة المرافقة في الإجهاض من أجل الحصول على الدعم والمعلومات المرتبطة بالإجهاض المُسيّر ذاتيًا،  
122 والمتابعة مع الحالات حتى 4 أسابيع لتقييم تجارب الإجهاض ونتائجه. وقد نُشرت النتائج المستخلصة من الدراسة التجريبية والتفاصيل  
123 الكاملة لبروتوكول الدراسة من قبل. [16، 18]

124 وقد تمت الاستعانة بمسؤولي اتصال من مجموعتين من مجموعات المرافقة في الإجهاض - إحداهما في الأرجنتين (وكان مقرها  
125 في نيوكوين، وتخدم مقاطعة نيوكوين بشكل أساسي)، والأخرى في نيجيريا (وكان مقرها في ولاية لاغوس، وتخدم البلد بأكمله). وقد كانت

126 عمليات الإجهاض، إبان جمع البيانات، محظورة قانونيًا في كلا الموقعين باستثناء فقط حالات إنقاذ حياة الأم الحامل في كلا البلدين، [19]  
127 وتضاف إليها حالات الاغتصاب في الأرجنتين. [20] وقد جرى التحقق من أهلية كل حامل تواصلت مع أي من المجموعتين خلال فترة  
128 الدراسة طلبًا للمعلومات المتعلقة بالإجهاض المُحدَث (المحرّض) لحملهن. وكانت الأهلية تشمل أي امرأة لا يقل عمرها عن 13 عامًا،  
129 وتشرع في إجراء عملية إجهاض دوائي جديدة، دون وجود موانع لاستخدام الإجهاض الدوائي [1]، وخلال نطاق العمر الحملي المدعوم من  
130 مجموعة المرافقة - والذي يصل إلى 24 أسبوعًا في الأرجنتين، ويصل إلى 15 أسبوعًا في نيجيريا. [16] وقد استبعدنا أولئك السيدات اللاتي  
131 يعانين من أعراض مستمرة (الزيف أو التشنجات) من محاولة إجهاض سابقة؛ أو اللاتي يعانين من أعراض توحى بوجود حملٍ منتبذ (خارج  
132 الرحم)؛ أو اللاتي لا يرغبن في تواصل طاقم الدراسة معهن أو غير قادرات على ذلك.

133 وقد قدمت جميع المُشاركات موافقة شفوية مستنيرة. قام مجلس المراجعة الاستقصائية في ألبينديل بمراجعة واعتماد هذه  
134 الدراسة متعددة البلدان، كما قام مجلس المراجعة المؤسسية (IRB) في منظمة Fundación Huésped باعتماد البروتوكول المخصص  
135 للأرجنتين. وقد قامت لجنة مستقلة لمراقبة البيانات والإشراف عليها بمراجعة بروتوكولات الدراسة وأدواتها والتحليل المؤقت المُخطط  
136 لأي أحداث تتعلق بالسلامة.

## 137 الإجراءات

138 وفي الأساس، تلقت جميع المُشاركات تعليمات مفصّلة خطوة بخطوة من مستشاري المجموعة المُرافقة بشأن البروتوكول  
139 المناسب الموصي به من منظمة الصحة العالمية للإجهاض الدوائي (الجدول 1) — وذلك استنادًا إلى مدة الحمل (والتي تم تقييمها عن  
140 طريق الموجات فوق الصوتية المكتسبة بصورة مستقلة أو من خلال تاريخ آخر طمث/ دورة شهرية)، [1، 16] والأدوية التي يمكن  
141 لمسؤول الاتصال الوصول إليها.

142 وبعد المشورة بشأن المعلومات الأولية، أجابت المُشاركات عن استبيان أساسي تحت إشراف المستشار المرافق. وبالنسبة  
143 لجميع عمليات جمع البيانات التي جرت لاحقًا، قام منسق الدراسة المدرّب بالاتصال بكل مشاركة في مرحلتين (بعد أسبوع 1 وبعد 3  
144 أسابيع من تعاطي الجرعة الأولى من الدواء) لتقييم الوصول إلى الإجهاض الدوائي واستخدامه، وتوثيق الآثار الجانبية، والجرعات الإضافية  
145 المتناولة، وإتمام الإجهاض، والمضاعفات المحتملة، والسلوك المتعلق بطلب الرعاية الصحية. وقد تقاضت المُشاركات مبلغًا يتراوح بين  
146 10 إلى 25 دولارًا نظير المشاركة في الدراسة. وقد كانت إجراءات الدراسة متسقة بين كلا الموقعين، باستثناء مسألة تأكيد الحمل: حيث  
147 قدم المستشارون في الأرجنتين اختبار حمل عن طريق البول (وهو غير متوافر في نيجيريا) لتأكيد الحمل إلى مجموعة فرعية مختارة  
148 عشوائيًا من المُشاركات.



150 كانت النتيجة الأولية هي فعّالية الإجهاض الدوائي المُسيّر ذاتيًا مع الدعم المرافق، وقد حُسِبَت في صورة نسبة مئوية من  
 151 المستجيبات اللاتي أبلغن بأنفسهن عن إتمام الإجهاض دون تدخل جراحي، وذلك بصورة شاملة وكذلك حسب النظام الدوائي المتّبع.  
 152 وقد أثبتت الأبحاث قدرة الأفراد على إجراء تقييم ذاتي دقيق لإتمام الإجهاض. [21] وكانت النتيجة الثانوية هي تقييم لعدم دونية فعّالية  
 153 الإجهاض الدوائي المُسيّر ذاتيًا عند مقارنتها بفعالية الإجهاض الدوائي الذي يديره الأطباء حسب ما تم قياسه في التجارب السريرية  
 154 التاريخية.

155 أما النتائج الأخرى الخاضعة للقياس فقد تضمنت الحصول على الأدوية واستخدامها، والعوامل التي أثرت على التقييم الذاتي  
 156 لإتمام الإجهاض، والسلوك المتبع فيما يخص طلب الرعاية الصحية، والعلاج الذي تم تلقيه. ولقياس مستوى السلامة ونتائج الأحداث  
 157 العكسية (السلبية)، طلبنا من المشاركون أن يُبلغن ذاتيًا عما إذا كانت لديهن أي من بين تسع نتائج واضحة بخصوص السلامة (النزيف  
 158 الحاد، أو الألم الشديد، أو الإفرازات ذات الرائحة الكريهة، أو الحمى الشديدة، أو تلقي المضادات الحيوية، أو الخضوع للشفط بالتخلية  
 159 (VA) اليدوي أو إجراء توسّع الرحم وكحته (D&C)، أو نقل الدم، أو تلقي سوائل وريدية، أو المبيت بالمرافق الصحية). كما طُلب من  
 160 المشاركون أيضًا أن يُبلغن بأنفسهن عن أي علاجات أخرى. وعلاوة على ذلك، فقد جمعنا بيانات حول عمر المشاركات وتعليمهن والتحقق  
 161 من الحمل والعمر الحملي.

### 163 التحليل الإحصائي

164 لقد كنا نهدف إلى تقدير نسبة المشاركات اللاتي أُجريت عملية إجهاض كاملة دون تدخل جراحي بعد الإجهاض المُسيّر ذاتيًا باستخدام  
 165 المايغبريستون بلاشتراك مع الميزوبروستون، أو الميزوبروستون بمفرده؛ ومن أجل تقييم ما إذا كانت فعّالية الإجهاض الدوائي المُسيّر ذاتيًا  
 166 ليست أدنى من فعّالية الإجهاض الدوائي الذي يديره الأطباء، حسب الوارد في التجارب السريرية التاريخية، في حدود هامش بنسبة  
 167 5% [22-25]

168 وبالنسبة لتحليلاتنا الأولية، فقد حددنا -بشكل مسبق- استبعاد المشاركات اللاتي لا تُعرَف نتائج الإجهاض لديهن، بما يتفق مع  
 169 التجارب السريرية محل المقارنة. [16، 22] قُيِّمَت نسبة المُشاركات في الدراسة اللاتي أُجريت عمليات إجهاض كاملة من خلال الإجابة عن  
 170 سؤالين: «هل تشعرين أن عملية إجهاضك قد اكتملت؟»، بالإضافة إلى السؤال عما إذا كن قد أبلغن عن الخضوع لشفط يدوي بالتخلية  
 171 أو إجراء توسّع وكحت الرحم (D&C). وقد تم تصنيف المُشاركات اللاتي أبلغن عن إتمام الإجهاض لديهن ولكن لم يبلغن عن الخضوع  
 172 لأي تدخل جراحي باعتبار إجهاضهن «مكتمل دون تدخل جراحي»؛ أما المشاركات اللاتي أبلغن عن إتمام الإجهاض لديهن وأبلغن أيضًا

173 عن الخضوع لشغط يدوي بالتخلية أو إجراء توسُّع وكحت الرحم (D&C)، فقد تم تصنيف حالات الإجهاض لديهن باعتبارها «مكتملة  
174 بتدخل جراحي». وبالنسبة للمشاركات اللاتي أبلغن عن عدم إتمام الإجهاض لديهن، أو أفدن بأنهم لسن متأكدات مما إذا كان إجهاضهن  
175 قد اكتمل من عدمه، فقد جرى تصنيف حالات الإجهاض لديهن باعتبارها «غير مكتملة/ غير مؤكدة». ولقد قمنا بحساب جميع النسب  
176 بشكل شامل وبحسب النظام الدوائي وبحسب مدة الحمل (>7 أسابيع، و7-9 أسابيع، و10-12 أسبوعًا، و≤13 أسبوعًا). ونظرًا لتباين  
177 تسجيل المايغريستون في كل بلد وتوخيًا للحرص الشديد بالنيابة عن الشركاء المنفذين، فإننا نمتنع عن الإفصاح عن عدد مستخدمات  
178 النظام حسب البلد. ويتم تمثيل المشاركات من كلا البلدين في كل مجموعة نظام، وبالتالي فقد جمعنا المشاركات عبر البلدان من أجل  
179 حساب النتائج الأولية.

180 وإن إثبات فعالية وسلامة الإجهاض الدوائي المُسرَّ ذاتيًا مقارنةً بالإجهاض الدوائي الذي يديره الأطباء فيم رافق الرعاية السريرية  
181 يمثل فجوة بالغة الأهمية في الأدلة. وبسبب القيود القانونية، فقد كان تعيين ذراع متزامن للإشراف السريري باعتبارها جزءًا من دراسة  
182 الجدوى والفعالية المصاحبة للدراسة أمرًا غير أخلاقي وغير ممكن عمليًا. وهكذا، ولكل سابقة مثبتة [26]، فقد حددنا مسبقًا تجارب  
183 منضبطة معاشة ومنشورة لفعالية الإجهاض الدوائي في أماكن الرعاية السريرية باعتبارها ضوابط تاريخية لتحليل عدم الدونية: اختصت  
184 ثلاث تجارب بدراسة نفس النظام المشترك [23-25]، بينما اختصت تجربة واحدة بدراسة نفس النظام القائم على الميزوبروستول  
185 بمفرده [22]. كانت هذه هي التجارب الوحيدة التي تم تحديدها التي كان النظام المستخدم فيها مطابقًا للأنظمة الموصي بها من قبل  
186 مجموعات المراقبة، ومُستشهد بها جميعًا على نطاق واسع في توجيهات الإجهاض الآمن ذات الصلة [1] لا يُقصد من الضوابط التاريخية  
187 أن تكون بديلاً للاختيار العشوائي (التعشية)؛ ومع ذلك، ولتقييم قابلية المقارنة، أجرينا اختبارات للوقوف على الاختلافات في عمر  
188 المشاركة ومدة الحمل في دراسة الجدوى والفعالية المصاحبة للدراسة الخاضعة للمقارنة مع الضوابط التاريخية باستخدام اختبارات  
189 (تي) (T-Tests) واختبارات التناسب. وقد استخلصنا البيانات المتعلقة بإتمام الإجهاض من النتائج المنشورة للضوابط التاريخية.

190 وقد أجرينا اختبارين لعدم الدونية: أحدهما بين مستخدماتٍ لنظام الميزوبروستول بمفرده، والآخر بين مستخدماتٍ للنظام  
191 المزدوج. وقد قيدنا عينة دراسة الجدوى والفعالية المصاحبة للدراسة على المشاركات اللاتي تقل أعمار حملهن عن 9 أسابيع للتوافق مع  
192 معايير الأهلية لدراسات المقارنة. وقد نُشرَت التفاصيل الكاملة لتحليل عدم الدونية مسبقًا [16] وترد بالتفصيل في الملحق (6).

193 وقد حُلِّت البيانات باستخدام الإصدار 15.1 من برنامج STATA الإحصائي. وكان الحد الأدنى المستهدف لحجم العينة هو  
194 213 للنظام المزدوج، و419 لنظام الميزوبروستول بمفرده للاختبار أحادي الجانب من أجل تقييم ما إذا كان الإجهاض الدوائي المُسرَّ  
195 ذاتيًا مع دعم المرافقة لا تقل فعَّاليته عن مرافق الرعاية السريرية بنسبة تتجاوز 5% لكل نظام دوائي نظام بقوة 80% وخطأً من النوع

196 الأول (ألفا) بنسبة 5٪ ولا يوجد ارتباط بين المستشارين (بناءً على نتائج الدراسة التجريبية). [18] هذه الدراسة مسجلة في سجل ISRCTN  
197 تحت رقم ISRCTN95769543.

198 دور مصدر التمويل

199 لم يكن لممولي الدراسة أي دور في تصميم الدراسة أو جمع البيانات أو التحليل أو التفسير أو كتابة التقرير.

200

201 النتائج

202 في الفترة بين 31 يوليو 2019 و27 أبريل 2020، قام مسؤولو التعيين في الدراسة بفحص 1237 ضيفة للتحقق من أهليتهن (الشكل 1).

203 كان 118 (10٪) منهن غير مؤهلات بسبب احتياجاتهن إلى دعم لا علاقة له بالإجهاد، أو لأنهن قد بدأت بالفعل إجراءات الإجهاد

204 الدوائي، أو يعانين من أعراض ناشئة عن سقوط أو إجهاد مستمر. ومن بين الحالات الـ 1119 المؤهلة، أعطت 1051 حالة (94٪)

205 الموافقة على المشاركة، وأكملن أسئلة خط الأساس الإحصائي، وتم تسجيلهن في الدراسة (العدد=401 من الأرجنتين، العدد=650 من

206 نيجيريا). وقد أكملت 961 حالة (91٪)، من أصل 1051 مشاركة مسجلة، اتصالاً واحدًا على الأقل للمتابعة، وأبلغن عما إذا كن قد

207 حصلن على الأدوية وتناولنها أم لا. ومن بين أولئك اللاتي أجرين اتصال متابعة واحد على الأقل، أكملت 929 حالة (97٪) من أصل 961

208 حالة استطلاع الأسبوع الأول وأكملت 846 (88٪) استطلاع الأسبوع الثالث. لم تُكمل 90 حالة (9٪)، من أصل 1051 مشاركة، متابعة

209 الدراسة بعد خط الأساس؛ تم الوصول إلى 47 حالة (4٪) فيما بعد للتأكد من النتائج الأولية و43 حالة (4٪) كانت نتائجها غير معروفة.

210 وقد تراوحت أعمار المشاركات بين 14 و50 عامًا، وتراوحت أعمار معظمهن بين 20 و29 عامًا (الجدول 2). كانت محال إقامة

211 المشاركات الأرجنتينيات بين ثلاث مقاطعات (نيوكوين وريو نيغرو وسالتا). بينما كانت المشاركات النيجيريات يُقمن في 28 ولاية (وكانت

212 الأكثر شيوعًا هي لاغوس وإيمو وأبيا). تأكدت معظم المشاركات من حملهن من خلال اختبارات حمل منزلية. من بين عينة عشوائية من

213 المشاركات اللاتي خضعن لاختبارات الحمل المنزلية عند خط الأساس، كانت نتيجة اختبارين اثنين (2٪)، من أصل 102 اختبارًا، سلبيتين.

214 وقد أبلغت المشاركات عن حالات حمل تتراوح أعمارها بين 4 أسابيع و22 أسبوعًا من بدء الحمل عند خط أساس هذه الدراسة. وكانت

215 أعمار معظم حالات الحمل تقل عن 12 أسبوعًا منذ بدء الحمل.

216 وفي المتابعة المقررة عند الأسبوع الأول، حصلت 922 مشاركة على الأدوية، وقامت 919 مشاركة منهن بتناول الأدوية، بما في

217 ذلك أولئك اللاتي تلقين أدوية غير معروفة (الملحق 6). أبلغت ثلاث مشاركات عن حصولهن على حبوب دون تناولها لأنهن قررن مواصلة

218 الحمل (ثلاث مشاركات [بنسبة >1%]). بالنسبة لخدمات النظام المزدوج ، أبلغت جميع المشاركات عن تناول المايغريستون أولاً،  
219 وأتبعه معظمهن بأربع حبات من الميزوبروستول (356/349، 98.0%)، وقد تم تناولها تحت اللسان (356/274، 77.0%؛ الملحق 6).  
220 أبلغت ثلاث مشاركات (1%) عن تناولهن لجرعة ثانية مؤلفة من قرص واحد من المايغريستون قبل الاستمرار في تناول الميزوبروستول—  
221 وكانت أولئك المشاركات الثلاث في فترات لاحقة من الحمل (16 و17 و19 أسبوعًا). وبالنسبة لخدمات نظام الميزوبروستول بمفرده،  
222 تناولت معظم المشاركات أربع حبات في جميع الجرعات الثلاث، وكانت جميعها تقريبًا تحت اللسان. تم تمثيل المشاركات من كلا البلدين  
223 في كل مجموعة مخصصة لكل نظام على حدة؛ ومع ذلك، كانت تقييم معظم مستخدمات النظام المشترك في الأرجنتين، بينما كانت تقييم  
224 معظم مستخدمات نظام الميزوبروستول بمفرده في نيجيريا.

225 وبعد حوالي أسبوع من تناول الحبوب، قامت 868 حالة (94%) من أصل 919 مشاركة ممن تناولن حبوب منع الحمل وأكملن  
226 المتابعة عند مرور أسبوع واحد بالإبلاغ عن حدوث إجهاض كامل دون تدخل جراحي (300 حالة [92%] من أصل 325 مُستخدمة للنظام  
227 المشترك، و566 حالة [96%] من مستخدمات الميزوبروستول بمفرده) بينما أفادت عشرة مشاركات إضافيات (1%) عن حدوث إجهاض  
228 كامل بتدخل جراحي (الجدول 3). وفي آخر متابعة بالدراسة، أبلغت 922 حالة (97%)، من أصل 951 مشاركة، عن إتمام الإجهاض دون  
229 تدخل جراحي، بينما أبلغت 17 حالة (2%) عن إتمام الإجهاض بتدخل جراحي. وكانت نسبة إتمام الإجهاض مرتفعة بين كلا النظامين  
230 الدوائيين. وبين مستخدمات النظام المشترك، زادت معدلات حدوث التدخل الجراحي لإتمام الإجهاض كلما تقدمت مدة الحمل.

231 وقد وصل منسقاو الدراسة إلى 47 حالة (52%) من أصل 90 مشاركة ممن انقطعت المتابعة معهن بعد فترة الدراسة لتسجيل  
232 النتيجة الأساسية—وأفادت 39 حالة منهن بأن الإجهاض قد اكتمل دون تدخل جراحي. وبمقتضى الافتراض الحذر بأن المشاركات الـ 43  
233 (48%) المتبقيات، ممن تعذر الوصول إليهن بعد خط الأساس، لم يحدث لديهن إجهاض كامل، فإن إجمالي إتمام الإجهاض في المتابعة  
234 الأخيرة سينخفض إلى 961 حالة (91%) من أصل 1051 مشاركة دون تدخل جراحي. وبعد إدراج التدخلات الجراحية وحالات الإسقاط  
235 العفوي للجنين بين أولئك اللائي انقطعت المتابعة معهن، فهناك 987 (94%) من المشاركات حوامل في نهاية المتابعة.

236 من بين المشاركات اللاتي أبلغن عن إتمام إجهاض حملهن، استشهدت جميعهن تقريبًا بأكثر من عامل واحد قد أثر على تقييمهن  
237 لإتمام الإجهاض، ومن بينهن 367 حالة (39%) قد أبلغن عن إجراء شكل من أشكال تأكيد إتمام الإجهاض من قبل الرعاية السريرية  
238 (الملحق 6).

239 وأثناء متابعة الدراسة، سعت 192 حالة (20%) من أصل 951 مشاركة للحصول على الرعاية الصحية من مستشفى أو عيادة  
240 (120 حالة [34%] من مستخدمات النظام المزدوج ، و71 حالة [12%] من مستخدمات الميزوبروستول بمفرده، وحالة واحدة [8%]

241 تستخدم نظامًا غير معروف للإجهاد الدوائي (الملحق 6). من بين المشاركات اللاتي طلبن تلقي الرعاية، فقد فعلت أغليبتهن ذلك لتأكيد  
242 إتمام الإجهاد (157 حالة [82%] من 192 مشاركة). وقد قامت 21 حالة [11%] من أصل 192 مشاركة بطلب الرعاية بسبب مخاوف  
243 تتعلق بالألم أو النزيف أو الإفرازات أو الحمى. وأبلغت المشاركات في أغلب الأحيان عن تلقي العلاجات التالية: التصوير بتخطيط الصدى  
244 (80 حالة [8%] من 951 مشاركة)، ومسكنات للألم (25 مشاركة [3%])، وتلقي سوائل وريدية (19 مشاركة [2%])، ومضادات حيوية  
245 (16 مشاركة [2%]). وقد أفادت 17 حالة (2%) من المشاركات أنهن قد خضعن لإجراء شفط يدوي بالتخلية أو إجراء توسع وكحت  
246 الرحم (D&C)، وأفادت 12 حالة (1%) أنهن مكثن طوال الليل في منشأة طبية (وجميعهن ممن خضعن لإجراء شفط يدوي بالتخلية أو  
247 توسع وكحت الرحم)، وأبلغت 6 حالات (1%) عن تلقيهن لنقل دم. وكانت المشاركات في الأرجنتين أكثر عرضة للخضوع لشفط يدوي  
248 بالتخلية مقارنة بالمشاركات من نيجيريا (فرق المخاطر = 9.2؛ فترة الثقة (CI) بنسبة 95%: 3.4-15.0؛ القيمة الاحتمالية (p=0.0013)).  
249 أبلغت 782 حالة (82%) من أصل 951 مشاركة عن عدم رصد أي علامات تحذيرية محتملة لحدوث مضاعفات، وأفادت 84 حالة  
250 (9%) عن حدوث نزيف قد استهلك أكثر من فوطتين اثنتين في الساعة واستمر لأكثر من ساعتين، وأفادت 80 حالة (8%) بوجود رائحة  
251 كريهة أو إفرازات ملونة، وأفادت 50 حالة (5%) بوجود ألم يعيق الأنشطة العادية، بينما أفادت 16 حالة (2%) بارتفاع درجة الحرارة عن  
252 38 درجة مئوية لأكثر من 24 ساعة.

253 بالنسبة لتحليل عدم الدونية، كانت 1,463 حالة مشاركة قابلة للتقييم في دراسات المقارنة الخاضعة للضوابط التاريخية  
254 الأربعة لديهن حالات حمل تقل عن 9 أسابيع منذ بدء الحمل، وكان يعشن في واحدة من بين 11 دولة (أرمينيا والصين وكوبا وجورجيا  
255 والهند ومنغوليا ورومانيا وسلوفينيا والسويد وتايلاند وفيتنام)، وقد تم اختيارهن عشوائيًا لنفس نظام الإجهاد الدوائي الذي تمت دراسته  
256 في دراسة الجدوى والفعالية المصاحبة للدراسة (951) (SAFE) حالة للنظام المزدوج و512 حالة للميزوبروستول بمفرده)، وخضعن  
257 للمقارنة مع 779 حالة مشاركة في دراسة الجدوى والفعالية المصاحبة للدراسة ممن لديهن حالات حمل أقل من 9 أسابيع (275 حالة  
258 بالنظام المزدوج، و504 حالة بنظام الميزوبروستول بمفرده). ووفقًا للنظام الدوائي، كانت المشاركات في دراسة الجدوى والفعالية  
259 المصاحبة للدراسة (SAFE) والدراسات ذات الضوابط التاريخية مُتشابهات، على الرغم من أن المشاركات في دراسة الجدوى والفعالية  
260 المصاحبة للدراسة (SAFE) كانت أعمارهن أكبر قليلًا (بمتوسط عام واحد إلى 4 أعوام)، وكانت تواريخ حملهن أبكر قليلًا (حوالي أسبوع  
261 واحد في المتوسط؛ الملحق 6).

262 ومن بين مستخدمات النظام المشترك، كان إتمام الإجهاد بين المشاركات في دراسة الجدوى والفعالية المصاحبة للدراسة  
263 (SAFE)، اللاتي تقل أعمار حملهن عن 9 أسابيع، بنسبة 96% (265 من 275 حالة مشاركة)، مقارنة بمستوى الإتمام المجمع الذي بلغ  
264 نسبة 94% (898 من 951 حالة مشاركة) بين مجموعات الضوابط التاريخية الثلاث (فرق المخاطر = 1.9-، فترة الثقة (CI) بنسبة

265 95% :- 4.6 إلى 0.7%؛ الشكل (2) والملحق (6)[25-23]. من بين مُستخدمات الميزوبروستول بمفرده، فإن إتمام الإجهاض بين  
266 المشاركات في دراسة الجدوى والفعّالية المصاحبة للدراسة (SAFE)، ممن تقل أعمار حملهن عن 9 أسابيع، كانت نسبته 99.0% (499)  
267 من أصل 504 حالة مشاركة)، مقارنةً بنسبة 84% (431 من 512 حالة مشاركة) تم الإبلاغ عنها في مجموعة الضوابط التاريخية المتطابقة  
268 الفردية (فرق المخاطر = 14.8%، فترة الثقة (CI) بنسبة 95% :- 18.1 إلى 11.6%؛ الشكل (2) والملحق (6)).[22] نظرًا لأن الحدود  
269 العليا لفرات الثقة بنسبة 95% لفرق المخاطر بين الإجهاض المُسيّر ذاتيًا والإجهاض الذي يديره الأطباء لكلا النظامين تكون أقل من  
270 هامش عدم الدونية المُحدد والذي يبلغ 5%، فإننا نرفض الفرضية الصفرية للدونية.

## 271 المناقشة

272 تُظهر نتائجنا أن الإجهاض الدوائي المُسيّر ذاتيًا من خلال دعم مجموعة مرافقة يعتبر فعّالًا للغاية، وأن فعّاليته -بالنسبة لمن لم يُكمل  
273 حملهن مدة 9 أسابيع- لا تقل عن مستوى فعّالية الإجهاض الدوائي الذي يُدار على يد الأطباء في أماكن الرعاية السريرية. وعلى مدار 4  
274 أسابيع تقريبًا من المتابعة، حصلت معظم المشاركات على الأدوية، وتناولنها وفقًا للبروتوكولات المستندة إلى منظمة الصحة العالمية،  
275 وأتممن إجهاض حملهن؛ سعى عدد صغير من المشاركات للحصول على الرعاية الصحية في العيادات أو المستشفيات، وكان ذلك -في  
276 المقام الأول- بغرض تأكيد إتمام الإجهاض.

277 تساهم نتائجنا في قاعدة متنامية من الأدلة المتعلقة بفعّالية وسلامة الإجهاض المُسيّر ذاتيًا باستخدام الأدوية، مع تلقي دعم  
278 المرافقة ودون تلقيه. [11, 14-16] وعند النظر لهذه النتائج مُجمعةً، نجد لها العديد من الآثار العامة. أولاً، تمثل نتائج دراسة الجدوى  
279 والفعّالية المصاحبة للدراسة (SAFE) إضافةً بالنسبة إلى مجموعة الأدلة القوية التي تثبت أن الإجهاض الدوائي يعتبر فعّالاً عبر مجموعة  
280 من نماذج تقديم الخدمات في كل من أماكن الرعاية السريرية وغير السريرية. وقد ثبتت سلامة وفعّالية الإجهاض الدوائي عبر مجموعة من  
281 ترتيبات الرعاية المدعومة بالعاملين بالمجال الصحي بما يتضمن أماكن الرعاية السريرية التقليدية [3, 22-25] وإجراء مكالمات الفيديو  
282 مع أحد الأطباء [27] والترتيبات المُسيّرة ذاتيًا مع دعم صيدلي [15]. تُظهر هذه النتائج أن الإجهاض الدوائي يكون فعّالاً أيضًا حين يُسيّر  
283 (يُدار) ذاتيًا في المنزل مع الحصول على معلومات مقدمة من مستشاري الإجهاض غير المدربين على الرعاية السريرية.

284 وعلاوة على ذلك، تُشير نتائج دراسة الجدوى والفعّالية المصاحبة للدراسة (SAFE) إلى أن الإجهاض الدوائي المُسيّر ذاتيًا  
285 والمسنود بدعم مصاحب يعتبر إجهاضًا آمنًا، وأن بإمكان مستشاري الإجهاض غير المدربين على الرعاية السريرية أن يدعموا الأفراد في  
286 فهم متى وكيف يحصلن على الرعاية إذا كن بحاجة إليها أو يرغبون في تلقيها أثناء الإجهاض المُسيّر ذاتيًا. وإن الاختلافات الملحوظة في  
287 الشفط اليدوي بالتخلية حسب كل بلد قد تُعزى إلى الاختلافات القائمة في إمكانية الوصول إلى هذه الخدمة حسب البلد، بالإضافة إلى

288 الاختلافات القائمة في علاقات مجموعات المرافقة لمقدمي الرعاية الصحية الموثوق بهم. وعلى الرغم من أننا لا نستطيع التأكد من أن  
289 كل حالة، من الحالات التي يُحتمل أن تكون قد رغبت في طلب الرعاية الصحية، قد فعلت ذلك، إلا أن بياناتنا تشير إلى أن الحالات كن  
290 قدرات على الوصول إلى الرعاية عند الحاجة إليها. من منظور القياس، تطعن هذه النتائج في الفكرة القائلة بأن أي زيارة لمنشأة صحيّة  
291 أثناء الإجهاض المُسيّر ذاتيًا أو بعده يجبُ قياسها باعتبارها مضاعفاتٍ للإجهاض؛ أما من منظور تقديم الرعاية، فيجب أن تشجع الأنظمة  
292 الصحية على إعادة النظر في أفضل طريقة لدعم النساء اللاتي يقمن بإدارة حالاتهن ذاتيًا بأنفسهن.

293 ومن الجدير بالذكر أن فعالية الميزوبروستول بمفرده في دراسة الجدوى والفعالية المصاحبة للدراسة (SAFE) أعلى من الفعالية  
294 المبلغ عنها في التجارب السريرية. [6] ومع ذلك، تتوافق نتائج هذه الدراسة مع مستويات الفعالية المتروحة بين 92.6 - 96.4٪ الواردة  
295 في الدراسات الحديثة للإجهاض المُسيّر ذاتيًا باستخدام الميزوبروستول بمفرده. [14, 15, 18] وإن فعالية الميزوبروستول بمفرده، والتي  
296 شوهدت في الدراسات المستخلصة من السياقات المُسيّرة ذاتيًا، والتي تكون فعالية أكبر عند مقارنتها بفعالية الميزوبروستول بمفرده في  
297 البيئات السريرية، يُمكن أن تُعزى إلى العوامل التالية: أولاً، اضطلعت دراسات الإجهاض الدوائي المُسيّر ذاتيًا بتقييم إتمام الإجهاض خلال  
298 فترة زمنية تتراوح بين 3 و4 أسابيع، مقارنة بفترة زمنية أقصر (من أسبوع إلى أسبوعين) في التجارب السريرية. [28] وعلاوة على ذلك، في  
299 التجارب السريرية، فإن الحالات المُشاركة، اللاتي لا يزال إجهاضهن قيد التنفيذ أو يعانين من عدم إتمام الإجهاض أو فواته أو فشله وقت  
300 تقييم النتائج، تتم توصيتهن عادة بالتدخل الجراحي (مثل [22]) أما الحالات المُشاركة في السياقات المُسيّرة ذاتيًا فمن الأرجح أن يتلقين  
301 المشورة فيما يخص أسلوب الإدارة المتوقع أو أن يتلقين بالمشورة بتناول جرعات إضافية من الميزوبروستول- وفقًا لتوجيهات منظمة  
302 الصحة العالمية [1]— قبل اللجوء إلى رعاية طبيّة إضافية. [28] وأخيرًا، ففي كل من دراسة الجدوى والفعالية المصاحبة للدراسة (SAFE)  
303 والدراسات الأخرى من خارج أماكن الرعاية السريرية، كان بإمكان المُشاركات في الدراسة الوصول -عند الطلب- إلى مستشاري الإجهاض  
304 المتاحين باعتبارهم موردًا لطرح الأسئلة حول نطاق النزيف الطبيعي والآثار الجانبية، وكذلك للإحالة إلى طلب الرعاية في حالة حدوث  
305 مضاعفات محتملة. وقد ثبت أن هذا النوع من التواصل المنتظم الداعم يُساعد عمليات الإجهاض على الشعور بجاهزية أكبر لخوض  
306 تجربة الإجهاض الخاصة بهن، [29] ومن المحتمل أن يكون قد ساعد في تحسين فهم عملية الإجهاض الدوائي وتحسين القدرة على  
307 السماح لهذه العملية بأن تأخذ مجراها السليم. بالنظر إلى الفعالية العالية لأنظمة الميزوبروستول بمفرده التي تم الإبلاغ عنها في سياقات  
308 الإجهاض المُسيّر ذاتيًا مقارنة بسياقات الرعاية السريرية، فهناك ما يبرر إجراء أبحاث إضافية لاستكشاف كيف يمكن أن تؤدي  
309 البروتوكولات المعدلة والارتقاء بمستوى المشورة والدعم لعمليات الإجهاض في البيئات السريرية إلى زيادة فعالية أنظمة استخدام  
310 الميزوبروستول بمفرده.

311 وإن إجراء دراسة استطلاعية بين النساء اللاتي يسيّرن حالات الإجهاض ذاتيًا (بأنفسهن) في سياقات تقييدية يطرح بعض  
312 الصعوبات. والجدير بالذكر أن تصميم الدراسة قد اعتمد على الإبلاغ الذاتي عن عمر الحمل ونتائج الإجهاض؛ بينما تم تأكيد النتائج عادةً  
313 عن طريق الموجات فوق الصوتية في الدراسات السريرية. ومع ذلك، فإن الأساس المعرفي للاعتماد على الإبلاغ الذاتي عن سمات الأهلية  
314 والنتائج يستند على البحث الذي أثبت دقة الإبلاغ عن آخر دورة شهرية مقارنة بالتقييم عبر الموجات فوق الصوتية، [30] فضلًا عن  
315 فعالية وسلامة الإجهاض الدوائي بدون فحص بالموجات فوق الصوتية. [31] وفي الواقع، لا تتطلب التوجيهات الفنية لمنظمة الصحة  
316 العالمية تأكيدًا بالموجات فوق الصوتية للعمر الحملي بالنسبة للإجهاض الدوائي المُبكر. [1] علاوة على ذلك، فقد أظهرت الدراسات  
317 المُنجزة في مجموعة من الأماكن موثوقية الإبلاغ الذاتي عن إتمام الإجهاض. [21] وأخيرًا، فنظرًا للقيود القانونية للإجهاض في كلا الموقعين،  
318 كان من غير الممكن توظيف ذراع للإشراف السريري المتزامن. ولذلك فقد اعتمدنا على الاستعارة من التجارب السريرية التاريخية التي  
319 درست نفس أنظمة الأدوية في نفس نطاق العمر الحملي [22-25]- وهو نهج تحليلي له سابقة قوية. [26] على الرغم من أننا لاحظنا  
320 اختلافات طفيفة في سمتين أساسيتين بين أتراب دراسة الجدوى والفعّالية المصاحبة للدراسة (SAFE) والضوابط التاريخية، وبناء على  
321 الأدبيات الحالية والتحليل التجميحي لفعّالية النظام عند أعمار حمل متباينة، فإننا لن نتوقع أن يؤدي تباين الحمل لعدة أيام تقل عن 9  
322 أسابيع ولا أن يؤدي التفاوت في أعمار المشاركات بين عام واحد وحتى 4 أعوام إلى إحداث اختلافات كبيرة في إتمام الإجهاض. [32] وقد  
323 شهدت هذه الدراسة أيضًا تناقصًا في أعداد الحالات المُشاركة - إذ لم يُمكن الوصول إلى 4% من المشاركات بعد خط الأساس. ولتسجيل  
324 هذا التناقص، فقد قدرنا الفعّالية بحذر مفترضين فشل الإجهاض لدى جميع الحالات المشاركة اللاتي انقطعت المتابعة معهن. ومع  
325 ذلك، قد يكون التأثير الحقيقي للمصادر المحتملة للانحياز أقل بكثير، ويمكن للتحليلات المستقبلية أن تُحدد ذلك كمّيًا. وأخيرًا، لم تُصمّم  
326 هذه الدراسة النظام العلاجي المزدوج مع نظام الميزوبروستول بمفرده، وإنما لتقييم الفعّالية الفردية لكل نظام في سياق التسيير الذاتي  
327 مقارنةً بالأدبيات المنشورة حول الإجهاض الدوائي في أماكن الرعاية السريرية. ولذلك فإننا نحذر القراء من عقد مقارنات بين النتائج المبلغ  
328 عنها في مجموعة النظام المشترك مقابل مجموعة الميزوبروستول بمفرده في دراسة الجدوى والفعّالية المصاحبة للدراسة (SAFE).  
329 ويتحقق التوازن بين هذه التقييدات من خلال الطبيعة الفريدة لعينة الدراسة التي مكنتنا من المتابعة الاستطلاعية للمشاركات اللاتي كنّ  
330 يسيّرن إجهاضهن ذاتيًا عبر سياقين مختلفين، العينة الكبيرة المدعومة بشكل كافٍ، والانقطاع المنخفض للمتابعة.

331 وفي الختام، يعتبر الإجهاض الدوائي المُسيّر ذاتيًا المصحوب بدعم مرافق إجراءً فعّالًا وآمنًا للغاية. للمضي قدمًا، يجب على  
332 الحكومات والهيئات المهنية والأطباء الاعتماد على الأدلة لتوجيه سياساتهم وممارساتهم نحو الأساليب المُسيّرة ذاتيًا للإجهاض الدوائي،  
333 والتركيز على توسيع الوصول إلى الإجهاض الدوائي عبر مجموعة من نماذج تقديم الخدمات - بما في ذلك الاستخدام الذاتي.

334



## بيان بإسهامات المؤلفين

335  
336 ساهم المؤلفون، المختصرة أسماؤهم بالأحرف الأولى، التاليين: BG وCG وHM وIAK وIE وRJ وRM وRZ وSN في صياغة المفاهيم  
337 التصويرية للدراسة الكمية وتصميمها، بينما قام كل من CB وHM وRJ وRM وSC بجمع البيانات والجودة، وأجرت HM وRJ التحليلات  
338 الكمية. وقد قادت HM كتابة هذه النص، بإسهام وتنقيح وموافقة من جميع المؤلفين. وقد اطلع جميع المؤلفين على النص النهائي  
339 ووافقوا عليه. وقد تمكن جميع المؤلفين من الوصول إلى جميع البيانات الموجودة في الدراسة، واضطلعت مؤلفتان (HM وRJ)  
340 بالوصول إلى البيانات والتحقق منها. تتحمل كلٌّ من CG وHM وRJ مسؤولية قرار تقديم النص.

## إقرار بشأن المصالح

341  
342 نقر بعدم وجود تضارب في المصالح.

## مشاركة البيانات

343  
344 يُتاح بروتوكول الدراسة وخطة التحليل والأدوات أمام المجتمع العلمي عبر الإنترنت  
345 (<https://bmjopen.bmj.com/content/10/11/e036800>). ويجب تقديم جميع طلبات البيانات إلى الباحثة الرئيسية عبر البريد  
346 الإلكتروني: البريد الإلكتروني ([hmoseson@ibisreproductivehealth.org](mailto:hmoseson@ibisreproductivehealth.org)) للبت فيها. وقد تُمنح صلاحية الوصول إلى البيانات  
347 مُجهولة الهوية بعد المراجعة والموافقة على مذكرة مفاهيمية بدأتها الباحثة وذلك من قبل الباحثة الرئيسية ولجنة مراقبة البيانات  
348 والإشراف عليها وبعد توقيع الباحثة على اتفاقية الوصول إلى البيانات.

## شكر وتقدير

349  
350 مُؤلت هذه الدراسة بمنحةٍ مُقدمة من مؤسسة ديفيد ولوسيل باكارد (David and Lucile Packard Foundation) إلى CG وHM  
351 وRJ. كما تتلقى HM أيضًا دعمًا من خلال منحة المعهد القومي للصحة (1R21CA256759-01). ونحن نُعرب عن امتناننا للسيدات  
352 المشاركات في الدراسة على مشاركة المعلومات المتعلقة بحالات الإجهاض المُسيّر ذاتيًا لديهن مع فريق الدراسة. كما نتوجّه بالشكر إلى  
353 La Sofia Filippa وIlana Dzuba وBrianna Keefe-Oates وMaria Yasinta والفريق المتواجد لدى La Revuelta  
354 وذلك على مساهماتهم الهائلة بمختلف أشكالها في هذا العمل.

- 355
- 356 .1 WHO. Medical Management of Abortion Geneva, Switzerland: World Health Organization; 2018  
 357 [-https://apps.who.int/iris/bitstream/handle/10665/278968/9789241550406](https://apps.who.int/iris/bitstream/handle/10665/278968/9789241550406) :Available from]  
 358 [.eng.pdf?ua=1](#)
- 359 .2 Rodriguez MI, Seuc A, Kapp N, von Hertzen H, Huong NT, Wojdyla D, et al. Acceptability of  
 360 ,only medical termination of pregnancy compared with vacuum aspiration: an international-misoprostol  
 361 .x.0528.2012.03310-DOI: 10.1111/j.1471 .23-multicentre trial. BJOG. 2012;119(7):817
- 362 .3 Winikoff B, Sivin I, Coyaji KJ, Cabezas E, Bilian X, Sujuan G, et al. Safety, efficacy, and acceptability  
 363 misoprostol versus -of medical abortion in China, Cuba, and India: A comparative trial of mifepristone  
 364 .8-70511(97)9378-DOI: 10.1016/s0002 .7-surgical abortion. Am J Obstet Gynecol. 1997;176(2):431
- 365 .4 Kulier R, Kapp N, Gulmezoglu AM, Hofmeyr GJ, Cheng L, Campana A. Medical methods for first  
 366 Database Syst Rev. 2011(11):CD002855. DOI: trimester abortion. Cochrane  
 367 .CD002855.pub4.14651858/10.1002
- 368 .5 Chen MJ, Creinin MD. Mifepristone With Buccal Misoprostol for Medical Abortion: A Systematic  
 369 .DOI: 10.1097/AOG.0000000000000897 .21-Review. Obstet Gynecol. 2015;126(1):12
- 370 .6 Trimester Medical-Raymond EG, Harrison MS, Weaver MA. Efficacy of Misoprostol Alone for First  
 371 DOI: .47-Abortion: A Systematic Review. Obstet Gynecol. 2019;133(1):137  
 372 .AOG.0000000000003017/10.1097
- 373 .7 Kapp N, Eckersberger E, Lavelanet A, Rodriguez MI. Medical abortion in the late first trimester: a  
 374 .DOI: 10.1016/j.contraception.2018.11.002 .86-systematic review. Contraception. 2019;99(2):77
- 375 .8 Ferguson I, Scott H. Systematic Review of the Effectiveness, Safety, and Acceptability of  
 376 Income Countries. J Obstet -and Middle -Mifepristone and Misoprostol for Medical Abortion in Low  
 377 .e2. DOI: 10.1016/j.jogc.2020.04.006 42-Gynaecol Can. 2020;42(12):1532
- 378 .9 Rocca CH, Puri M, Shrestha P, Blum M, Maharjan D, Grossman D, et al. Effectiveness and safety  
 379 inferiority study -midwives: A non-of early medication abortion provided in pharmacies by auxiliary nurse  
 380 .in Nepal. PLoS One. 2018;13(1):e0191174. DOI: 10.1371/journal.pone.0191174
- 381 .10 and sexual—Starrs AM, Ezeh AC, Barker G, Basu A, Bertrand JT, Blum R, et al. Accelerate progress  
 382 Lancet Commission. The Lancet. —reproductive health and rights for all: report of the Guttmacher  
 383 .9-30293(18)6736-DOI: 10.1016/s0140 .92-2642:(10140)391;2018
- 384 .11 managed abortion: A-Walker J, Baum SE, Gerds C. Self-Moseson H, Herold S, Filippa S, Barr  
 385 systematic scoping review. Best Practice & Research Clinical Obstetrics & Gynaecology. 2019. DOI:  
 386 .j.bpobgyn.2019.08.002/10.1016
- 387 .12 Ganatra B, Gerds C, Rossier C, Johnson Jr B, Tuncalp O, Assifi A, et al. Global, regional, and  
 388 estimates from a Bayesian hierarchical model. :14-subregional classification of abortions by safety, 2010  
 389 [.4-31794\(17\)6736-http://dx.doi.org/10.1016/S0140](#) :DOI .81-Lancet. 2017;390:2372
- 390 .13 -medicatlization, and Community-Movements: Criminalization, De Braine N. Autonomous Health  
 391 .DOI .97-Based Direct Action. Health Hum Rights. 2020;22(2):85

392 .14 based distribution of misoprostol for early -Foster AM, Arnott G, Hobstetter M. Community  
393 .7-abortion: evaluation of a program along the Thailand Burma border. *Contraception*. 2017;96(4):242  
394 .DOI: 10.1016/j.contraception.2017.06.006

395 .15 reported -s self'Stillman M, Owolabi O, Akinyemi A, Moore A, Bankole A, Fatusi A, et al. Women  
396 experiences using misoprostol obtained from drug sellers: a prospective cohort study in Lagos State,  
397 .Nigeria. *BMJ Open*. 2020(IN PRESS). DOI

398 .16 Oates B, Jayaweera RT, Filippa S, Motana R, Bercu C, et al. Studying -Moseson H, Keefe  
399 for a prospective Accompaniment model Feasibility and Effectiveness (SAFE) Study: study protocol  
400 managed medication abortion. *BMJ Open*. -observational cohort study of the effectiveness of self  
401 .036800-2020-e036800. DOI: 10.1136/bmjopen:(11)10;2020

402 .17 Managed-Self Ralph L, Foster DG, Raifman S, Biggs MA, Samari G, Upadhyay U, et al. Prevalence of  
403 Abortion Among Women of Reproductive Age in the United States. *JAMA Netw Open*.  
404 .e2029245. DOI: 10.1001/jamanetworkopen.2020.29245:(12)3;2020

405 .18 managed -Oates B, Filippa S, Motana R, et al. Self-Moseson H, Jayaweera R, Raifman S, Keefe  
406 medication abortion outcomes: results from a prospective pilot study. *Reprod Health*. 2020;17(1):164.  
407 .4-01016-020-DOI: 10.1186/s12978

408 .19 Okorie PC, Abayomi OA. Abortion laws in Nigeria: A Case for Reform. *Annual Survey of*  
409 .DOI .92-165:(1)23;International and Comparative Law. 2019

410 .20 .(1984) ,Código Penal de la Nación Argentina

411 .21 up strategies to confirm the success of -Hansen M, Cameron S, Lohr PA, Hasler E. Follow-Schmidt  
412 analyses. *Am -medical abortion of pregnancies up to 10 weeks' gestation: A systematic review with meta*  
413 *J Obstet Gynecol*. 2019. DOI: 10.1016/j.ajog.2019.11.1244

414 .22 von Hertzen H, Piaggio G, Huong NTM, Arustamyan K, Cabezas E, Gomez M, et al. Efficacy of two  
415 intervals and two routes of administration of misoprostol for termination of early pregnancy: a  
416 -DOI: 10.1016/s0140 .46-randomised controlled equivalence trial. *The Lancet*. 2007;369(9577):1938  
417 .3-60914(07)6736

418 .23 von Hertzen H, Huong NT, Piaggio G, Bayalag M, Cabezas E, Fang AH, et al. Misoprostol dose and  
419 medical abortion: a randomised controlled noninferiority trial. *BJOG*. route after mifepristone for early  
420 .x.0528.2010.02636-DOI: 10.1111/j.1471 .96-1186:(10)117;2010

421 .24 controlled trial on -Tang OS, Chan CC, Ng EH, Lee SW, Ho PC. A prospective, randomized, placebo  
422 the use of mifepristone with sublingual or vaginal misoprostol for medical abortions of less than 9 weeks  
423 .DOI: 10.1093/humrep/deg475 .8-gestation. *Hum Reprod*. 2003;18(11):2315

424 .25 Tang OS, Xu J, Cheng L, Lee SW, Ho PC. Pilot study on the use of sublingual misoprostol with  
425 mifepristone in termination of first trimester pregnancy up to 9 weeks gestation. *Hum Reprod*.  
426 .DOI: 10.1093/humrep/17.7.1738 .40-1738:(7)17;2002

427 .26 Viele K, Berry S, Neuenschwander B, Amzal B, Chen F, Enas N, et al. Use of historical control data  
428 .DOI: 10.1002/pst.1589 .54-for assessing treatment effects in clinical trials. *Pharm Stat*. 2014;13(1):41

429 .27 test -Aiken A, Lohr PA, Lord J, Ghosh N, Starling J. Effectiveness, safety and acceptability of no  
430 -medical abortion provided via telemedicine: a national cohort study. *BJOG*. 2021. DOI: 10.1111/1471  
431 .0528.16668

432 a love letter to the :19-Jayaweera RT, Moseson H, Gerdts C. Misoprostol in the era of COVID 28.  
433 original medical abortion pill. Sex Reprod Health Matters. 2020;28(1):1829406. DOI:  
434 .26410397.2020.1829406/10.1080

435 Gerdts C, Jayaweera RT, Kristianingrum IA, Khan Z, Hudaya I. Effect of a smartphone intervention .29  
436 abortion hotline clients in Indonesia: A -managed medication abortion experiences among safe-on self  
437 .DOI: 10.1002/ijgo.13086 .55-randomized controlled trial. Int J Gynaecol Obstet. 2020;149(1):48

438 Bracken H, Clark W, Lichtenberg ES, Schweikert SM, Tanenhaus J, Barajas A, et al. Alternatives to .30  
439 -routine ultrasound for eligibility assessment prior to early termination of pregnancy with mifepristone  
440 .x.0528.2010.02753-DOI: 10.1111/j.1471 .23-misoprostol. BJOG. 2011;118(1):17

441 Raymond E, Chong E, Winikoff B, Platais I, Mary M, Lotarevich T, et al. TelAbortion: evaluation of .31  
442 .7-a direct to patient telemedicine abortion service in the United States. Contraception. 2019;100(3):173  
443 .DOI: 10.1016/j.contraception.2019.05.013

444 Ashok PW, Templeton A, Wagaarachchi PT, Flett GM. Factors affecting the outcome of early 32.  
445 -j.1471/DOI: 10.1046 .9-medical abortion: a review of 4132 consecutive cases. BJOG. 2002;109(11):1281  
446 .x.0528.2002.02156

447

448

| مدة الحمل         | المايفبريستون بالإضافة إلى الميزوبروستول                                                                                                                                                                                                                                                                                                                                                    | الميزوبروستول بمفرده                                                                                                                                                                                                                                                                                                                                                                                                                                                                                         |
|-------------------|---------------------------------------------------------------------------------------------------------------------------------------------------------------------------------------------------------------------------------------------------------------------------------------------------------------------------------------------------------------------------------------------|--------------------------------------------------------------------------------------------------------------------------------------------------------------------------------------------------------------------------------------------------------------------------------------------------------------------------------------------------------------------------------------------------------------------------------------------------------------------------------------------------------------|
| حتى 90 يومًا      | ابتلعي قرصًا واحدًا من المايفبريستون (200 مجم) عن طريق الفم؛ بعد 24 إلى 48 ساعة، ضعي 4 حبات من الميزوبروستول (800 ميكروغرام) تحت اللسان، واطريها تذوب لمدة 30 دقيقة، واستمري في البلع حتى تذوب الحبوب، أو ضعها في المهبل؛ إذا لم تظهر أي علامات رد فعل أو آثار جانبية أو طرد بعد 3 ساعات، ضعي حبتين إضافيتين من الميزوبروستول (400 ميكروغرام) تحت اللسان أو في المهبل واطريهما يذوبان.      | ضعي أربع حبات (800 ميكروغرام) تحت اللسان، واطريها تذوب لمدة 30 دقيقة، واستمري في ابتلاع اللعاب حتى تذوب الحبوب؛ بعد 3 ساعات، ضعي الجرعة الثانية المؤلفة من أربع حبات (800 ميكروغرام) تحت اللسان واطريها تذوب لمدة 30 دقيقة، واستمري في ابتلاع اللعاب حتى تذوب الحبوب؛ بعد 3 ساعات، ضعي جرعة ثالثة مؤلفة من أربع حبات (800 ميكروغرام) تحت اللسان، واطريها تذوب لمدة 30 دقيقة، واستمري في ابتلاع اللعاب حتى تذوب الحبوب؛ استمري بوضع حبتين إلى أربع حبوب من الميزوبروستول تحت اللسان كل 3 ساعات حتى حدوث الطرد |
| أكبر من 90 يومًا* | ابتلعي قرصًا واحدًا من المايفبريستون (200 مجم) عن طريق الفم؛ وبعد 36 إلى 48 ساعة، ضعي حبتين من الميزوبروستول (400 ميكروغرام) تحت اللسان، واطريهما تذوبان لمدة 30 دقيقة، واستمري في ابتلاع اللعاب حتى تذوب الحبوب؛ بعد 3 ساعات، ضعي حبتين إضافيتين من الميزوبروستول (400 ميكروغرام) تحت اللسان، واطريهما تذوبان؛ استمري في تناول حبتين من الميزوبروستول تحت اللسان كل 3 ساعات حتى يحدث الطرد | ضعي حبتين (400 ميكروغرام) تحت اللسان، واطريهما تذوبان لمدة 30 دقيقة، واستمري في ابتلاع اللعاب حتى تذوب الحبتان؛ بعد 3 ساعات، ضعي الجرعة الثانية المؤلفة من حبتين (400 ميكروغرام) تحت اللسان، واطريهما تذوبان لمدة 30 دقيقة، واستمري في ابتلاع اللعاب حتى تذوب الحبوب؛ بعد 3 ساعات، ضعي جرعة ثالثة مؤلفة من حبتين (400 ميكروغرام) تحت اللسان، واطريهما تذوبان لمدة 30 دقيقة، واستمري في ابتلاع اللعاب حتى تذوب الحبوب؛ واصلي الأمر باستخدام حبتين من الميزوبروستول تحت اللسان كل 3 ساعات حتى يحدث الطرد       |

\*يُمكن العثور على تفاصيل إضافية حول الإجراءات المخصصة للإجهاض المُسرَّ ذاتيًا والمدعوم بالمرافقة للأعمار الحملية التي تتجاوز 12 أسبوعًا في مكان آخر<sup>21,22</sup>

452

453

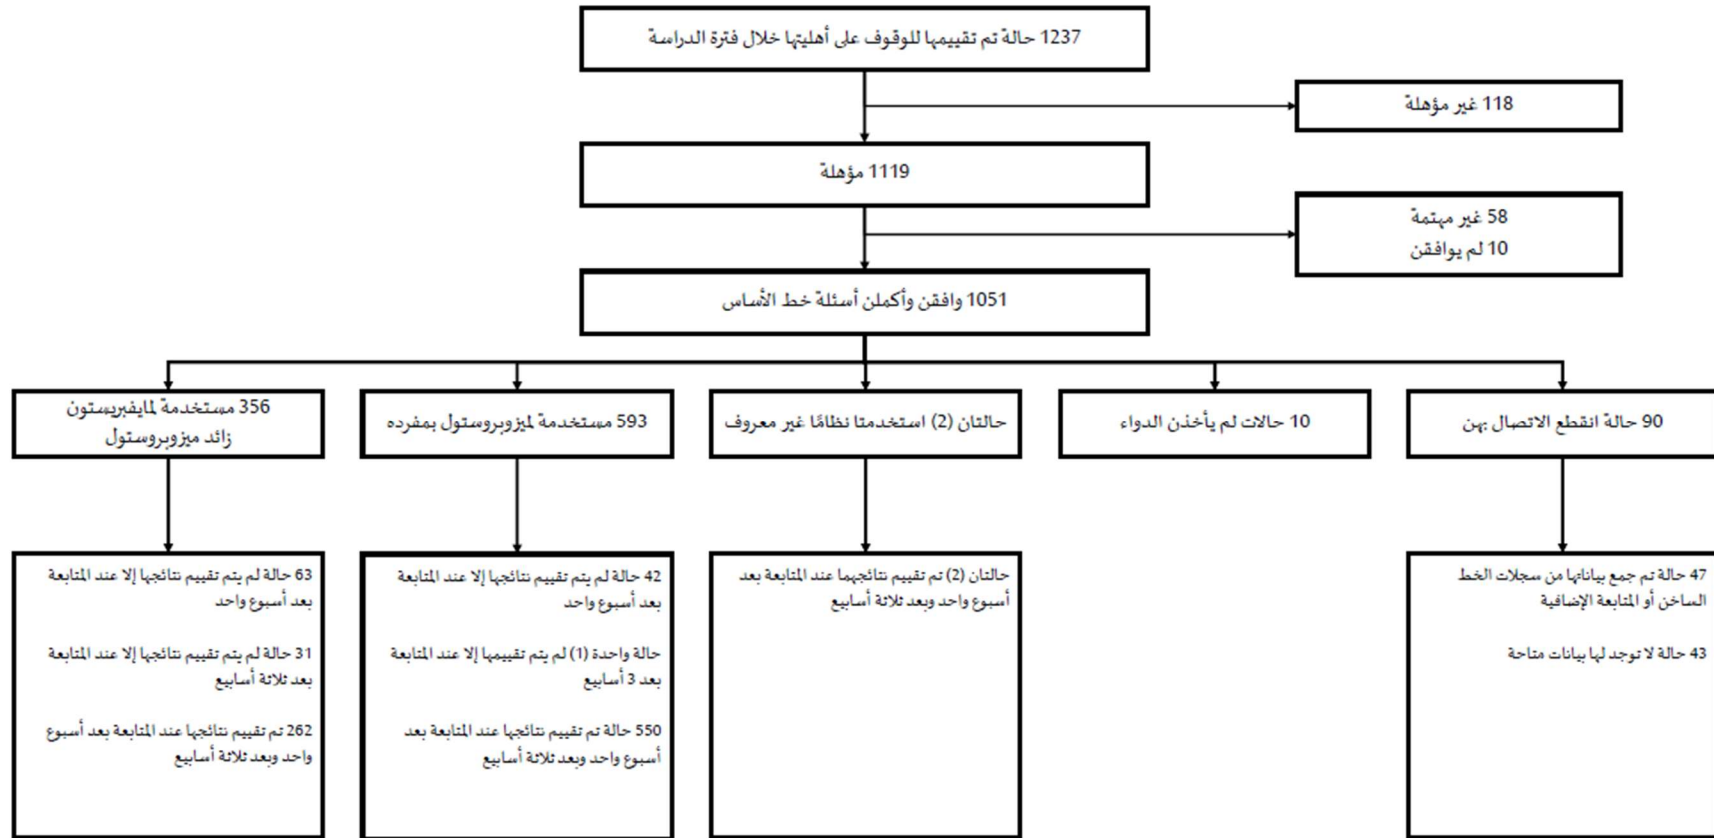

454

| العينة الكلية (أي مدة حمل) |       |                    |       |         |       |              |       |                              |
|----------------------------|-------|--------------------|-------|---------|-------|--------------|-------|------------------------------|
| النظام الدوائي             |       |                    |       |         |       |              |       |                              |
| غير معروف                  |       | ميزوبروستول بمفرده |       | المشترك |       | جميع الأنظمة |       |                              |
| %                          | العدد | %                  | العدد | %       | العدد | %            | العدد |                              |
| 100                        | 102   | 100                | 593   | 100     | 356   | 100          | 1051  | العدد عند خط الأساس          |
| (12.7)                     | 33.0  | (5.8)              | 28.5  | (6.3)   | 27.5  | (6.0)        | 28.1  | عمر المشاركة (بلسنوات)       |
| 0.0                        | 0     | 0                  | 0     | 0.6     | 2     | 0.2          | 2     | متوسط أعمار المشاركات (SD)   |
| 5.9                        | 6     | 2.9                | 17    | 7.6     | 27    | 4.8          | 50    | سنة 14                       |
| 33.3                       | 34    | 22.9               | 136   | 28.4    | 101   | 25.8         | 271   | سنة 19:15                    |
| 22.5                       | 23    | 36.1               | 214   | 28.9    | 103   | 32.4         | 340   | سنة 24:20                    |
| 21.6                       | 22    | 19.6               | 116   | 20.5    | 73    | 20.1         | 211   | سنة 29:25                    |
| 12.7                       | 13    | 15                 | 89    | 9.8     | 35    | 13           | 137   | سنة 34:30                    |
| 2.9                        | 3     | 3                  | 18    | 4.2     | 15    | 3.4          | 36    | سنة 39:35                    |
| 1.0                        | 1     | 0.3                | 2     | 0       | 0     | 0.3          | 3     | سنة 44:40                    |
| 0.0                        | 0     | 0.2                | 1     | 0       | 0     | 0.1          | 1     | سنة 49:45                    |
|                            |       |                    |       |         |       |              |       | سنة 50                       |
|                            |       |                    |       |         |       |              |       | مستوى التعليم                |
|                            | 0     | 0                  | 0     | 0.6     | 2     | 0.2          | 2     | لم يكمل أي تعليم             |
| 22.5                       | 23    | 2.4                | 14    | 27.2    | 97    | 12.7         | 134   | أكملن التعليم الأساسي        |
| 31.4                       | 32    | 41.8               | 248   | 32.9    | 117   | 37.8         | 397   | أكملن التعليم الثانوي        |
| 46.1                       | 47    | 55.8               | 331   | 39.3    | 140   | 49.3         | 518   | واصلن ما بعد التعليم الثانوي |
|                            |       |                    |       |         |       |              |       | تأكيد الحمل (حدد الكل)       |
| 72.5                       | 74    | 56.3               | 334   | 82      | 292   | 66.6         | 700   | أجرين اختبار حمل بالمنزل     |
| 24.5                       | 25    | 34.6               | 205   | 15.4    | 55    | 27.1         | 285   | أجرين اختبار دم في منشأة     |
| 6.9                        | 7     | 17.7               | 105   | 0.6     | 2     | 10.8         | 114   | أجرين اختبار بول في منشأة    |
| 16.7                       | 17    | 1.2                | 7     | 25      | 89    | 10.8         | 113   | موجات فوق الصوتية            |
| 4.9                        | 5     | 0.2                | 1     | 8.7     | 31    | 3.5          | 37    | تأخر / قوات الدورة الشهرية   |
| 2.0                        | 2     | 0                  | 0     | 3.1     | 11    | 1.2          | 13    | أعراض الحمل                  |
| 1.0                        | 1     | 0                  | 0     | 0       | 0     | 0.1          | 1     | غير تلك                      |
|                            |       |                    |       |         |       |              |       | مدة الحمل                    |
| (1.4)                      | 7.0   | (1.8)              | 6.7   | (2.6)   | 7.6   | (2.2)        | 7.0   | متوسط مدة الحمل (SD)         |
| 46.1                       | 47    | 55.8               | 330   | 39.6    | 141   | 49.4         | 518   | أسابيع < 7                   |
| 31.4                       | 32    | 29.3               | 174   | 37.6    | 134   | 32.4         | 340   | أسابيع [7-9]                 |
| 15.7                       | 16    | 12.5               | 75    | 14      | 50    | 13.3         | 141   | أسبوعاً [9-12]               |
| 6.9                        | 7     | 2.4                | 14    | 8.7     | 31    | 4.9          | 52    | أسبوعاً [12-22]              |





467 الشكل (2). تقييم لعدم الدونيّة في فعّالية الإجهاض الدوائي المُسيّر ذاتيّاً، حسب ما تم قياسه في دراسة الجدوى والفعّالية المصاحبة للدراسة (SAFE) بين 779 حالة مشاركة بأعمار  
 468 حملٍ تقل عن 9 أسابيع، مقارنة بفعّالية الإجهاض الدوائي الذي يديره الأطباء، حسب ما تم قياسه في التجارب السريرية التاريخية بين 1463 حالة مشاركة بأعمار حملٍ تقل عن 9  
 469 أسابيع

470

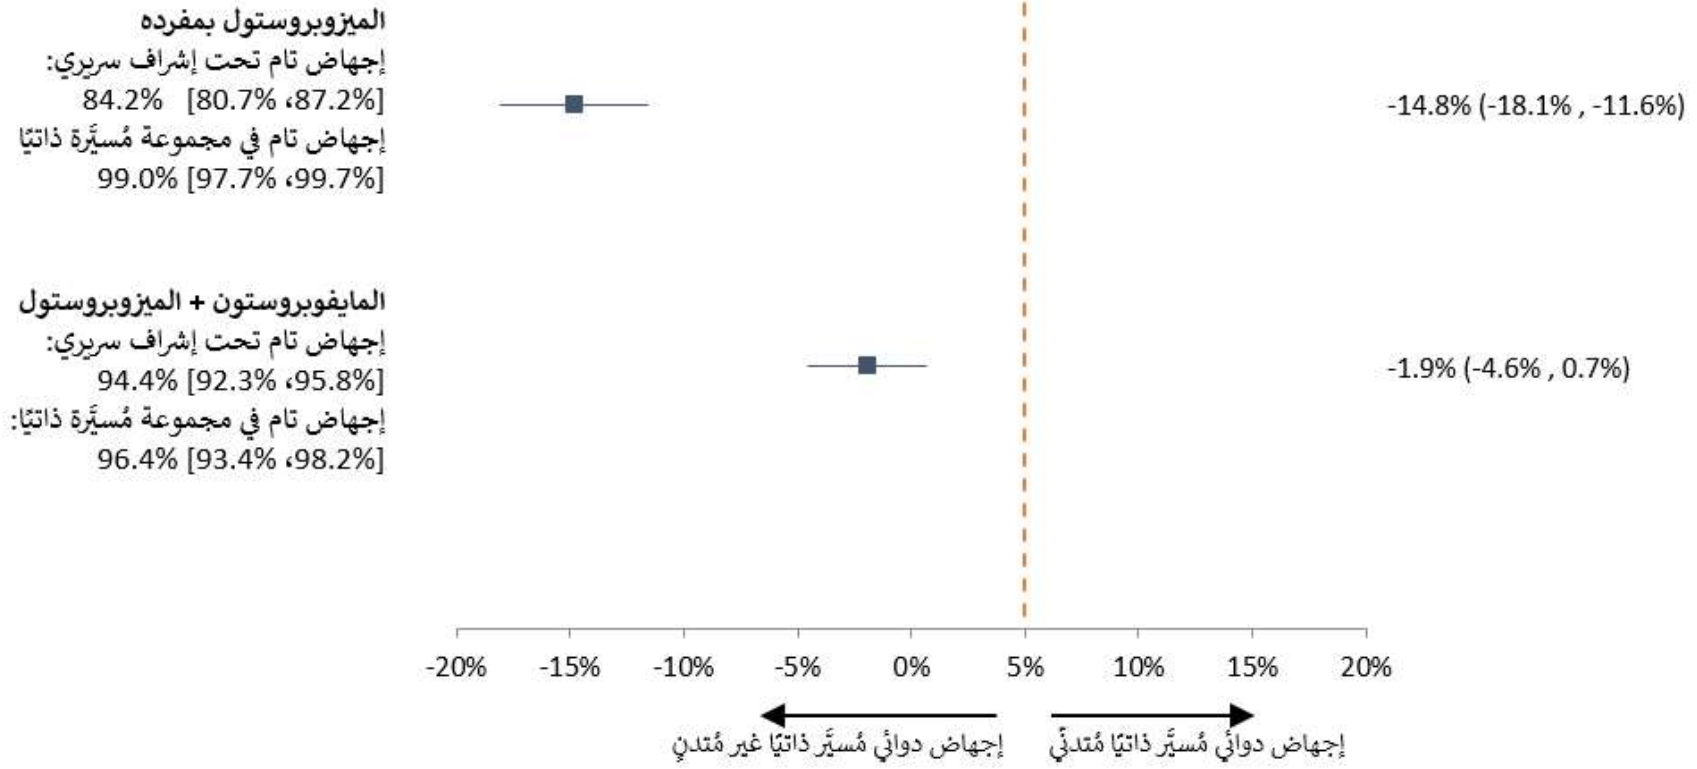

471
