# Supplementary material
Source: PubMed Central journal article supplement (PMC9359894)
Supplement: mmc3.pdf [file mmc3.pdf]

# THE LANCET

## Global Health

### Supplementary appendix 3

This translation in Bahasa was submitted by the authors and we reproduce it as supplied. It has not been peer reviewed. The Lancet's editorial processes have only been applied to the original in English, which should serve as reference for this manuscript.

Terjemahan dalam Bahasa Indonesia ini diserahkan oleh penulis dan diproduksi kembali apa adanya tanpa melalui proses peer review. Proses editorial Lancet hanya diterapkan pada versi original dalam Bahasa Inggris, yang harus dijadikan rujukan untuk naskah ini.

Supplement to: Moseson H, Jayaweera R, Egwuatu I, et al. Effectiveness of self-managed medication abortion with accompaniment support in Argentina and Nigeria (SAFE): a prospective, observational cohort study and non-inferiority analysis with historical controls. *Lancet Glob Health* 2021; published online Nov 18. [http://dx.doi.org/10.1016/S2214-109X\(21\)00461-7](http://dx.doi.org/10.1016/S2214-109X(21)00461-7).

**Judul:** Efektivitas self-managed abortion dengan pendampingan di Argentina dan Nigeria: Studi Kohort Prospektif Observasional dan Analisis Non-Inferioritas dengan Kontrol Historis

**Penulis:** Heidi Moseson, PhD<sup>1\*</sup>, Ruvani Jayaweera, PhD<sup>1</sup>, Ijeoma Egwuatu, BS<sup>2</sup>, Belén Grosso, BA<sup>3</sup>, Ika Ayu Kristianingrum, MA<sup>4</sup>, Sybil Nmezi, MA<sup>2</sup>, Ruth Zurbriggen, MEd<sup>3</sup>, Relebohile Motana, PDM<sup>5</sup>, Chiara Bercu, MPA<sup>1</sup>, Sofia Carbone, MPH<sup>1</sup>, Caitlin Gerds, PhD<sup>1</sup>.

**Afiliasi Penulis:**

<sup>1</sup> Ibis Reproductive Health, 1736 Franklin Street, Suite 600, Oakland, California, USA 94612

<sup>2</sup> Generation Initiative for Women and Youth, Lagos State, Nigeria

<sup>3</sup> La Revuelta Colectiva Feminista, Neuquén, Argentina

<sup>4</sup> Samsara, Yogyakarta, Indonesia

<sup>5</sup> Ibis Reproductive Health, Postnet Suite # 197, Private Bag X2600, Houghton 2041, Johannesburg, South Africa

**\*Penanggung Jawab**

Heidi Moseson, PhD MPH

Ibis Reproductive Health

1736 Franklin Street, Suite 600

Oakland, CA 94612

Kontak: +1.510.822.2696

Email: [hmoseson@ibisreproductivehealth.org](mailto:hmoseson@ibisreproductivehealth.org)

**Kata Kunci:** aborsi, pendampingan, mifepristone, misoprostol, self-managed abortion

**Pendanaan** David and Lucille Packard Foundation.

Hak Cipta © 2021 Penulis. Dipublikasikan oleh Elsevier Ltd. Artikel ini dapat diakses secara terbuka di bawah lisensi CC BY 4.0.

## 27 **Ringkasan**

## 28 **Latar Belakang**

29 Uji klinis telah membuktikan bahwa aborsi medis memiliki tingkat efektivitas dan keamanan yang  
30 tinggi dalam konteks klinis. Namun demikian, hambatan untuk melakukan aborsi di klinik telah  
31 menggeser sebagian besar aborsi medis ke luar konteks klinis, terutama saat pandemi COVID-19.  
32 Mengingat adanya pergeseran ini, penelitian ini bertujuan untuk memperkirakan efektivitas *self-*  
33 *managed abortion* (SMA) (aborsi medis tanpa intervensi klinis), dan membandingkannya dengan  
34 efektivitas aborsi medis dengan intervensi klinis.

## 35 **Metode**

36 Dalam studi kohort prospektif observasional ini, kami merekrut penelepon yang meminta  
37 informasi mengenai SMA dari dua kelompok pendamping aborsi aman di Argentina dan Nigeria.  
38 Sebelum menggunakan salah satu dari dua rejimen pengobatan (misoprostol saja atau  
39 dikombinasikan dengan mifepristone), partisipan melengkapi survei *baseline* dan dilanjutkan  
40 dengan dua survei tindak lanjut via telepon pada minggu pertama dan ketiga setelah  
41 mengkonsumsi pil. Hasil utamanya adalah proporsi partisipan yang melaporkan aborsinya komplit  
42 tanpa intervensi bedah. Pembatasan hukum dan etika mempersulit rekrutmen untuk kelompok  
43 kontrol klinis; oleh karenanya, studi ini melakukan analisis non-inferioritas yang membandingkan  
44 aborsi komplit di antara kelompok yang melakukan SMA dalam studi ini dengan aborsi komplit  
45 yang dilaporkan pada uji klinis terdahulu yang menggunakan protokol obat yang sama. Studi ini  
46 terbatas pada responden dengan usia kehamilan kurang dari 9 minggu. Studi ini terdaftar di  
47 ISCRTN (ISRCTN95769543).

48 **Temuan** Pada periode 31 Juli 2019 hingga 27 April 2020, kami melibatkan 1,051 partisipan ke  
49 dalam penelitian. Kami menganalisa hasil dari proses aborsi dari 961 partisipan dengan 47  
50 partisipan tambahan yang dihubungi setelah periode penelitian berakhir. Sebagian besar usia  
51 kehamilan partisipan adalah kurang dari 12 minggu. Partisipan yang ditindaklanjuti melakukan  
52 SMA dengan menggunakan misoprostol saja (593 partisipan) atau rejimen kombinasi dengan  
53 misoprostol dan mifepristone (356 partisipan). Pada survei tindak lanjut terakhir, 586 (99%)  
54 partisipan yang menggunakan misoprostol saja dan 334 (94%) partisipan yang menggunakan  
55 rejimen kombinasi menunjukkan aborsi yang komplit tanpa adanya intervensi bedah. Untuk  
56 partisipan dengan usia kehamilan kurang dari 9 minggu, efektivitas kedua rejimen bersifat non-  
57 inferior dengan aborsi pada konteks klinis.

58 **Interpretasi** Dua temuan dalam studi kohort prospektif ini menunjukkan bahwa SMA dengan  
59 dukungan kelompok pendamping sangat efektif, dan efektivitas SMA bagi partisipan dengan usia  
60 kehamilan kurang dari 9 minggu non-inferior dengan efektivitas aborsi medis yang dilayani oleh  
61 tenaga medis pada konteks klinis. Temuan-temuan ini mendukung penggunaan model layanan

jarak jauh untuk perawatan awal aborsi yang sudah lebih dulu ada, seperti telemedis, yang saat ini sedang dipertimbangkan di beberapa negara karena adanya pandemi COVID-19.

## **Konteks Penelitian**

### **Bukti dari Penelitian Sebelumnya**

Dalam studi ini, kami melakukan *systematic scoping review* pada beberapa studi untuk memahami temuan tentang efektivitas dan keamanan SMA di luar konteks klinis. Kami menelaah delapan basis data biomedis dan kesehatan masyarakat dalam bahasa Inggris dan Spanyol, tanpa batasan rentang waktu atau usia kehamilan. Tinjauan ini telah dipublikasikan sebelumnya dan kami telah mengidentifikasi delapan penelitian terdahulu yang membuktikan tingginya efektivitas SMA. Sejak tinjauan ini dipublikasikan, beberapa penelitian tambahan mengenai efektivitas SMA juga telah dipublikasikan. Sebagian besar merupakan studi dengan analisis retrospektif yang menunjukkan tingginya tingkat aborsi yang komplit dengan SMA; berdasarkan usia kehamilan, mulai dari 48,3% hingga 99,5%. Dalam tinjauan tersebut, kami mengidentifikasi bahwa hanya ada beberapa studi *prospektif* mengenai SMA dan belum ada studi yang secara formal mengukur perbandingan non-inferioritas SMA dengan aborsi medis pada konteks klinis, serta kaitannya dengan penyelesaian aborsi. Lebih jauh lagi, hanya ada sedikit studi yang melaporkan temuan tentang alasan-alasan yang melatarbelakangi pencarian layanan kesehatan setelah SMA.

### **Nilai Tambah dari Penelitian**

Hasil studi prospektif dari kedua negara ini membuktikan bahwa SMA, baik dengan mifepristone dan misoprostol maupun dengan misoprostol saja, sangatlah efektif dan aman; efektivitas pada usia kehamilan di bawah 9 minggu non-inferior dengan aborsi medis pada konteks klinis. Para partisipan yang melakukan SMA dengan pendampingan mengakses layanan di klinik dan rumah sakit, utamanya untuk mengkonfirmasi apakah aborsinya sudah komplit, dan bukan untuk alasan keselamatan.

### **Implikasi dari Seluruh Bukti yang Tersedia**

Data dari studi kami menunjukkan bahwa SMA dengan misoprostol saja atau dikombinasikan dengan mifepristone sangatlah efektif. Dengan adanya temuan ini, untuk memastikan akses pada layanan kesehatan yang aman, efektif dan rutin, Kementerian Kesehatan, organisasi profesional

dan dokter perlu menghapus batasan dan hambatan pada pendekatan SMA, dan sebaiknya lebih menyediakan akses atas informasi aborsi medis yang akurat di berbagai model penyediaan layanan—termasuk penggunaan secara mandiri. Hasil dari penelitian ini juga menunjukkan bahwa aborsi medis dengan pendampingan dapat menjadi strategi utama untuk memperluas akses pada layanan aborsi yang aman dan efektif terlepas dari konteks hukum yang ada.

## PENDAHULUAN

Sesuai rekomendasi WHO [1], rejimen kombinasi mifepristone dan misoprostol atau misoprostol saja telah terbukti sebagai metode yang aman dan efektif untuk menghentikan kehamilan. [2-4] Uji klinis telah menunjukkan tingkat efektivitas dan keamanan yang tinggi dari kedua rejimen aborsi medis pada 63 hari pertama usia kehamilan, [5,6] dan dari data terkini, hingga usia kehamilan 84 hari. [7] Data dari pengujian ini dikumpulkan baik dari partisipan yang berpenghasilan tinggi maupun rendah, [8] serta dari layanan aborsi yang disediakan oleh berbagai kader penyedia layanan klinis. [9,10]

Aborsi medis adalah metode untuk menghentikan kehamilan yang berbiaya rendah, aman, efektif, dan cukup sederhana. Meskipun demikian, terbatasnya konteks hukum, kurangnya penyedia layanan yang terlatih atau yang mau menyediakan, tingginya biaya pelayanan medis, adanya kesalahan penanganan di fasilitas kesehatan serta permasalahan logistik dan sosial menjadi hambatan yang masih terus muncul dalam mengakses layanan aborsi pada konteks klinis. [11] Akibatnya secara global, aborsi dengan penggunaan obat-obatan seringkali dilakukan di luar konteks klinis. [12] Penggunaan obat-obatan untuk menghentikan kehamilan yang dilakukan secara mandiri, tanpa pengawasan pihak klinik, disebut dengan SMA. [11] Contoh dari SMA dimulai dari pembelian obat secara *online* atau dari apotek lokal dan konsumsi obat di rumah tanpa pendampingan pihak klinik, hingga SMA yang didukung oleh kelompok pendamping aborsi aman—di mana konselor aborsi yang terlatih (sebagian besar tidak mendapat pelatihan klinis) menyediakan konseling berbasis bukti dan dukungan yang berorientasi pada individu (dilakukan melalui telepon atau tatap muka) kepada pihak yang melakukan SMA. Model pendampingan SMA muncul sebagai perwujudan aksi yang otonom atas kesehatan dan penentuan nasib sendiri yang dicetuskan oleh gerakan feminis sebagai tanggapan atas kegagalan negara dalam menyediakan

119 layanan aborsi aman. Karakteristik dari gerakan ini adalah adanya strategi yang berbasis komunitas  
120 dan digerakkan oleh para aktivis untuk memfasilitasi penggunaan obat-obatan yang tersedia secara  
121 luas di luar konteks klinis. [13] Bagi sebagian orang, SMA adalah model layanan yang lebih  
122 disukai karena adanya privasi dan kenyamanan yang ditawarkan; bagi sebagian lainnya, aborsi  
123 medis adalah satu-satunya pilihan saat layanan klinis tidak dapat diakses. [11]

124 Sejalan dengan uji klinis yang telah membuktikan tingkat keamanan dan keberhasilan  
125 aborsi medis, semakin banyak bukti yang menunjukkan efektivitas dan keamanan aborsi medis.  
126 [11,14,15] Namun, dalam banyak kasus, keterbatasan penelitian seperti ketergantungan pada  
127 kajian retrospektif, ukuran sampel yang kecil dan hilangnya partisipan saat tindak lanjut, telah  
128 mengurangi pemanfaatan hasil temuan secara optimal. [16] Panduan WHO menekankan perlunya  
129 bukti tentang keamanan, keberhasilan, dan penerimaan aborsi medis di luar konteks klinis,  
130 terutama untuk kehamilan lebih dari 10 minggu. Di samping itu, ada pula kebutuhan untuk  
131 memahami peran individu dalam melakukan penilaian mandiri, seperti, apakah ia memenuhi syarat  
132 dan apakah aborsinya telah komplit—terutama pada penggunaan rejimen misoprostol saja, yang  
133 menurut data klinis dinilai kurang efektif. [1] Selain itu, ada peningkatan kebutuhan untuk  
134 mengumpulkan data yang lebih akurat tentang pengalaman melakukan SMA serta pencarian  
135 layanan kesehatan pada saat dan setelah melakukan SMA, untuk mengetahui bahwa individu dapat  
136 mengelola keseluruhan proses aborsi medis secara aman dan efektif.

137 Kelompok pendamping aborsi memiliki platform yang menjanjikan untuk melakukan  
138 penelitian prospektif tentang SMA yang akurat. [18] Untuk mengisi celah atas minimnya studi  
139 tentang SMA, kami melakukan penelitian kohort prospektif observasional untuk memperkirakan  
140 efektivitas kedua rejimen (mifepristone dan misoprostol (kombinasi) dan misoprostol saja) ketika  
141 digunakan untuk menghentikan kehamilan tanpa pengawasan dari pihak klinik, tetapi didukung  
142 oleh kelompok pendamping. Selain itu, studi ini juga bermaksud membandingkan efektivitas SMA  
143 dengan pendampingan dengan aborsi medis dengan intervensi klinis pada studi terdahulu dengan  
144 analisis non-inferioritas. Namun karena adanya pembatasan hukum tentang aborsi di kedua lokasi  
145 penelitian, rekrutmen untuk kelompok kontrol menjadi tidak memungkinkan dan tidak etis untuk  
146 dilakukan. Hipotesis dari penelitian ini adalah tingkat efektivitas SMA dengan kedua rejimen akan  
147 tinggi ( $> 90\%$ ), serta efektivitas tersebut akan bersifat non-inferior dengan efektivitas aborsi medis  
148 yang dilakukan pada konteks klinis dengan margin non-inferioritas sebesar 5%.

150 **METODE**151 *Rancangan Penelitian dan Partisipan*

152 Penelitian *studying accompaniment feasibility and effectiveness* (SAFE) adalah sebuah studi  
153 kohort prospektif observasional yang melibatkan penelepon yang menghubungi kelompok  
154 pendamping SMA untuk mendapatkan informasi dan dukungan, dan ditindaklanjuti hingga 4  
155 minggu untuk melakukan penilaian pada hasil dari proses aborsi dan pengalamannya. Hasil dari  
156 penelitian pilot, serta keseluruhan detail dari protokol penelitian ini telah dipublikasikan  
157 sebelumnya.[16, 18]

158 Kami merekrut penelepon dari dua kelompok pendamping aborsi—salah satunya di  
159 Argentina (berbasis di Neuquén dan utamanya melayani provinsi Neuquén) dan satu di Nigeria  
160 (berbasis di negara bagian Lagos, melayani seluruh negara). Pada periode pengumpulan data,  
161 aborsi merupakan tindakan ilegal di kedua negara tersebut, kecuali aborsi untuk menyelamatkan  
162 nyawa yang mengalami kehamilan,[19] dan/atau kasus perkosaan untuk konteks Argentina. [20]  
163 Setiap orang yang menghubungi salah satu kelompok pendamping selama periode penelitian untuk  
164 meminta informasi tentang aborsi yang diinduksi untuk kehamilan mereka, melewati proses  
165 penyaringan untuk menentukan apakah ia memenuhi syarat terlibat dalam penelitian. Siapapun  
166 penelepon yang berusia 13 tahun atau lebih, sedang akan memulai proses aborsi medis, tidak  
167 memiliki kontraindikasi untuk aborsi medis [1], dan usia kehamilannya masih berada dalam  
168 kapasitas layanan kelompok pendamping—hingga 24 minggu di Argentina dan 15 minggu di  
169 Nigeria—dianggap memenuhi syarat. [16] Kami mengecualikan partisipan yang mengalami reaksi  
170 yang masih berjalan (perdarahan, kram) dari percobaan aborsi sebelumnya, yang mengalami gejala  
171 kehamilan ektopik, atau yang tidak bersedia atau tidak dapat dihubungi oleh staf peneliti.

172 Seluruh partisipan memberikan persetujuan secara lisan. *The Allendale Investigational*  
173 *Review Board* telah meninjau dan menyetujui studi di kedua negara ini. Selain itu *the Fundación*  
174 *Huésped IRB* juga telah menyetujui protokol penelitian di Argentina. *Data Monitoring and*  
175 *Oversite Committee* sebagai lembaga independen telah meninjau protokol dan instrumen  
176 penelitian serta perencanaan analisis sementara untuk hal-hal yang menyangkut keamanan.

## 177 *Prosedur*

178 Pada survei *baseline*, seluruh partisipan mendapatkan instruksi secara bertahap dari  
179 konselor di kelompok pendamping berdasarkan protokol aborsi medis yang direkomendasikan  
180 oleh WHO (Tabel 1)—berdasarkan pada usia kehamilan (dikonfirmasi oleh hasil ultrasonografi  
181 yang dilakukan partisipan atau hari pertama menstruasi terakhir), [1,16] dan jenis obat yang dapat  
182 diakses oleh partisipan.

183 Setelah melakukan konseling untuk informasi awal, partisipan menjawab serangkaian  
184 pertanyaan pada survei *baseline* yang dilakukan oleh konselor pendampingnya. Pada  
185 pengumpulan data berikutnya, koordinator penelitian yang terlatih menghubungi setiap partisipan  
186 pada dua waktu yang berbeda (1 minggu dan 3 minggu setelah penggunaan obat dosis pertama)  
187 untuk memberi penilaian pada akses dan penggunaan obat, mendokumentasikan efek samping,  
188 tambahan dosis yang dikonsumsi, kompliknya aborsi, kemungkinan komplikasi, dan keputusan  
189 untuk mengakses layanan kesehatan. Partisipan mendapatkan kompensasi sebesar \$10-25 Dolar  
190 AS atas partisipasinya dalam studi ini. Prosedur penelitian di dua negara ini bersifat konsisten,  
191 dengan pengecualian pada cara mengkonfirmasi kehamilan: konselor di Argentina menawarkan  
192 kepada beberapa partisipan yang dipilih secara acak untuk melakukan tes urin untuk  
193 mengkonfirmasi kehamilannya (sedangkan hal ini tidak dilakukan di Nigeria).

## 194 *Hasil*

195 Hasil utama dari studi ini adalah efektivitas SMA dengan pendampingan, dihitung dari  
196 persentase responden yang secara mandiri melaporkan bahwa aborsinya komplit tanpa intervensi  
197 bedah, secara keseluruhan, dan menurut rejimen pengobatan. Penelitian telah menunjukkan bahwa  
198 partisipan dapat menilai aborsinya sudah komplit secara mandiri dan akurat. [21] Hasil sekunder  
199 dari studi ini adalah penilaian non-inferioritas terhadap efektivitas SMA yang dibandingkan  
200 dengan efektivitas aborsi medis dengan intervensi klinis yang telah diukur oleh penelitian  
201 sebelumnya.

202 Hasil-hasil lain dalam studi ini adalah sumber obat, dan penggunaan obat, faktor yang  
203 mempengaruhi penilaian mandiri pada kompliknya aborsi, dan perilaku dalam mengakses layanan  
204 kesehatan serta penanganan yang didapatkan. Untuk mengukur hasil mengenai keselamatan dan

kejadian yang tidak diharapkan, kami meminta partisipan untuk melaporkan apakah mereka mengalami salah satu dari sembilan indikator keselamatan yang berbeda-beda (perdarahan hebat, nyeri hebat, keputihan berbau busuk, demam tinggi, penggunaan antibiotik, penggunaan aspirasi vakum manual atau dilatasi dan kuretase, transfusi darah, penggunaan cairan infus, dan fasilitas rawat inap). Partisipan juga diminta untuk melaporkan jenis perawatan lainnya. Selain itu, kami mengumpulkan data tambahan dari partisipan seperti usia, pendidikan, cara mengkonfirmasi kehamilan, dan usia kehamilan.

### *Analisis Statistik*

Kami bermaksud mengestimasi proporsi partisipan dengan aborsi komplit tanpa intervensi bedah setelah melakukan SMA dengan mifepristone dan misoprostol atau misoprostol saja; dan untuk mengevaluasi apakah efektivitas SMA non-inferior terhadap efektivitas aborsi medis yang melibatkan pihak klinik, seperti yang dihasilkan oleh penelitian pada konteks klinis terdahulu, dengan margin 5%.[22-25].

Untuk analisis utama penelitian ini, kami sebelumnya memerinci pengecualian partisipan dengan hasil aborsi yang tidak diketahui agar sejalan dengan perbandingan uji coba klinis.[16.22] Perbandingan partisipan dengan aborsi komplit dalam studi ini dilihat dari respon yang bersangkutan pada dua pertanyaan “Apakah anda merasa proses aborsi sudah komplit?“, begitu pula dengan ada tidaknya informasi penggunaan aspirasi vakum manual atau dilatasi dan kuretase. Partisipan yang melaporkan bahwa aborsinya telah komplit dan tidak menginformasikan bahwa mereka mendapatkan intervensi bedah dikategorikan sebagai “komplit tanpa intervensi bedah“; partisipan dengan aborsi komplit dan melaporkan adanya aspirasi vakum manual atau dilatasi dan kuretase dikategorikan sebagai “komplit dengan intervensi bedah.“ Partisipan yang melaporkan bahwa aborsinya tidak komplit, atau tidak yakin apakah aborsinya sudah komplit, dikategorikan sebagai “Tidak komplit atau tidak yakin.“ Kami menghitung semua perbandingan secara keseluruhan, baik menurut rejimen pengobatan maupun usia kehamilan (<7 minggu, 7-9 minggu, 10-12 minggu, and  $\geq 13$  minggu). Karena adanya perbedaan izin peredaran mifepristone di tiap negara dan banyaknya pertimbangan yang harus diwaspadai atas nama mitra pelaksana, kami tidak melaporkan jumlah pengguna rejimen berdasarkan negaranya. Partisipan dari kedua negara

direpresentasikan melalui kelompok rejimen, oleh karena itu kami mengumpulkan data lintas negara untuk menghitung hasil utama.

Membuktikan efektivitas dan keamanan SMA yang dibandingkan dengan aborsi medis pada konteks klinis adalah celah penting pembuktian dalam penelitian ini. Karena adanya pembatasan hukum, rekrutmen kelompok kontrol sebagai bagian dalam penelitian SAFE ini menjadi tidak etis, dan tidak memungkinkan untuk dilakukan. Oleh karenanya, dengan data dari penelitian yang sudah ada sebelumnya [26], kami mengidentifikasi uji acak terkontrol mengenai efektivitas aborsi medis pada konteks klinis yang telah dipublikasikan sebelumnya. Uji acak ini menjadi kontrol historis untuk analisis non-inferioritas: tiga uji coba meneliti rejimen kombinasi yang sama[23-25], dan satu uji coba meneliti rejimen yang sama untuk misoprostol saja[22]. Uji coba ini adalah satu-satunya yang teridentifikasi, di mana rejimen yang digunakan sama dengan rejimen yang direkomendasikan oleh kelompok pendamping dan kesemuanya ada di dalam panduan aborsi aman yang relevan.[1] Kontrol historis tidak dimaksudkan untuk menggantikan pengacakan; namun demikian, untuk menilai dapat atau tidaknya perbandingan dilakukan, kami menguji perbedaan usia dan durasi kehamilan peserta dalam studi SAFE ini dan membandingkannya dengan kontrol historis menggunakan *t-test* dan uji proporsi. Kami mengekstraksi data aborsi komplik dari hasil kontrol historis pada penelitian sebelumnya yang telah dipublikasikan.

Kami melakukan dua uji non-inferioritas: satu di antara pengguna rejimen misoprostol saja dan lainnya pada pengguna rejimen kombinasi. Kami membatasi sampel penelitian SAFE pada partisipan dengan usia kehamilan <9 minggu agar memenuhi kriteria persyaratan dalam studi perbandingan. Seluruh detail analisis non-inferioritas telah dipublikasikan sebelumnya dan diperinci di Lampiran 6.

Data dianalisis dengan menggunakan perangkat lunak statistik STATA versi 15.1. Target ukuran sampel minimum adalah 213 untuk rejimen kombinasi dan 419 untuk rejimen misoprostol saja. Uji satu pihak digunakan untuk menentukan apakah SMA dengan dukungan pendamping tidak melebihi 5% kurang efektif daripada aborsi medis dengan intervensi klinis untuk tiap rejimen, dengan 80% daya uji, 5% alpha dan tidak ada korelasi dengan konselor (berdasarkan hasil studi pilot). [18] Penelitian ini terdaftar di ISRCTN, ISRCTN95769543.

262

263 *Peran Sumber Pendanaan*

264 Pendana penelitian ini tidak terlibat dalam rancangan penelitian, pengumpulan data, analisis,  
265 interpretasi atau penulisan laporan.

266 **HASIL**

267 Pada periode 31 Juli 2019 hingga 27 April 2020, tim peneliti menyaring 1,237 penelepon untuk  
268 penilaian persyaratan (Gambar 1). 118 (10%) tidak memenuhi syarat karena membutuhkan  
269 dukungan yang tidak terkait dengan aborsi, sudah memulai proses aborsi medis, atau mengalami  
270 gejala aborsi yang masih berjalan atau keguguran. Di antara 1,119 partisipan yang memenuhi  
271 syarat, 1,051 (94%) bersedia untuk berpartisipasi, melengkapi survei baseline dan terlibat dalam  
272 penelitian (n=401 dari Argentina, n=650 dari Nigeria). 961 (91%) dari 1,051 partisipan telah  
273 mengikuti paling tidak satu survei tindak lanjut dan melaporkan apakah mereka sudah  
274 mendapatkan dan mengonsumsi obat. Di antara partisipan tersebut, 929 (97%) dari 961  
275 melengkapi survei setelah satu minggu dan 846 (88%) melengkapi survei setelah tiga minggu. 90  
276 (9%) dari 1,051 partisipan tidak mengikuti survei tindak lanjut setelah pengisian survei *baseline*;  
277 47 (4%) dihubungi kemudian untuk memastikan hasil utama dan 43 (4%) tidak diketahui hasilnya.

278 Rentang usia partisipan adalah 14-50 tahun, dengan persentase usia terbanyak di 20-29  
279 tahun (Tabel 2). Partisipan dari Argentina bertempat tinggal di tiga provinsi (Neuquén, Río Negro,  
280 dan Salta). Partisipan dari Nigeria bertempat tinggal di 29 negara bagian (sebagian besar di Lagos,  
281 Imo dan Abia). Sebagian besar partisipan mengkonfirmasi kehamilannya dengan tes kehamilan di  
282 rumah. Di antara sampel partisipan acak yang melakukan tes kehamilan di rumah berdasarkan dari  
283 survei baseline, 2 (2%) dari 102 menunjukkan hasil tes yang negatif. Partisipan melaporkan  
284 kehamilannya pada usia 4 hingga 22 minggu. Sebagian besar usia kehamilan kurang dari 12  
285 minggu.

286 Pada survei tindak lanjut setelah satu minggu, 922 partisipan telah mendapatkan obat dan  
287 919 telah mengkonsumsinya, termasuk mereka yang menerima obat yang tidak diketahui  
288 (Lampiran 6). Tiga partisipan melaporkan bahwa mereka telah mendapatkan obat namun tidak  
289 mengkonsumsinya karena memutuskan untuk melanjutkan kehamilan (tiga [ $<1\%$ ] partisipan).

290 Bagi pengguna rejimen kombinasi, semua partisipan menggunakan mifepristone terlebih dahulu  
291 dan diikuti dengan empat butir misoprostol (349/356, 98.0%) dan dikonsumsi secara sublingual  
292 (274/356, 77.0%; Lampiran 6). Tiga partisipan (1%) melaporkan menggunakan dosis kedua  
293 dengan satu butir mifepristone sebelum melanjutkan ke misoprostol—ketiga partisipan ini  
294 memiliki usia kehamilan yang lebih tinggi (16, 17 dan 19 minggu). Bagi pengguna rejimen  
295 misoprostol saja, sebagian besar menggunakan empat pil pada ketiga dosis dan hampir semuanya  
296 secara sublingual. Partisipan dari kedua negara direpresentasikan dalam setiap kelompok rejimen;  
297 namun demikian, sebagian besar pengguna rejimen kombinasi berada di Argentina, sedangkan  
298 pengguna misoprostol saja sebagian besar ada di Nigeria.

299         Sekitar satu minggu setelah mengkonsumsi pil, 868 (94%) dari 919 partisipan yang  
300 mengkonsumsi obat dan menyelesaikan survei tindak lanjut pertama melaporkan aborsinya  
301 komplit tanpa intervensi bedah (300 [92%] dari 325 pengguna rejimen kombinasi, dan 566 [96%]  
302 pengguna misoprostol saja), dan tambahan sepuluh (1%) partisipan yang melaporkan aborsi  
303 komplit dengan intervensi bedah (Tabel 3). Pada survei tindak lanjut terakhir, 922 (97%) dari 951  
304 partisipan melaporkan aborsinya komplit tanpa intervensi bedah dan 17 (2%) melaporkan  
305 aborsinya komplit dengan intervensi bedah. Maka dari itu, aborsi komplit untuk kedua rejimen  
306 menunjukkan persentase yang tinggi. Di antara pengguna rejimen kombinasi, intervensi bedah  
307 untuk membantu penyelesaian aborsi meningkat seiring dengan usia kehamilan yang lebih tinggi.

308         Setelah periode penelitian berakhir, koordinator penelitian menghubungi 47 (52%) dari 90  
309 partisipan yang tidak dapat dihubungi pada saat survei tindak lanjut untuk mengumpulkan data  
310 hasil utama—39 melaporkan aborsinya komplit tanpa intervensi bedah. Dengan asumsi sederhana,  
311 43 (48%) partisipan lainnya yang tidak dapat dihubungi setelah survei *baseline* aborsinya tidak  
312 komplit. Keseluruhan aborsi komplit tanpa intervensi bedah pada survei tindak lanjut terakhir  
313 berada pada angka 961 (91%) dari 1,051 partisipan. Setelah mengikutsertakan data terkait  
314 intervensi bedah dan keguguran di antara partisipan yang tidak mengikuti survei tindak lanjut, 987  
315 (94%) partisipan tidak lagi mengalami kehamilan pada survei tindak lanjut akhir.

316         Di antara partisipan yang melaporkan aborsi komplit, hampir semuanya menyebutkan lebih  
317 dari satu faktor yang mempengaruhi proses penilaian atas komplitnya aborsi, termasuk 367 (39%)

318 partisipan yang melaporkan adanya bantuan dari pihak klinik untuk mengkonfirmasi aborsinya  
319 komplit (Lampiran 6).

320 Selama sesi tindak lanjut, 192 (20%) dari 951 partisipan mencari layanan kesehatan dari  
321 rumah sakit atau klinik (120 [34%] pengguna rejimen kombinasi, 71 [12%] pengguna misoprostol  
322 saja, dan 1 [8%] partisipan dengan rejimen pengobatan yang tidak diketahui (Lampiran 6). Di  
323 antara para partisipan yang mencari layanan kesehatan, sebagian besar melakukan hal tersebut  
324 untuk mengkonfirmasi bahwa aborsinya komplit (157 [82%] dari 192 partisipan). 21 [11%] dari  
325 192 partisipan mengakses layanan kesehatan terkait keluhanannya tentang nyeri, perdarahan,  
326 keputihan, atau demam. Sebagian besar partisipan melaporkan bahwa jenis layanan kesehatan  
327 yang mereka dapatkan adalah ultrasonografi (80 [8%] dari 951 partisipan), obat pereda nyeri (25  
328 [3%] partisipan), cairan infus (19 [2%] partisipan), dan antibiotik (16 [2%] partisipan). 17 (2%)  
329 partisipan melaporkan mendapatkan layanan aspirasi vakum manual atau dilatasi dan kuretase dan  
330 12 (1%) melaporkan rawat inap di fasilitas kesehatan (semuanya melakukan aspirasi vakum  
331 manual atau dilatasi dan kuretase), dan (1%) partisipan melaporkan menerima transfusi darah.  
332 Partisipan di Argentina lebih banyak mendapatkan layanan aspirasi vakum manual atau dilatasi  
333 dan kuretase dibandingkan partisipan dari Nigeria (perbedaan resiko=9.2; 95%CI: 3.4-15.0; p  
334 =0.0013). 782 (82%) dari 951 partisipan melaporkan bahwa tidak ada tanda komplikasi, 84 (9%)  
335 melaporkan adanya perdarahan dengan menggunakan lebih dari dua pembalut setiap 1 jam dan  
336 berlangsung lebih dari 2 jam, 80 (8%) melaporkan adanya cairan keputihan yang berwarna dan  
337 berbau busuk, 50 (5%) melaporkan adanya rasa nyeri yang mengganggu aktivitas normal, dan 16  
338 (2%) melaporkan demam tinggi dengan suhu lebih dari 38 derajat Celcius selama lebih dari 24  
339 jam.

340 Untuk analisis non-inferioritas, 1,463 partisipan yang dapat dievaluasi di empat studi  
341 kontrol historis pembandingan, memiliki usia kehamilan kurang dari 9 minggu, bertempat tinggal di  
342 salah satu dari 11 negara (Armenia, Cina, Kuba, Georgia, India, Mongolia, Rumania, Slovenia,  
343 Swedia, Thailand, dan Vietnam), dan diacak untuk rejimen aborsi medis yang sama pada studi  
344 SAFE ini (951 untuk rejimen kombinasi dan 512 untuk misoprostol saja), dan dibandingkan  
345 dengan 779 partisipan studi SAFE dengan usia kehamilan kurang dari 9 minggu (275 untuk  
346 rejimen kombinasi dan 504 untuk misoprostol saja). Dengan berdasar pada rejimen pengobatan,  
347 partisipan dalam studi SAFE dan studi kontrol historis cenderung menunjukkan hasil yang sama,

walaupun usia partisipan studi SAFE sedikit lebih tua (rata-rata 1-4 tahun) dan usia kehamilan sedikit lebih muda (rata-rata sekitar 1 minggu; Lampiran 6).

Di antara pengguna rejimen kombinasi, aborsi komplit pada partisipan studi SAFE dengan usia kehamilan kurang dari 9 minggu berjumlah 96% (265 dari 275 partisipan), sebagaimana dibandingkan dengan tingkat aborsi komplit sebesar 94% (898 dari 951 partisipan) yang dikumpulkan dari tiga kelompok kontrol historis (perbedaan resiko= -1.9%, 95%CI: -4.6 sampai 0.7%; Gambar 2 dan Lampiran 6)[23-25]. Di antara pengguna misoprostol saja, aborsi komplit di antara partisipan studi SAFE dengan usia kehamilan kurang dari 9 minggu berjumlah 99.0% (499 dari 504 partisipan), dibandingkan dengan aborsi komplit pada satu kelompok kontrol historis sebesar 84% (431 dari 512 partisipan) (perbedaan resiko= -14.8%, 95%CI: -18.1 sampai -11.6%; Gambar 2 dan Lampiran 6).[22] Dengan batas atas di 95%, interval kepercayaan untuk perbedaan risiko antara SMA dan aborsi medis klinis untuk kedua rejimen lebih kecil dari 5% margin non-inferioritas; maka kami menolak hipotesis nol inferioritas.

## PEMBAHASAN

Temuan kami menunjukkan bahwa SMA dengan dukungan kelompok pendamping sangatlah efektif, dan untuk kehamilan kurang dari 9 minggu, hasilnya non-inferior dengan efektivitas aborsi medis yang dilakukan dengan pada konteks klinis. Dengan adanya tindak lanjut selama sekitar 4 minggu, sebagian besar partisipan mendapatkan obat, menggunakannya sesuai protokol dari WHO, dan menyelesaikan aborsinya secara komplit; sejumlah kecil partisipan mencari pelayanan kesehatan di klinik atau rumah sakit, utamanya untuk mengkonfirmasi bahwa aborsinya sudah komplit.

Hasil temuan kami memberikan kontribusi pada semakin berkembangnya pembuktian terkait efektivitas dan keamanan SMA, dengan atau tanpa dukungan pendamping.[11,14-16] Temuan-temuan ini, jika digabungkan, memiliki beberapa implikasi yang luas. Pertama, hasil dari studi SAFE semakin memperkuat bukti bahwa aborsi medis efektif dilakukan pada berbagai macam model pelayanan, baik pada konteks klinis maupun non-klinis. Keamanan dan efektivitas aborsi medis telah banyak ditunjukkan dalam berbagai macam konteks, baik yang didukung oleh

tenaga kesehatan maupun konteks klinis yang tradisional,[3, 22-25] melalui panggilan video dengan pihak klinik,[27] dan secara mandiri dengan bantuan dari apotek[15]. Temuan-temuan ini menunjukkan bahwa aborsi medis juga efektif dilakukan secara mandiri di rumah dengan informasi yang diberikan oleh konselor aborsi yang sudah terlatih secara non-klinis.

Selain itu, temuan dari studi SAFE mengindikasikan bahwa SMA dengan dukungan pendamping adalah layanan yang aman, dan konselor dengan pelatihan non-klinis dapat memberikan dukungan pada orang-orang untuk memahami kapan dan bagaimana mereka perlu mengakses layanan kesehatan selama melakukan SMA. Amatan atas perbedaan ketersediaan akses aspirasi vakum manual di kedua negara kemungkinan disebabkan oleh perbedaan aksesibilitas layanan termasuk perbedaan relasi antara kelompok pendamping dengan penyedia layanan kesehatan yang terpercaya. Walaupun kami tidak dapat memastikan alasan setiap orang yang memutuskan untuk mengakses layanan kesehatan, data kami menunjukkan bahwa mereka mengakses layanan tersebut jika dibutuhkan. Dari perspektif pengukuran, temuan-temuan ini menantang gagasan di mana akses pada layanan kesehatan pada saat atau setelah SMA dilakukan hanya untuk situasi komplikasi; dan penyedia layanan kesehatan pun seharusnya mendorong sistem kesehatan untuk mempertimbangkan kembali cara yang terbaik untuk mendukung mereka yang melakukan SMA.

Hal penting lainnya adalah efektivitas rejimen misoprostol saja dalam studi SAFE lebih tinggi daripada yang biasanya dilaporkan dalam uji klinis.[6] Walaupun begitu, temuan dalam studi ini konsisten dengan tingkat efektivitas sebesar 96,2-96,4% seperti yang dilaporkan dalam studi terkini mengenai SMA dengan misoprostol saja.[14,15,18] Efektivitas yang lebih tinggi dari rejimen misoprostol saja juga dapat dilihat dalam penelitian-penelitian aborsi dengan konteks mandiri dan intervensi klinis. Hal ini dapat dikaitkan dengan beberapa faktor; pertama, penelitian SMA seringkali menilai kompli tidaknya aborsi setelah 3-4 minggu, sedangkan dalam uji klinis, periode waktu penilaian cenderung lebih singkat, yaitu sekitar 1-2 minggu.[28] Selain itu, dalam uji klinis, partisipan dengan aborsi yang masih dalam proses, tidak kompli, tidak disadari, atau gagal pada waktu penilaian akhir, biasanya direkomendasikan untuk tindakan bedah, (sebagai contoh, [22]), sedangkan partisipan SMA lebih mungkin mendapatkan konseling untuk membiarkan prosesnya berjalan secara natural atau mendapatkan saran untuk menambah dosis misoprostol—sesuai dengan panduan WHO[1]—sebelum mengakses layanan kesehatan.[28]

Terakhir, baik dalam studi SAFE maupun studi non-klinis lainnya, partisipan dalam penelitian memiliki akses sewaktu-waktu ke konselor aborsi yang bertindak sebagai sumber informasi atas pertanyaan seputar perdarahan yang normal, dan efek samping, serta rujukan pada akses layanan kesehatan jika ada kemungkinan komplikasi. Komunikasi yang teratur dan suportif semacam ini dilakukan untuk membantu klien merasa lebih siap dalam menghadapi proses aborsi mereka,[29] dan mungkin berkontribusi pada peningkatan pemahaman dan kemampuan klien untuk membiarkan proses aborsi medis berjalan secara natural. Mengingat efektivitas rejimen misoprostol saja yang lebih tinggi dalam konteks SMA daripada klinis, penelitian tambahan diperlukan untuk mengeksplorasi bagaimana penyesuaian protokol dan peningkatan layanan konseling dan dukungan untuk klien aborsi pada konteks klinis dapat mengoptimalkan efektivitas rejimen misoprostol saja.

Ada beberapa tantangan yang muncul pada penelitian prospektif yang melibatkan partisipan SMA dalam konteks yang restriktif. Rancangan penelitian ini bergantung pada usia kehamilan, dan hasil aborsi yang dilaporkan secara mandiri oleh partisipan; dalam penelitian klinis, hasil ini biasanya dikonfirmasi dengan ultrasonografi. Tingkat akurasi pelaporan mandiri ini telah ditunjukkan di penelitian sebelumnya, yaitu membandingkan antara perhitungan usia kehamilan dengan hari pertama menstruasi terakhir dan ultrasonografi,[30] dan efektivitas serta keamanan aborsi medis tanpa pemeriksaan ultrasonografi.[31] Panduan teknis WHO mengatakan bahwa pemeriksaan ultrasonografi tidak diperlukan untuk aborsi medis pada usia kehamilan awal.[1] Lebih jauh lagi, beberapa penelitian dengan konteks yang beragam juga menunjukkan reliabilitas laporan mandiri untuk aborsi komplrit.[21] Mengingat pembatasan hukum pada aborsi di kedua negara, rekrutmen kelompok kontrol klinis menjadi tidak memungkinkan. Maka dari itu kami mengacu pada uji klinis historis yang menggunakan rejimen pengobatan yang sama pada rentang usia kehamilan yang sama pula[22-25]—sebuah pendekatan analitis dengan bukti kuat yang sudah ada.[26] Kami mengamati bahwa terdapat perbedaan minor di antara dua karakteristik *baseline* studi kohort SAFE dan kontrol historis. Namun berdasarkan penelitian yang sudah ada dan meta-analisis tentang efektivitas rejimen pada usia kehamilan yang berbeda-beda, kami tidak mengantisipasi baik perbedaan beberapa hari usia kehamilan di bawah 9 minggu maupun perbedaan usia partisipan antara 1-4 tahun. Kedua hal ini tidak kami perhitungkan sebagai faktor yang berpengaruh pada aborsi komplrit.[32] Dalam studi ini, terdapat pengurangan jumlah partisipan—4% partisipan tidak dapat dihubungi setelah survei awal. Dalam hal ini, kami

menggunakan asumsi sederhana di mana peserta yang tidak dapat dihubungi aborsinya gagal. Walaupun demikian, efek dari sumber yang bias ini dapat menjadi lebih rendah, dan dapat diukur pada studi-studi berikutnya. Pada akhirnya, penelitian ini tidak dirancang untuk membandingkan rejimen misoprostol saja dengan rejimen kombinasi; tetapi untuk melakukan penilaian pada efektivitas tiap rejimen untuk SMA bila dibandingkan dengan aborsi medis dengan intervensi klinis pada penelitian-penelitian sebelumnya. Oleh karena itu, kami menghimbau para pembaca untuk tidak membandingkan hasil laporan antara kelompok pengguna rejimen kombinasi dengan misoprostol saja pada studi SAFE. Batasan-batasan ini diimbangi oleh karakter sampel penelitian yang unik; hal inilah yang memungkinkan kami mengamati secara prospektif partisipan yang melakukan SMA pada dua konteks yang berbeda, sampel yang besar, kaya akan data dan sedikitnya partisipan yang hilang pada survei tindak lanjut.

Kesimpulan dari pembahasan ini adalah SMA dengan dukungan pendamping sangat efektif dan aman. Selanjutnya, pemerintah, lembaga profesional, dan tenaga medis sebaiknya menjadikan bukti-bukti yang sudah ada sebagai acuan dalam menyusun panduan kebijakan, dan praktik atas pendekatan SMA, serta memprioritaskan perluasan akses pada aborsi medis dengan berbagai macam model pelayanan—termasuk penggunaan secara mandiri.

#### **Pernyataan Kontribusi Penulis**

BG, CG, HM, IAK, IE, RJ, RM, RZ, dan SN berkontribusi pada konseptualisasi dan rancangan penelitian kuantitatif, CB, HM, RJ, RM, dan SC mengelola pengumpulan dan kualitas data, dan HM dan RJ melakukan analisis kuantitatif. HM memimpin penulisan manuskrip, dengan kontribusi, peninjauan, dan persetujuan dari semua penulis. Semua penulis telah membaca dan menyetujui manuskrip final. Semua penulis memiliki akses pada semua data dalam penelitian ini dan dua penulis (HM dan RJ) telah mengakses dan memverifikasi data. CG, HM dan RJ bertanggung jawab pada keputusan penyerahan manuskrip.

464 **Pernyataan Kepentingan**

465 Kami menyatakan bahwa tidak ada konflik kepentingan.

466 **Akses Data**

467 Protokol penelitian, rencana analisis dan instrumen tersedia untuk komunitas ilmiah secara daring  
468 (<https://bmjopen.bmj.com/content/10/11/e036800>). Semua permohonan akses pada data harus  
469 diberikan kepada Peneliti Utama via surel ([hmoseson@ibisreproductivehealth.org](mailto:hmoseson@ibisreproductivehealth.org)) untuk  
470 dipertimbangkan. Akses pada data anonim mungkin dapat diberikan setelah dilakukan peninjauan  
471 dan disetujui oleh catatan konsep peneliti oleh *Principal Investigator and Data Monitoring &*  
472 *Oversight Committee* dan setelah peneliti menandatangani persetujuan akses data.

473 **Ucapan Terima Kasih**

474 Penelitian ini didanai oleh hibah dari *David and Lucile Packard Foundation* kepada CG, HM dan  
475 RJ. HM didukung sebagian oleh dana hibah Institut Kesehatan Nasional (1R21CA256759-01).  
476 Kami berterima kasih pada partisipan dalam studi ini karena telah berbagi informasi tentang proses  
477 *self-managed abortion* mereka kepada tim peneliti. Kami juga mengucapkan terima kasih pada  
478 Ilana Dzuba, Sofia Filippa, Brianna Keefe-Oates, Onikepe Owolabi, Maria Yasinta, dan tim Le  
479 Revuelta atas kontribusinya yang besar dalam berbagai bentuk untuk studi ini.

480



12. Ganantra B, Gerdts C, Rossier C, Johnson Jr B, Tuncalp O, Assifi A, et al. Global, regional, and subregional classification of abortions by safety, 2010-14: estimates from a Bayesian hierarchical model. *Lancet*. 2017;390:2372-81. DOI: [http://dx.doi.org/10.1016/S0140-6736\(17\)31794-4](http://dx.doi.org/10.1016/S0140-6736(17)31794-4).
13. Braine N. Autonomous Health Movements: Criminalization, De-medicalization, and Community-Based Direct Action. *Health Hum Rights*. 2020;22(2):85-97. DOI.
14. Foster AM, Arnott G, Hobstetter M. Community-based distribution of misoprostol for early abortion: evaluation of a program along the Thailand Burma border. *Contraception*. 2017;96(4):242-7. DOI: 10.1016/j.contraception.2017.06.006.
15. Stillman M, Owolabi O, Akinyemi A, Moore A, Bankole A, Fatusi A, et al. Women's self-reported experiences using misoprostol obtained from drug sellers: a prospective cohort study in Lagos State, Nigeria. *BMJ Open*. 2020(IN PRESS). DOI.
16. Moseson H, Keefe-Oates B, Jayaweera RT, Filippa S, Motana R, Bercu C, et al. Studying Accompaniment model Feasibility and Effectiveness (SAFE) Study: study protocol for a prospective observational cohort study of the effectiveness of self-managed medication abortion. *BMJ Open*. 2020;10(11):e036800. DOI: 10.1136/bmjopen-2020-036800.
17. Ralph L, Foster DG, Raifman S, Biggs MA, Samari G, Upadhyay U, et al. Prevalence of Self-Managed Abortion Among Women of Reproductive Age in the United States. *JAMA Netw Open*. 2020;3(12):e2029245. DOI: 10.1001/jamanetworkopen.2020.29245.
18. Moseson H, Jayaweera R, Raifman S, Keefe-Oates B, Filippa S, Motana R, et al. Self-managed medication abortion outcomes: results from a prospective pilot study. *Reprod Health*. 2020;17(1):164. DOI: 10.1186/s12978-020-01016-4.
19. Okorie PC, Abayomi OA. Abortion laws in Nigeria: A Case for Reform. *Annual Survey of International and Comparative Law*. 2019;23(1):165-92. DOI.
20. Código Penal de la Nación Argentina, (1984).
21. Schmidt-Hansen M, Cameron S, Lohr PA, Hasler E. Follow-up strategies to confirm the success of medical abortion of pregnancies up to 10 weeks' gestation: A systematic review with meta-analyses. *Am J Obstet Gynecol*. 2019. DOI: 10.1016/j.ajog.2019.11.1244.
22. von Hertzen H, Piaggio G, Huong NTM, Arustamyan K, Cabezas E, Gomez M, et al. Efficacy of two intervals and two routes of administration of misoprostol for termination of early pregnancy: a randomised controlled equivalence trial. *The Lancet*. 2007;369(9577):1938-46. DOI: 10.1016/s0140-6736(07)60914-3.
23. von Hertzen H, Huong NT, Piaggio G, Bayalag M, Cabezas E, Fang AH, et al. Misoprostol dose and route after mifepristone for early medical abortion: a randomised controlled noninferiority trial. *BJOG*. 2010;117(10):1186-96. DOI: 10.1111/j.1471-0528.2010.02636.x.
24. Tang OS, Chan CC, Ng EH, Lee SW, Ho PC. A prospective, randomized, placebo-controlled trial on the use of mifepristone with sublingual or vaginal misoprostol for medical abortions of less than 9 weeks gestation. *Hum Reprod*. 2003;18(11):2315-8. DOI: 10.1093/humrep/deg475.

25. Tang OS, Xu J, Cheng L, Lee SW, Ho PC. Pilot study on the use of sublingual misoprostol with mifepristone in termination of first trimester pregnancy up to 9 weeks gestation. *Hum Reprod.* 2002;17(7):1738-40. DOI: 10.1093/humrep/17.7.1738.
26. Viele K, Berry S, Neuenschwander B, Amzal B, Chen F, Enas N, et al. Use of historical control data for assessing treatment effects in clinical trials. *Pharm Stat.* 2014;13(1):41-54. DOI: 10.1002/pst.1589.
27. Aiken A, Lohr PA, Lord J, Ghosh N, Starling J. Effectiveness, safety and acceptability of no-test medical abortion provided via telemedicine: a national cohort study. *BJOG.* 2021. DOI: 10.1111/1471-0528.16668.
28. Jayaweera RT, Moseson H, Gerds C. Misoprostol in the era of COVID-19: a love letter to the original medical abortion pill. *Sex Reprod Health Matters.* 2020;28(1):1829406. DOI: 10.1080/26410397.2020.1829406.
29. Gerds C, Jayaweera RT, Kristianingrum IA, Khan Z, Hudaya I. Effect of a smartphone intervention on self-managed medication abortion experiences among safe-abortion hotline clients in Indonesia: A randomized controlled trial. *Int J Gynaecol Obstet.* 2020;149(1):48-55. DOI: 10.1002/ijgo.13086.
30. Bracken H, Clark W, Lichtenberg ES, Schweikert SM, Tanenhaus J, Barajas A, et al. Alternatives to routine ultrasound for eligibility assessment prior to early termination of pregnancy with mifepristone-misoprostol. *BJOG.* 2011;118(1):17-23. DOI: 10.1111/j.1471-0528.2010.02753.x.
31. Raymond E, Chong E, Winikoff B, Platais I, Mary M, Lotarevich T, et al. TelAbortion: evaluation of a direct to patient telemedicine abortion service in the United States. *Contraception.* 2019;100(3):173-7. DOI: 10.1016/j.contraception.2019.05.013.
32. Ashok PW, Templeton A, Wagaarachchi PT, Flett GM. Factors affecting the outcome of early medical abortion: a review of 4132 consecutive cases. *BJOG.* 2002;109(11):1281-9. DOI: 10.1046/j.1471-0528.2002.02156.x.

588 **Tabel 1. Rekomendasi Protokol Obat oleh Konselor Kelompok Pendamping berdasarkan**  
 589 **Durasi Kehamilan**

| <b>Durasi Kehamilan</b> | <b>Mifepristone dan Misoprostol</b>                                                                                                                                                                                                                                                                                                                                                                                                                | <b>Misoprostol saja</b>                                                                                                                                                                                                                                                                                                                                                                                                                                                                                                                              |
|-------------------------|----------------------------------------------------------------------------------------------------------------------------------------------------------------------------------------------------------------------------------------------------------------------------------------------------------------------------------------------------------------------------------------------------------------------------------------------------|------------------------------------------------------------------------------------------------------------------------------------------------------------------------------------------------------------------------------------------------------------------------------------------------------------------------------------------------------------------------------------------------------------------------------------------------------------------------------------------------------------------------------------------------------|
| Sampai 90 hari          | Telan 1 tablet mifepristone (200mg) secara oral, setelah 24-48 jam, letakkan 4 pil misoprostol (800mcg) di bawah lidah (sublingual), biarkan larut selama 30 menit, dan tetap telan sampai semua pil larut, atau masukkan ke dalam vagina (vaginal); jika setelah 3 jam tidak ada tanda-tanda reaksi atau efek samping atau keluarnya hasil konsepsi, tambahkan 2 pil misoprostol (400mcg) di bawah lidah atau di dalam vagina, dan biarkan larut. | Letakkan 4 pil (800mg) di bawah lidah (sublingual), biarkan larut selama 30 menit, tetap telan air liur sampai semua pil larut; setelah 3 jam, tambahkan dosis kedua dengan 4 pil (800mcg) di bawah lidah dan biakan larut selama 30 menit, tetap telan air liur sampai semua pil larut; setelah 3 jam, tambahkan dosis ketiga dengan 4 pil (800mcg) di bawah lidah dan biakan larut selama 30 menit, tetap telan air liur sampai semua pil larut; lanjutkan dengan 2 sampai 4 misoprostol di bawah lidah setiap 3 jam sampai hasil konsepsi keluar. |
| Lebih dari 90 hari*     | Telan 1 tablet mifepristone (200mg) secara oral, setelah 36-48 jam, letakkan 2 pil misoprostol (400mcg) di bawah lidah (sublingual), biarkan larut selama 30 menit, dan tetap telan air liur sampai semua pil larut; setelah 3 jam tambahkan 2 pil misoprostol (400mcg) di bawah lidah dan biarkan larut; lanjutkan dengan 2 misoprostol di bawah lidah setiap 3 jam sampai hasil konsepsi keluar                                                  | Letakkan 2 pil (400mg) di bawah lidah (sublingual), biarkan larut selama 30 menit, tetap telan air liur sampai semua pil larut; setelah 3 jam, tambahkan dosis kedua dengan 2 pil (400mcg) di bawah lidah dan biakan larut selama 30 menit, tetap telan air liur sampai semua pil larut; setelah 3 jam, tambahkan dosis ketiga dengan 2 pil (400mcg) di bawah lidah dan biakan larut selama 30 menit, tetap telan air liur sampai semua pil larut; lanjutkan dengan 2 misoprostol di bawah lidah setiap 3 jam sampai hasil konsepsi keluar.          |

590 \* Detil tambahan untuk prosedur self-managed abortion dengan pendampingan untuk usia  
 591 kehamilan di atas 12 minggu dapat ditemukan di sumber yang lain.

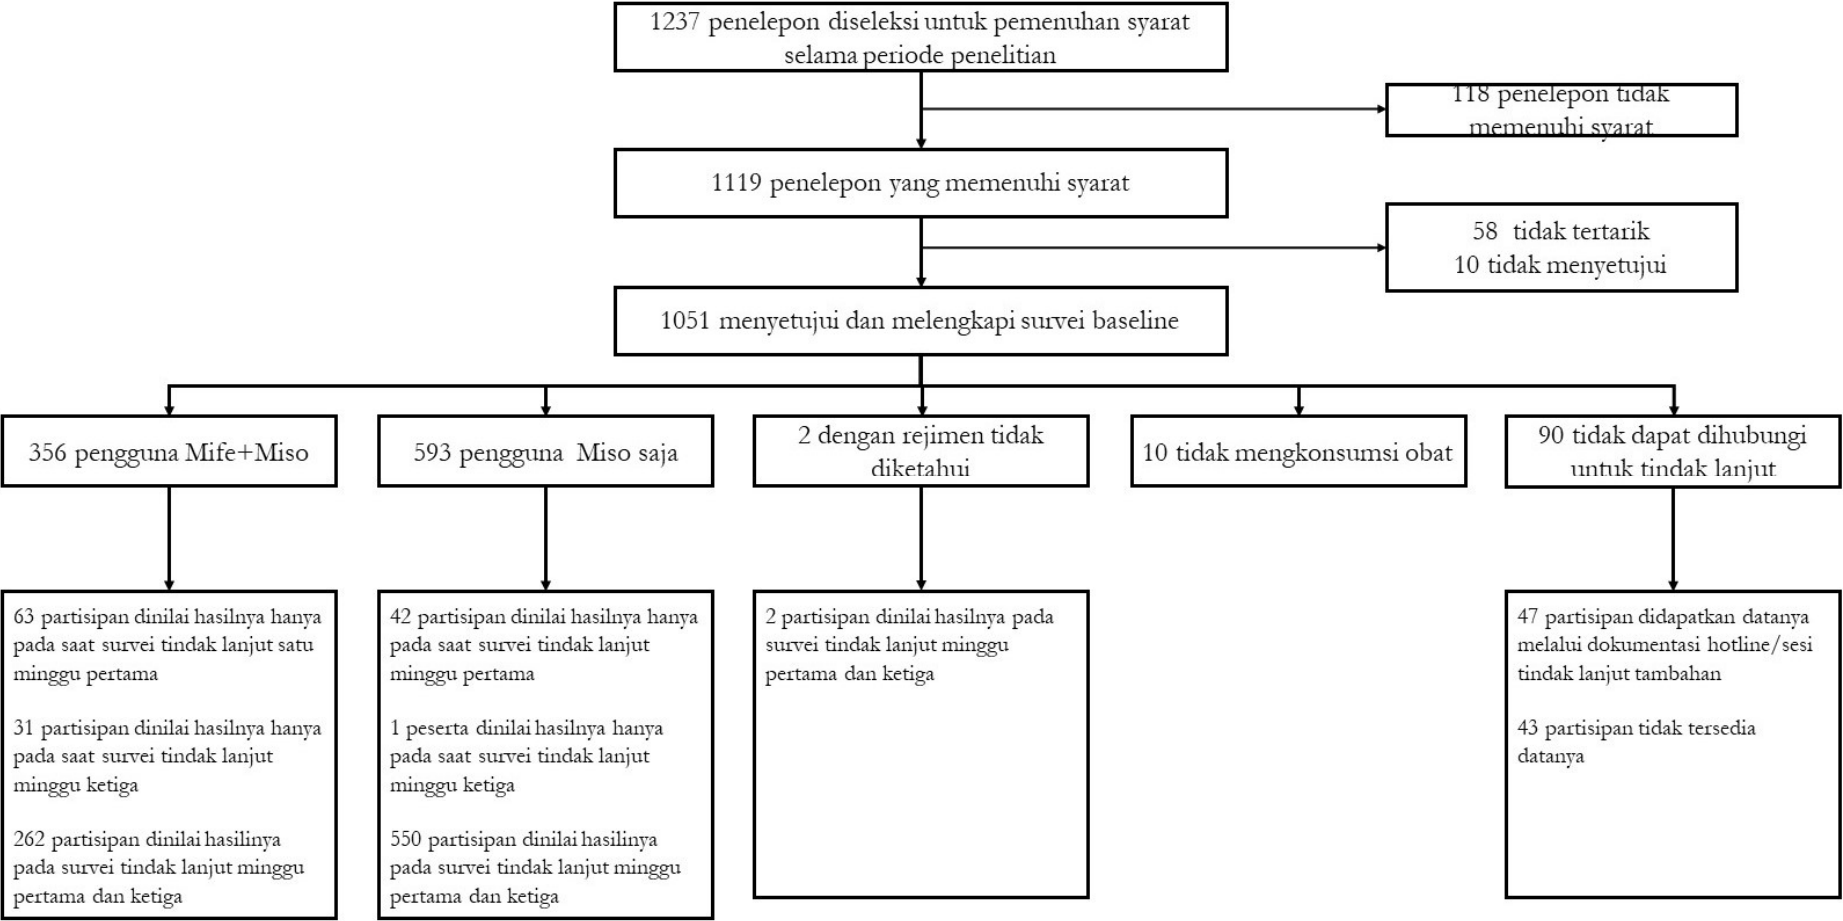

595 **Tabel 2. Sosio Demografis Partisipan dan Karakteristik Kehamilan**

|                                                | Semua Rejimen |       | Mife+Miso |       | Misoprostol saja |       | Tidak diketahui |        |
|------------------------------------------------|---------------|-------|-----------|-------|------------------|-------|-----------------|--------|
|                                                | n             | %     | n         | %     | n                | %     | n               | %      |
| <i>Jumlah awal N</i>                           | 1051          | 100   | 356       | 100   | 593              | 100   | 102             | 100    |
| <b>Usia Partisipan (tahun)</b>                 |               |       |           |       |                  |       |                 |        |
| Rata-rata usia partisipan                      | 28.1          | (6.0) | 27.5      | (6.3) | 28.5             | (5.8) | 33.0            | (12.7) |
| 14 tahun                                       | 2             | 0.2   | 2         | 0.6   | 0                | 0     | 0               | 0.0    |
| 15-19 tahun                                    | 50            | 4.8   | 27        | 7.6   | 17               | 2.9   | 6               | 5.9    |
| 20-24 tahun                                    | 271           | 25.8  | 101       | 28.4  | 136              | 22.9  | 34              | 33.3   |
| 25-29 tahun                                    | 340           | 32.4  | 103       | 28.9  | 214              | 36.1  | 23              | 22.5   |
| 30-34 tahun                                    | 211           | 20.1  | 73        | 20.5  | 116              | 19.6  | 22              | 21.6   |
| 35-39 tahun                                    | 137           | 13    | 35        | 9.8   | 89               | 15    | 13              | 12.7   |
| 40-44 tahun                                    | 36            | 3.4   | 15        | 4.2   | 18               | 3     | 3               | 2.9    |
| 45-49 tahun                                    | 3             | 0.3   | 0         | 0     | 2                | 0.3   | 1               | 1.0    |
| 50 tahun                                       | 1             | 0.1   | 0         | 0     | 1                | 0.2   | 0               | 0.0    |
| <b>Tingkat Pendidikan</b>                      |               |       |           |       |                  |       |                 |        |
| Tidak sekolah                                  | 2             | 0.2   | 2         | 0.6   | 0                | 0     | 0               |        |
| Lulus sekolah dasar                            | 134           | 12.7  | 97        | 27.2  | 14               | 2.4   | 23              | 22.5   |
| Lulus sekolah menengah                         | 397           | 37.8  | 117       | 32.9  | 248              | 41.8  | 32              | 31.4   |
| Lebih dari sekolah menengah                    | 518           | 49.3  | 140       | 39.3  | 331              | 55.8  | 47              | 46.1   |
| <b>Ascertainment of pregnancy (select all)</b> |               |       |           |       |                  |       |                 |        |
| Melakukan tes kehamilan di rumah               | 700           | 66.6  | 292       | 82    | 334              | 56.3  | 74              | 72.5   |
| Melakukan tes darah di fasilitas kesehatan     | 285           | 27.1  | 55        | 15.4  | 205              | 34.6  | 25              | 24.5   |
| Melakukan tes urin di fasilitas kesehatan      | 114           | 10.8  | 2         | 0.6   | 105              | 17.7  | 7               | 6.9    |
| USG                                            | 113           | 10.8  | 89        | 25    | 7                | 1.2   | 17              | 16.7   |
| Terlambat Menstruasi                           | 37            | 3.5   | 31        | 8.7   | 1                | 0.2   | 5               | 4.9    |
| Gejala kehamilan                               | 13            | 1.2   | 11        | 3.1   | 0                | 0     | 2               | 2.0    |
| Lainnya                                        | 1             | 0.1   | 0         | 0     | 0                | 0     | 1               | 1.0    |
| <b>Durasi Kehamilan</b>                        |               |       |           |       |                  |       |                 |        |
| Rata-rata durasi kehamilan                     | 7.0           | (2.2) | 7.6       | (2.6) | 6.7              | (1.8) | 7.0             | (1.4)  |
| < 7 minggu                                     | 518           | 49.3  | 141       | 39.6  | 330              | 55.6  | 47              | 46.1   |
| [7-9] minggu                                   | 340           | 32.4  | 134       | 37.6  | 174              | 29.3  | 32              | 31.4   |
| [9-12] minggu                                  | 141           | 13.4  | 50        | 14    | 75               | 12.6  | 16              | 15.7   |
| [12-22] minggu                                 | 52            | 4.9   | 31        | 8.7   | 14               | 2.4   | 7               | 6.9    |

597    **Tabel 3. Aborsi Komplit**

598

| Aborsi Komplit                      | Semua Rejimen <sup>1</sup> |    | Mifepristone + Misoprostol |    |            |    |              |    |               |    |                |    | Misoprostol saja     |    |            |    |              |    |               |    |                |     |
|-------------------------------------|----------------------------|----|----------------------------|----|------------|----|--------------|----|---------------|----|----------------|----|----------------------|----|------------|----|--------------|----|---------------|----|----------------|-----|
|                                     | Semua Usia Kehamilan       |    | Semua Usia Kehamilan       |    | < 7 minggu |    | [7-9] minggu |    | [9-12] minggu |    | [12-22] minggu |    | Semua Usia Kehamilan |    | < 7 minggu |    | [7-9] minggu |    | [9-12] minggu |    | [12-22] minggu |     |
|                                     | n                          | %  | n                          | %  | n          | %  | n            | %  | n             | %  | n              | %  | n                    | %  | n          | %  | n            | %  | n             | %  | n              | %   |
| Satu minggu setelah konsumsi pil    | n = 919 <sup>2</sup>       | %  | n = 325                    | %  | n = 132    | %  | n = 122      | %  | n = 45        | %  | n = 26         | %  | n = 592              | %  | n = 329    | %  | n = 174      | %  | n = 75        | %  | n = 14         | %   |
| Komplit tanpa intervensi bedah      | 868                        | 94 | 300                        | 92 | 126        | 96 | 112          | 92 | 41            | 91 | 21             | 81 | 566                  | 96 | 317        | 96 | 165          | 95 | 70            | 93 | 14             | 100 |
| Komplit dengan intervensi bedah     | 10                         | 1  | 9                          | 3  | 1          | 1  | 2            | 2  | 2             | 4  | 4              | 15 | 1                    | <1 | 1          | <1 | 0            | 0  | 0             | 0  | 0              | 0   |
| Tidak komplit/tidak yakin           | 40                         | 4  | 16                         | 5  | 5          | 4  | 8            | 7  | 2             | 4  | 1              | 4  | 24                   | 4  | 11         | 3  | 9            | 5  | 4             | 5  | 0              | 0   |
| Tidak dapat dihubungi               | 1                          | <1 | 0                          | 0  | 0          | 0  | 0            | 0  | 0             | 0  | 0              | 0  | 1                    | <1 | 0          | 0  | 0            | 0  | 1             | 1  | 0              | 0   |
| Saat survei tindak lanjut terakhir: | n = 951                    | %  | n = 356                    | %  | n = 141    | %  | n = 134      | %  | n = 50        | %  | n = 31         | %  | n = 593              | %  | n = 330    | %  | n = 174      | %  | n = 75        | %  | n = 14         | %   |
| Komplit tanpa intervensi bedah      | 922                        | 97 | 334                        | 94 | 134        | 95 | 131          | 98 | 46            | 92 | 23             | 74 | 586                  | 99 | 327        | 99 | 172          | 99 | 74            | 99 | 13             | 93  |
| Komplit dengan intervensi bedah     | 17                         | 2  | 14                         | 4  | 2          | 1  | 2            | 2  | 3             | 6  | 7              | 23 | 3                    | 1  | 2          | 1  | 0            | 0  | 0             | 0  | 1              | 7   |
| Tidak komplit/tidak yakin           | 10                         | 1  | 8                          | 2  | 5          | 4  | 1            | 1  | 1             | 2  | 1              | 3  | 2                    | <1 | 1          | <1 | 1            | 1  | 0             | 0  | 0              | 0   |
| Tidak dapat dihubungi               | 2                          | <1 | 0                          | 0  | 0          | 0  | 0            | 0  | 0             | 0  | 0              | 0  | 2                    | <1 | 0          | 0  | 1            | 1  | 1             | 1  | 0              | 0   |

599    <sup>1</sup> Termasuk 2 partisipan dengan rejimen aborsi yang tidak diketahui

600    <sup>2</sup> 32 partisipan yang tidak mengikuti survei tindak lanjut pertama tidak dimasukkan ke denominator

601

602

603 **Gambar 2. Asesmen non-inferioritas efektivitas aborsi medis mandiri, seperti diukur pada studi SAFE di antara 779 partisipan**  
604 **dengan usia kehamilan <9 minggu, dibandingkan dengan efektivitas aborsi medis dengan intervensi klinis, seperti diukur pada**  
605 **uji klinis historis di antara 1,463 partisipan dengan usia kehamilan <9 minggu**

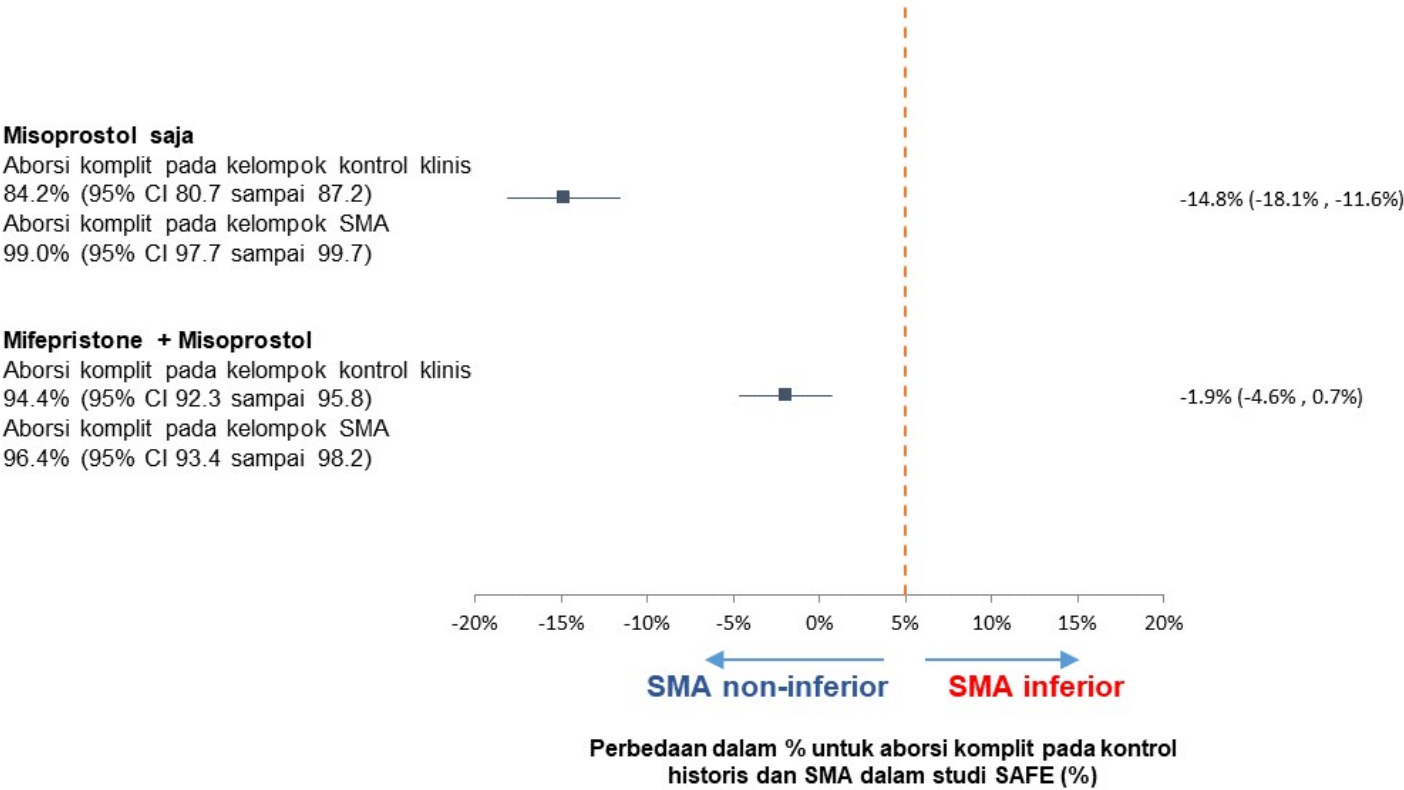

Figure 2
